# Supplementary material for: Emergence and diversification of a highly invasive chestnut pathogen lineage across southeastern Europe
Source: eLife. 2021 Mar 5;10:e56279. doi: 10.7554/eLife.56279 (PMC7935491; doi:10.7554/eLife.56279)
Supplement: Supplementary file 1. [file elife-56279-supp1.xlsx]

## Sheet: Supplementary Table 1
Supplementary File 1: Information on all analyzed isolates including sampling location, vegetative compatibility type (EU-type), SSR genotyping outcome, collector information, collection years and NCBI accessions
						SSR Genotyping
Sample	Country	Region	Europ.PopNr	S12pop	vctype	MAT	CPE3	CPE4	CPG6	CPE8	CPG3	I07.650R	CPE1	CPE5	CPG14	CPG4	Collector/Publication	Notes	Collection Year	NCBI Bioproject
B55	Slovenia	Brezice	43	non-S12	EU-29	MAT-2	192	230	245	111	216	274	148	252	256	207	Krstin et al. 2011		2005	PRJNA604575
BC47B	Albania	Bajram Curri	1	S12	EU-12	MAT-1	192	218	243	111	197	295	130	255	256	207	Kiril Sotirovski		2015	PRJNA604575
BC5A	Albania	Bajram Curri	1	S12	EU-12	MAT-1	192	218	243	111	197	295	130	255	256	207	Kiril Sotirovski		2015	PRJNA604575
BE22	Bulgaria	Berkovitsa	8	S12	EU-12	MAT-1	192	218	243	102	197	294	130	255	256	207	Milgroom et al. 2008		2005	PRJNA604575
BE37	Bulgaria	Berkovitsa	8	S12	EU-12	MAT-1	192	218	243	102	197	294	130	255	256	207	Milgroom et al. 2008		2005	PRJNA604575
BR106	Bulgaria	Barziya	7	S12	EU-12	MAT-1	192	218	243	102	197	294	130	255	256	207	Milgroom et al. 2008		2005	PRJNA604575
BR114	Bulgaria	Barziya	7	S12	EU-12	MAT-1	192	218	243	102	197	294	130	255	256	207	Milgroom et al. 2008		2005	PRJNA604575
BR117	Bulgaria	Barziya	7	S12	EU-12	MAT-1	192	218	243	102	197	294	130	255	256	207	Milgroom et al. 2008		2005	PRJNA604575
CR03	Croatia	Cres	10	S12	EU-12	MAT-1	192	218	243	111	197	295	130	255	256	207	Krstin et al. 2008		2004	PRJNA604575
CR40	Croatia	Cres	10	non-S12	EU-13	MAT1+2	192	230	245	111	216	295	148	260	256	207	Krstin et al. 2008		2004	PRJNA604575
CT10	Italy	Zafferano	27	S12	EU-12	MAT-1	192	218	243	111	197	295	130	255	256	207	Milgroom et al. 2008		2003	PRJNA604575
CT17	Italy	Zafferano	27	S12	EU-12	MAT-1	192	218	243	102	197	294	130	255	256	207	Milgroom et al. 2008		2003	PRJNA604575
CT41	Italy	Zafferano	27	S12	EU-12	MAT-1	192	218	243	102	197	294	130	255	256	207	Milgroom et al. 2008		1995	PRJNA604575
CT48	Italy	Zafferano	27	S12	EU-12	MAT-1	192	218	243	102	197	294	130	255	256	207	Milgroom et al. 2008		1995	PRJNA604575
CT5	Italy	Zafferano	27	S12	EU-12	MAT-1	192	218	243	102	197	294	130	255	256	207	Milgroom et al. 2008		2003	PRJNA604575
CT59	Italy	Zafferano	27	S12	EU-12	MAT-1	192	218	243	111	197	295	130	255	256	207	Milgroom et al. 2008		1995	PRJNA604575
De11	Kosovo	Decan	28	S12	EU-12	MAT-1	192	218	243	102	197	294	130	255	256	207	Kiril Sotirovski		2005	PRJNA604575
De16	Kosovo	Decan	28	S12	EU-12	MAT-1	192	218	243	102	197	294	130	255	256	207	Kiril Sotirovski		2015	PRJNA604575
DU5	USA	Depot Hill (NY)	NA	non-S12	EU-03	MAT1+2	192	218	243	111	216	280	148	255	261	207	Milgroom and Lipari 1995		1990	PRJNA604575
GC3	Greece	Kastaneri	20	S12	EU-12	MAT-1	192	218	243	102	197	294	130	255	256	207	Milgroom et al. 2008		2000	PRJNA604575
Tkhi24	Georgia	Gezruli	15	S12	EU-12	MAT-1	192	218	243	111	197	295	130	255	256	207	Prospero et al. 2013	Isolate GEZ45 in all analysis and NCBI SRA (Accession SRR11005070)	2011	PRJNA604575
GG1B	Greece	Griva	18	S12	EU-12	MAT-1	192	218	243	102	197	294	130	255	256	207	Milgroom et al. 2008		2000	PRJNA604575
GG4	Greece	Griva	18	S12	EU-12	MAT-1	192	218	243	102	197	294	130	255	256	207	Milgroom et al. 2008		2000	PRJNA604575
GG5B	Greece	Griva	18	S12	EU-12	MAT-1	192	218	243	102	197	294	130	255	256	207	Milgroom et al. 2008		2000	PRJNA604575
GS2	Greece	Stageria	21	S12	EU-12	MAT-1	192	218	243	111	197	295	130	255	256	207	Milgroom et al. 2008		2000	PRJNA604575
GS6	Greece	Stageria	21	S12	EU-12	MAT-1	192	218	243	102	197	294	130	255	256	207	Milgroom et al. 2008		2000	PRJNA604575
HK60B	Croatia	Hrvatska Kostajnica	11	non-S12	EU-12	MAT-1	192	230	243	111	197	280	130	255	256	207	Jezic 2018		2014	PRJNA604575
IB10	Turkey	Izmir Bigakgi	60	S12	EU-12	MAT-1	192	218	243	102	197	294	130	255	256	207	Secil Akilli		NA	PRJNA604575
IB11	Turkey	Izmir Bigakgi	60	S12	EU-12	MAT-1	192	218	243	102	197	294	130	255	256	207	Secil Akilli		NA	PRJNA604575
IB14	Turkey	Izmir Bigakgi	60	S12	EU-12	MAT-1	192	218	243	102	197	294	130	255	256	207	Secil Akilli		NA	PRJNA604575
IB20	Turkey	Izmir Bigakgi	60	S12	EU-12	MAT-1	192	218	243	102	197	294	130	255	256	207	Secil Akilli		NA	PRJNA604575
IB24	Turkey	Izmir Bigakgi	60	S12	EU-12	MAT-1	192	218	243	102	197	294	130	255	256	207	Secil Akilli		NA	PRJNA604575
IK5	Turkey	Izmir Kugukoren	60	S12	EU-12	MAT-1	192	218	243	102	197	294	130	255	256	207	Secil Akilli		NA	PRJNA604575
IS31	Croatia	Istria-Buje	12	non-S12	EU-17	MAT-2	NA	NA	NA	NA	NA	NA	NA	NA	NA	NA	Krstin et al. 2008		2004	PRJNA604575
KA11	Turkey	Kure	61	S12	EU-12	MAT-1	192	218	243	111	197	295	130	255	256	207	Secil Akilli		NA	PRJNA604575
KY7	USA	Kentucky, Natural Bridge State Park	NA	non-S12	EU-13 or EU-70 or EU-74	MAT-2	192	230	245	111	216	295	148	260	256	190	Milgroom and Lipari 1995		1993	PRJNA604575
M1341	Italy	Tonara	26	S12	EU-12	MAT-1	192	218	243	102	197	294	130	255	256	207	Paolo Cortesi (vc tester)		1993	PRJNA604575
M1395	Switzerland	Gnosca	53	non-S12	EU-17	MAT-1	192	230	243	111	197	280	130	255	256	207	Daniel Rigling		1990	PRJNA604575
M1397	Switzerland	Gnosca	53	non-S12	EU-04	MAT-1	192	230	243	111	216	280	148	255	256	207	Daniel Rigling (vc tester)		1990	PRJNA604575
M1400	Switzerland	Gnosca	53	non-S12	EU-31	MAT-2	192	230	265	111	216	280	130	252	256	207	Daniel Rigling (vc tester)		1992	PRJNA604575
M1405	Bosnia	Projsa	3	non-S12	EU-13 or EU-70 or EU-74	MAT-1	192	230	245	111	216	295	148	260	256	207	Mirsad Taric		1997	PRJNA604575
M1407	Bosnia	Projsa	3	non-S12	EU-12	MAT-2	192	230	243	102	197	279	130	255	256	207	Mirsad Taric		1997	PRJNA604575
M1412	Bosnia	Projsa	3	non-S12	EU-11	MAT-1	192	218	243	111	197	295	148	255	256	207	Mirsad Taric		1997	PRJNA604575
M1415	Bosnia	Projsa	3	non-S12	EU-02	MAT-2	192	230	111	216	243	280	130	252	268	207	Mirsad Taric		1997	PRJNA604575
M1416	Bosnia	Projsa	3	S12	EU-12	MAT-1	192	218	243	111	197	295	130	255	256	207	Mirsad Taric		1997	PRJNA604575
M1426	Bosnia	Projsa	3	S12	EU-12	MAT-1	192	218	243	111	197	295	130	255	256	207	Mirsad Taric		1997	PRJNA604575
M1427	Bosnia	Projsa	3	S12	EU-12	MAT-1	192	218	243	111	197	295	130	255	256	207	Mirsad Taric		1998	PRJNA604575
M1430	Bosnia	Projsa	3	non-S12	EU-12	MAT-2	192	218	243	102	197	294	130	255	256	207	Mirsad Taric		1997	PRJNA604575
M1431	Bosnia	Projsa	3	non-S12	EU-12	MAT-2	192	218	243	111	197	295	130	255	256	207	Mirsad Taric		1997	PRJNA604575
M1741	Bosnia	Konjic	2	S12	EU-12	MAT-1	192	218	243	102	197	294	130	255	256	207	Mirsad Taric		1998	PRJNA604575
M1746	Bosnia	Konjic	2	S12	EU-12	MAT-1	192	218	243	111	197	295	130	255	256	207	Mirsad Taric		1998	PRJNA604575
M1755	Bosnia	Konjic	2	S12	EU-12	MAT-1	192	218	243	102	197	294	130	255	256	207	Mirsad Taric		1998	PRJNA604575
M1779	Bosnia	Konjic	2	non-S12	EU-12	MAT-2	192	218	243	111	197	295	130	255	256	207	Mirsad Taric		1998	PRJNA604575
M1781	Bosnia	Konjic	2	S12	EU-12	MAT-1	192	218	243	111	197	295	130	255	261	207	Mirsad Taric		1998	PRJNA604575
M1782	Bosnia	Konjic	2	S12	EU-12	MAT-1	192	218	243	111	197	295	130	255	256	207	Mirsad Taric		1998	PRJNA604575
M1786	Bosnia	Konjic	2	S12	EU-12	MAT-1	192	218	243	111	197	295	130	255	256	207	Mirsad Taric		1998	PRJNA604575
M1793	Bosnia	Vrnograc	4	non-S12	EU-05	MAT-1	NA	NA	NA	NA	NA	NA	NA	NA	NA	NA	Mirsad Taric		1998	PRJNA604575
M1797	Bosnia	Vrnograc	4	non-S12	EU-18	MAT-2	192	218	245	111	216	295	130	255	268	207	Mirsad Taric		1998	PRJNA604575
M1799	Bosnia	Vrnograc	4	non-S12	EU-12	MAT-2	192	230	265	111	197	295	148	252	268	207	Mirsad Taric		1998	PRJNA604575
M18	Croatia	Markusevac	13	S12	EU-12	MAT-1	192	218	243	111	197	295	130	255	256	207	Krstin et al. 2008		1998	PRJNA604575
M1800	Bosnia	Vrnograc	4	non-S12	EU-17	MAT-2	192	230	245	111	197	295	130	255	256	207	Mirsad Taric		1998	PRJNA604575
M1805	Bosnia	Vrnograc	4	non-S12	EU-03	MAT-1	192	218	265	111	197	274	148	252	256	207	Mirsad Taric		1998	PRJNA604575
M1808	Bosnia	Vrnograc	4	non-S12	EU-12	MAT-1	192	230	243	102	197	294	130	255	256	207	Mirsad Taric		1998	PRJNA604575
M1818	Bosnia	Vrnograc	4	non-S12	EU-19	MAT-1	192	230	245	111	216	295	130	255	268	190	Mirsad Taric		1998	PRJNA604575
M1825	Bosnia	Vrnograc	4	non-S12	EU-17	MAT-1	192	230	243	111	216	280	130	252	268	207	Mirsad Taric		1998	PRJNA604575
M1827	Bosnia	Vrnograc	4	non-S12	EU-12	MAT-2	192	218	243	102	197	294	130	255	256	207	Mirsad Taric		1998	PRJNA604575
M1828	Bosnia	Vrnograc	4	non-S12	EU-01	MAT-2	192	230	111	216	265	274	148	252	256	207	Mirsad Taric		1998	PRJNA604575
M1834	Bosnia	Vrnograc	4	non-S12	EU-15	MAT-2	192	218	243	111	216	295	148	255	256	207	Mirsad Taric		1998	PRJNA604575
M1835	Bosnia	Vrnograc	4	S12	EU-12	MAT-1	192	218	243	111	197	295	130	255	256	207	Mirsad Taric		1998	PRJNA604575
M1838	Bosnia	Buzim	5	non-S12	EU-09 or EU-66	MAT-1	194	230	243	111	197	295	130	255	256	190	Mirsad Taric		1998	PRJNA604575
M1860	Bosnia	Buzim	5	S12	EU-12	MAT-1	192	218	243	111	197	295	130	255	256	207	Mirsad Taric		1998	PRJNA604575
M1864	Bosnia	Buzim	5	non-S12	EU-09	MAT-1	194	218	243	111	211	295	130	255	256	190	Mirsad Taric		1998	PRJNA604575
M1874	Bosnia	Buzim	5	non-S12	EU-28	MAT-2	192	218	245	111	197	280	130	255	268	211	Mirsad Taric		1998	PRJNA604575
M2261	Greece	unknown	NA	non-S12	EU-01	MAT-2	192	230	111	216	265	274	148	252	256	207	Chariklia Perlerou		1996	PRJNA604575
M2262	Greece	unknown	NA	non-S12	EU-01	MAT-2	192	230	111	216	265	274	148	252	256	207	Chariklia Perlerou		1996	PRJNA604575
M2266	Greece	Ioannina	19	non-S12	EU-02	MAT-1	192	230	111	216	243	280	130	252	268	207	Chariklia Perlerou		1996	PRJNA604575
M2466	Switzerland	Claro	50	non-S12	EU-12	MAT-2	192	230	243	111	197	280	130	255	256	207	Diss. P. Hoegger 1999		1996	PRJNA604575
M270	Switzerland	Bellinzona	47	non-S12	EU-02	MAT-1	192	230	243	111	216	280	130	252	268	207	H.Kern		1951	PRJNA604575
M272	Switzerland	Corcapolo	51	non-S12	EU-05	MAT-2	192	230	265	111	216	274	148	252	256	207	G.Bazzigher		1951	PRJNA604575
M274	Switzerland	Neggio	54	non-S12	EU-22	MAT-2	192	230	243	111	197	280	130	252	256	207	G.Bazzigher		1954	PRJNA604575
M278	USA	Katonah (NY)	NA	non-S12	EU-58	MAT-1	192	218	245	111	197	280	148	260	256	207	H.Kern		1954	PRJNA604575
M296	USA	Beltsville	NA	non-S12	EU-45	MAT-2	192	218	243	111	216	295	130	260	256	190	Dr. Berry		1957	PRJNA604575
M4009	Switzerland	Biasca	48	non-S12	EU-22	MAT-2	192	230	243	111	216	280	130	252	268	207	Daniel Rigling		2004	PRJNA604575
M4020	Switzerland	Biasca	48	non-S12	EU-13	MAT-1	192	230	245	111	216	295	148	260	256	207	Daniel Rigling		2004	PRJNA604575
M4022	Switzerland	Biasca	48	non-S12	EU-12	MAT-2	192	230	243	111	197	280	130	255	256	207	Daniel Rigling		2004	PRJNA604575
M4023	Switzerland	Biasca	48	non-S12	EU-12	MAT-2	192	230	243	111	197	280	130	255	256	207	Daniel Rigling		2004	PRJNA604575
M4030	Switzerland	Biasca	48	non-S12	EU-01	MAT1+2	192	230	111	216	265	274	148	252	256	207	Daniel Rigling		2004	PRJNA604575
M4092	Switzerland	Walchwil	57	non-S12	EU-13	MAT-2	192	230	265	111	216	295	148	260	256	207	Ursula Heiniger		2000	PRJNA604575
M4948	Macedonia	Vodno	37	S12	EU-12	MAT-1	192	218	243	102	197	294	130	255	256	207	Kiril Sotirovski		2007	PRJNA604575
M4957	Macedonia	Vodno	37	S12	EU-12	MAT-1	192	218	243	102	197	294	130	255	256	207	Kiril Sotirovski		2007	PRJNA604575
M4962	Macedonia	Vodno	37	S12	EU-12	MAT-1	192	218	243	102	197	294	130	255	256	207	Kiril Sotirovski		2007	PRJNA604575
M5002	Bulgaria	Petrovo	9	S12	EU-12	MAT-1	192	218	243	102	197	294	130	255	256	207	Kiril Sotirovski		2007	PRJNA604575
M5003	Bulgaria	Petrovo	9	S12	EU-12	MAT-1	192	218	243	102	197	294	130	255	256	207	Kiril Sotirovski		2007	PRJNA604575
M5004	Bulgaria	Petrovo	9	S12	EU-12	MAT-1	192	218	243	102	197	294	130	255	256	207	Kiril Sotirovski		2007	PRJNA604575
M5011	Bulgaria	Petrovo	9	S12	EU-12	MAT-1	192	218	243	102	197	294	130	255	256	207	Kiril Sotirovski		2007	PRJNA604575
M5014	Bulgaria	Petrovo	9	S12	EU-12	MAT-1	192	218	243	102	197	294	130	255	256	207	Kiril Sotirovski		2007	PRJNA604575
M5036	Bulgaria	Berkovitza	8	S12	EU-12	MAT-1	192	218	243	NA	197	294	130	255	256	207	Kiril Sotirovski		2007	PRJNA604575
M5041	Bulgaria	Berkovitza	8	S12	EU-12	MAT-1	192	218	243	102	197	294	130	255	256	207	Kiril Sotirovski		2007	PRJNA604575
M5050	Bulgaria	Berkovitza	8	S12	EU-12	MAT-1	192	218	243	102	197	294	130	255	256	207	Kiril Sotirovski		2007	PRJNA604575
M5100	Switzerland	Gilly	52		EU-65	MAT-2	192	246	245	99	214	295	144	260	256	190	Simone Prospero		2007	PRJNA604575
M5266	Switzerland	Brissago	49	non-S12	EU-30	MAT-1	192	230	243	111	216	274	130	252	268	207	Simone Prospero		2008	PRJNA604575
M5398	Bosnia	Kostajnica	6	non-S12	EU-07	MAT-2	192	230	265	111	216	295	130	252	256	207	Bryner and Rigling, Phytopathology 102, 2012		2005	PRJNA604575
M5444	Bosnia	Kostajnica	6	non-S12	EU-38	MAT-2	192	218	243	111	197	280	130	252	268	207	Bryner and Rigling, Phytopathology 102, 2012		2008	PRJNA604575
M5759	Switzerland	Gnosca	53	non-S12	EU-12	MAT-1	192	230	243	102	197	279	123	255	268	207	Bryner and Rigling, Phytopathology 102, 2012		2010	PRJNA604575
M6697	Switzerland	Gnosca	53	non-S12	EU-12	MAT-1	192	230	243	111	197	280	130	252	256	207	Bryner and Rigling, Phytopathology 102, 2012		2010	PRJNA604575
M6757	Switzerland	Gnosca	53	non-S12	EU-12	MAT-2	192	230	243	102	197	279	130	255	268	207	Bryner and Rigling, Phytopathology 102, 2012		2010	PRJNA604575
M6776	Switzerland	Gnosca	53	non-S12	EU-12	MAT-1	192	230	243	111	197	280	130	255	268	207	Bryner and Rigling, Phytopathology 102, 2012		2010	PRJNA604575
M6807	Switzerland	Pura	55	non-S12	EU-01	MAT-2	192	230	111	216	265	274	148	252	256	207	Bryner and Rigling, Phytopathology 102, 2012		2010	PRJNA604575
M6821	Switzerland	Pura	55	non-S12	EU-12	MAT-1	192	218	265	111	197	280	148	255	268	190	Bryner and Rigling, Phytopathology 102, 2012		2010	PRJNA604575
M6873	Switzerland	Pura	55	non-S12	EU-02	MAT-2	192	230	111	216	243	280	130	252	268	207	Bryner and Rigling, Phytopathology 102, 2012		2010	PRJNA604575
M7120	Macedonia	Belasica	35	S12	EU-12	MAT-1	192	218	243	111	197	295	130	255	256	207	Sarah Bryner & Kiril Sotirovski		2010	PRJNA604575
M7296	Greece	Anelio	17	S12	EU-12	MAT-1	192	218	243	102	197	294	130	255	256	207	Sarah Bryner		2010	PRJNA604575
M7298	Greece	Anelio	17	S12	EU-12	MAT-1	192	218	243	102	197	294	130	255	256	207	Bryner and Rigling, Phytopathology, 102, 2012		2010	PRJNA604575
M7299	Greece	Anelio	17	S12	EU-12	MAT-1	192	218	243	102	197	294	130	255	256	207	Bryner and Rigling, Phytopathology, 102, 2012		2010	PRJNA604575
M7303	Greece	Anelio	17	S12	EU-12	MAT-1	192	218	243	111	197	295	130	255	256	207	Bryner and Rigling, Phytopathology, 102, 2012		2010	PRJNA604575
M7304	Greece	Anelio	17	S12	EU-12	MAT-1	192	218	243	102	197	294	130	255	256	207	Bryner and Rigling, Phytopathology, 102, 2012		2010	PRJNA604575
M7348	Switzerland	Pura	55	non-S12	EU-12	MAT-1	192	218	265	102	197	279	148	255	268	190	Bryner and Rigling, Phytopathology, 102, 2012		2008	PRJNA604575
M7361	Macedonia	Radolista	36	S12	EU-12	MAT-1	192	218	243	102	197	294	130	255	256	207	Bryner and Rigling, Phytopathology, 102, 2012		2010	PRJNA604575
M7363	Macedonia	Radolista	36	S12	EU-12	MAT-1	192	218	243	102	197	294	130	255	256	207	Bryner and Rigling, Phytopathology, 102, 2012		2010	PRJNA604575
M7368	Macedonia	Radolista	36	S12	EU-12	MAT-1	192	218	243	102	197	294	130	255	256	207	Bryner and Rigling, Phytopathology, 102, 2012		2010	PRJNA604575
M7373	Macedonia	Radolista	36	S12	EU-12	MAT-1	192	218	243	102	197	294	130	255	256	207	Bryner and Rigling, Phytopathology, 102, 2012		2010	PRJNA604575
M8074	Turkey	Bagcili-Nazilli	58	non-S12	EU-01	MAT-2	192	230	265	111	216	274	148	252	256	207	Secil Akilli		2015	PRJNA604575
M8076	Turkey	Derebasi-Nazilli	59	non-S12	EU-01	MAT-1	192	230	111	216	265	274	148	252	256	207	Secil Akilli		2015	PRJNA604575
M8082	Turkey	Malgacmustafa-Sultanhisar	62	non-S12	EU-01	MAT-1	192	230	111	216	265	274	148	252	256	207	Secil Akilli		2015	PRJNA604575
M8343	Turkey	Izmir	60	S12	EU-12	MAT-1	192	218	243	102	197	294	130	255	256	207	Secil Akilli		2015	PRJNA604575
M8515	South Korea	Jeollanam-do, Naju	NA		NA	MAT-1	194	230	243	104	270	268	142	255	238	188	Dr. Sang Hyun Lee		2011	PRJNA604575
M8539	South Korea	Jeollanam-do, Wando	NA		NA	MAT-1	192	234	308	96	197	268	146	258	250	190	Dr. Sang Hyun Lee		2011	PRJNA604575
M8652	Turkey	Izmir	60	S12	EU-12	MAT-1	192	218	243	102	197	294	130	255	256	207	Secil Akilli		2015	PRJNA604575
M8655	Turkey	Izmir	60	S12	EU-12	MAT-1	192	218	243	102	197	294	130	255	256	207	Secil Akilli		2015	PRJNA604575
M931	Switzerland	Somazzo	56	non-S12	EU-02	MAT-1	192	230	243	111	216	280	130	252	268	207	G. Bazzigher		1979	PRJNA604575
MA_14	Italy	Madonie	22	S12	EU-12	MAT-1	192	218	243	102	197	294	130	255	256	207	Milgroom et al. 2008		2003/2006	PRJNA604575
MA_20	Italy	Madonie	22	S12	EU-12	MAT-1	192	218	243	102	197	294	130	255	256	207	Milgroom et al. 2008		2003/2006	PRJNA604575
MA_36	Italy	Madonie	22	S12	EU-12	MAT-1	192	218	243	111	197	295	130	255	256	207	Milgroom et al. 2008		2003/2006	PRJNA604575
MA140	Italy	Madonie	22	non-S12	EU-02	MAT-1	192	230	111	216	243	280	130	252	268	207	Milgroom et al. 2008		2003/2006	PRJNA604575
MA149	Italy	Madonie	22	S12	EU-12	MAT-1	192	218	243	111	197	295	130	255	256	207	Milgroom et al. 2008		2003/2006	PRJNA604575
MA213	Italy	Madonie	22	S12	EU-12	MAT-1	192	218	243	111	197	295	130	255	256	207	Milgroom et al. 2008		2003/2006	PRJNA604575
MAK23	Georgia	Mackhunceti	16	non-S12	EU-12	MAT-2	192	230	243	111	216	295	130	255	256	207	Archil Supatashvili		2010	PRJNA604575
MIL15	Serbia	Milivojce	41	S12	EU-12	MAT-1	192	218	243	111	197	295	130	255	256	207	Kiril Sotirovski		2018	PRJNA604575
Mul59	Kosovo	Molliq	29	non-S12	EU-12	MAT-2	192	218	243	102	197	294	130	255	256	207	Kiril Sotirovski		2015	PRJNA604575
Mul63B	Kosovo	Molliq	29	S12	EU-12	MAT-1	192	218	243	102	197	294	130	255	256	207	Kiril Sotirovski		2015	PRJNA604575
NE155	Italy	Nebrodi	23	non-S12	EU-02	MAT-1	192	230	111	216	243	280	130	252	268	207	Milgroom et al. 2008		2003/2006	PRJNA604575
NE164	Italy	Nebrodi	23	non-S12	EU-12	MAT-2	192	218	243	102	197	294	130	255	256	207	Milgroom et al. 2008		2003/2006	PRJNA604575
NE182	Italy	Nebrodi	23	non-S12	EU-12	MAT-2	192	218	243	102	197	294	130	255	256	207	Milgroom et al. 2008		2003/2006	PRJNA604575
NE183	Italy	Nebrodi	23	S12	EU-12	MAT-1	192	218	243	102	197	294	130	255	256	207	Milgroom et al. 2008		2003/2006	PRJNA604575
NE200	Italy	Nebrodi	23	non-S12	EU-02	MAT-1	192	230	111	216	243	280	130	252	268	207	Milgroom et al. 2008		2003/2006	PRJNA604575
NE202	Italy	Nebrodi	23	S12	EU-12	MAT-1	192	218	243	111	197	295	130	255	256	207	Milgroom et al. 2008		2003/2006	PRJNA604575
NE230	Italy	Nebrodi	23	non-S12	EU-01	MAT-1	192	230	111	216	265	274	148	252	256	207	Milgroom et al. 2008		2003/2006	PRJNA604575
NE234	Italy	Nebrodi	23	non-S12	EU-01	MAT-1	192	230	111	216	265	274	148	252	256	207	Milgroom et al. 2008		2003/2006	PRJNA604575
NE240	Italy	Nebrodi	23	S12	EU-12	MAT-1	192	218	243	111	197	295	130	255	256	207	Milgroom et al. 2008		2003/2006	PRJNA604575
OC03	Slovenia	Ostrovica	44	non-S12	EU-13	MAT-2	192	230	243	111	197	295	130	255	256	190	Krstin et al. 2011		2004	PRJNA604575
OC1	Slovenia	Ostrovica	44	non-S12	EU-15	MAT1+2	192	230	243	111	216	295	130	252	256	207	Krstin et al. 2011		2004	PRJNA604575
OS12	Macedonia	Osoj	39	non-S12	EU-02	MAT-1	192	230	111	216	243	280	130	252	268	207	Milgroom et al. 2008		1998	PRJNA604575
OS14	Macedonia	Osoj	39	non-S12	EU-02	MAT-1	192	230	111	216	243	280	130	252	268	207	Milgroom et al. 2008		1998	PRJNA604575
OS29	Macedonia	Osoj	39	non-S12	EU-02	MAT-1	192	230	111	216	243	280	130	252	268	207	Milgroom et al. 2008		1998	PRJNA604575
OS30	Macedonia	Osoj	39	non-S12	EU-02	MAT-1	192	230	111	216	243	280	130	252	268	207	Milgroom et al. 2008		1998	PRJNA604575
OZ07C	Croatia	Ostrovica	14	non-S12	EU-01	MAT-2	192	230	265	111	216	274	148	252	256	207	Jezic 2018		2014	PRJNA604575
OZ09A	Croatia	Ostrovica	14	non-S12	EU-02	MAT-1	192	218	265	111	216	274	148	255	256	207	Jezic 2018		2014	PRJNA604575
OZ09C	Croatia	Ostrovica	14	non-S12	EU-17	MAT-1	192	230	243	111	216	280	148	252	268	207	Jezic 2018		2014	PRJNA604575
PA_90	Italy	Palermo	24	S12	EU-12	MAT-1	192	218	243	102	197	294	130	255	256	207	Milgroom et al. 2008		2003	PRJNA604575
PA225	Italy	Palermo	24	S12	EU-12	MAT-1	192	218	243	111	197	295	130	255	256	207	Milgroom et al. 2008		2003	PRJNA604575
PA59	Italy	Palermo	24	S12	EU-12	MAT-1	192	218	243	102	197	294	130	255	256	207	Milgroom et al. 2008		2003	PRJNA604575
Pe27	Kosovo	Pec	30	S12	EU-12	MAT-1	192	218	243	102	197	294	130	255	256	207	Kiril Sotirovski		2015	PRJNA604575
PE44	Kosovo	Pec	30	S12	EU-12	MAT-1	192	218	243	114	197	295	130	255	256	207	Kiril Sotirovski		2015	PRJNA604575
PLE10	Kosovo	Pleshine	31	S12	EU-12	MAT-1	192	218	243	102	197	294	130	255	256	207	Kiril Sotirovski		2015	PRJNA604575
PLE21	Kosovo	Pleshine	31	S12	EU-12	MAT-1	192	218	243	111	197	295	130	255	256	207	Kiril Sotirovski		2015	PRJNA604575
PLE35	Kosovo	Pleshine	31	S12	EU-12	MAT-1	192	218	243	102	197	294	130	255	256	207	Kiril Sotirovski		2015	PRJNA604575
PLE56B	Kosovo	Pleshine	31	S12	EU-12	MAT-1	192	218	243	102	197	294	130	255	256	207	Kiril Sotirovski		2015	PRJNA604575
PO10	Macedonia	Poroj	40	S12	EU-12	MAT-1	192	218	243	102	197	294	130	255	256	207	Milgroom et al. 2008		1995-2000	PRJNA604575
PO11	Kosovo	Pouska	32	S12	EU-12	MAT-1	192	218	243	102	197	296	130	255	256	207	Kiril Sotirovski		2015	PRJNA604575
PO14	Kosovo	Pouska	32	S12	EU-12	MAT-1	192	218	243	102	197	294	130	255	256	207	Kiril Sotirovski		2015	PRJNA604575
PO21	Kosovo	Pouska	32	S12	EU-12	MAT-1	192	218	243	102	197	294	130	255	256	207	Kiril Sotirovski		2015	PRJNA604575
PO42B	Kosovo	Pouska	32	S12	EU-12	MAT-1	192	218	243	102	197	294	130	255	256	207	Kiril Sotirovski		2015	PRJNA604575
PO8	Macedonia	Poroj	40	S12	EU-12	MAT-1	192	218	243	102	197	294	130	255	256	207	Milgroom et al. 2008		1995-2000	PRJNA604575
PR46	Kosovo	Prizren	33	S12	EU-12	MAT-1	192	218	243	102	197	294	130	255	256	207	Kiril Sotirovski		2015	PRJNA604575
PR48	Kosovo	Prizren	33	S12	EU-12	MAT-1	192	218	243	111	197	295	130	255	256	207	Kiril Sotirovski		2015	PRJNA604575
PR56	Kosovo	Prizren	33	S12	EU-12	MAT-1	192	218	243	102	197	294	130	255	256	207	Kiril Sotirovski		2015	PRJNA604575
SOB10	Serbia	Sobina	42	S12	EU-12	MAT-1	192	218	243	111	197	295	130	255	256	207	Kiril Sotirovski		2018	PRJNA604575
Ste02	Kosovo	Strelc	34	S12	EU-12	MAT-1	192	218	243	102	197	294	130	255	256	207	Kiril Sotirovski		2015	PRJNA604575
Ste04	Kosovo	Strelc	34	S12	EU-12	MAT-1	192	218	243	102	197	294	130	255	256	207	Kiril Sotirovski		2015	PRJNA604575
Ste13	Kosovo	Strelc	34	S12	EU-12	MAT-1	192	218	243	102	197	294	130	255	256	207	Kiril Sotirovski		2015	PRJNA604575
Ste18	Kosovo	Strelc	34	S12	EU-12	MAT-1	192	218	243	102	197	294	130	255	256	207	Kiril Sotirovski		2015	PRJNA604575
TE34	Italy	Teano	25	S12	EU-12	MAT-1	192	218	243	102	197	294	130	255	256	207	Milgroom et al. 2008		1995	PRJNA604575
TE58	Italy	Teano	25	S12	EU-12	MAT-1	192	218	243	102	197	294	130	255	256	207	Milgroom et al. 2008		1995	PRJNA604575
TE59	Italy	Teano	25	S12	EU-12	MAT-1	192	218	243	102	197	294	130	255	256	207	Milgroom et al. 2008		1995	PRJNA604575
V09	Slovenia	Valterski Vrh	45	non-S12	EU-13	MAT-2	192	230	245	111	216	295	148	260	256	207	Krstin et al. 2011		2004	PRJNA604575
VT49pk	Macedonia	Vrutok	38	S12	EU-12	MAT-1	192	218	243	102	197	294	130	255	256	207	Milgroom et al. 2008		1995-2000	PRJNA604575
ZB05	Slovenia	Zgornji Boc	46	non-S12	EU-17	MAT-2	192	230	245	111	197	295	130	255	256	207	Krstin et al. 2011		2004	PRJNA604575
ZB06	Slovenia	Zgornji Boc	46	non-S12	EU-13	MAT-2	NA	NA	NA	111	216	295	130	255	256	190	Krstin et al. 2011		2004	PRJNA604575
BRU-2	USA	Butow, Pocahontas County, West Virginia			EU-07	MAT-1	NA	NA	NA	NA	NA	NA	NA	NA	NA	NA	Peever et al. 1997		1994	PRJNA644891
DU-2	USA	Depot Hill, Dutchess County, New York			EU-05	MAT-1	NA	NA	NA	NA	NA	NA	NA	NA	NA	NA	Milgroom and Lipari 1995		1990	PRJNA644891
ES-34	Japan	Esashi			NA	NA	NA	NA	NA	NA	NA	NA	NA	NA	NA	NA	Liu et al. 2003		1998	PRJNA644891
ES-8	Japan	Esashi			NA	NA	NA	NA	NA	NA	NA	NA	NA	NA	NA	NA	Liu et al. 2003		1998	PRJNA644891
LB86	China	Liyang-B, Jiangsu			NA	NA	NA	NA	NA	NA	NA	NA	NA	NA	NA	NA	Milgroom et al. 1996		1992	PRJNA644891
M1729	France	Castillon (Hte. Pyrénées)			NA	NA	NA	NA	NA	NA	NA	NA	NA	NA	NA	NA	Allemann et al. 1999		1975	PRJNA644891
M2135	Portugal	Guarda (Sabugal)		S12	EU-12	MAT-1	NA	NA	NA	NA	NA	NA	NA	NA	NA	NA	Helena Bragança		1995	PRJNA644891
M2141	Portugal	Valpaços (Corveria/Serapicos)			EU-11	MAT-2	NA	NA	NA	NA	NA	NA	NA	NA	NA	NA	Helena Bragança		1995	PRJNA644891
M2207	Spain	Catalonia, Selva			EU-12	MAT-2	NA	NA	NA	NA	NA	NA	NA	NA	NA	NA	Carlos Colinas		1996	PRJNA644891
M3077	Portugal	unknown			EU-11	MAT-2	NA	NA	NA	NA	NA	NA	NA	NA	NA	NA	Helena Bragança		unknown	PRJNA644891
M3904	France	Ardèche			EU-69	MAT-1	NA	NA	NA	NA	NA	NA	NA	NA	NA	NA	Robin et al. 2000		1995	PRJNA644891
M4316	France	Ganges (Hérault)			EU-02	MAT-1	NA	NA	NA	NA	NA	NA	NA	NA	NA	NA	Cécile Robin		1998	PRJNA644891
M4327	France	Ste. Fortunade (Corrèze)			EU-33	MAT-2	NA	NA	NA	NA	NA	NA	NA	NA	NA	NA	Cécile Robin		unknown	PRJNA644891
M4342	Spain	Valcarlos (Navarra)			NA	NA	NA	NA	NA	NA	NA	NA	NA	NA	NA	NA	Cécile Robin		2002	PRJNA644891
M4354	France	Doissat (Dordogne)			EU-17	MAT-2	NA	NA	NA	NA	NA	NA	NA	NA	NA	NA	Cécile Robin		2003	PRJNA644891
M5386	Spain	Leon			EU-01	MAT-1	NA	NA	NA	NA	NA	NA	NA	NA	NA	NA	Zamora et al. 2012		2005	PRJNA644891
M7776	Georgia	Pshaveli			EU-51	MAT-2	NA	NA	NA	NA	NA	NA	NA	NA	NA	NA	Rigling et al. 2018		2012	PRJNA644891
M7832	Georgia	Kumistavi			EU-18	MAT-2	NA	NA	NA	NA	NA	NA	NA	NA	NA	NA	Rigling et al. 2018		2012	PRJNA644891
M8109	Azerbaijan	Xirxatala Village, Qabala Region			NA	MAT-2	NA	NA	NA	NA	NA	NA	NA	NA	NA	NA	Dilzara Aghayeva /Jeffrey Wall		2011	PRJNA644891
M8166	Azerbaijan	Chinarli Village, Qakh Region			EU-51	MAT-1	NA	NA	NA	NA	NA	NA	NA	NA	NA	NA	Dilzara Aghayeva /Jeffrey Wall		2011	PRJNA644891
M8422	South Korea	Chungcheongnam-do(Chungnam), Gongju			NA	NA	NA	NA	NA	NA	NA	NA	NA	NA	NA	NA	Sang Hyun Lee		2011	PRJNA644891
M8444	South Korea	Gyeongsangbuk-do(Gyeongbuk), Cheongdo			NA	NA	NA	NA	NA	NA	NA	NA	NA	NA	NA	NA	Sang Hyun Lee		2011	PRJNA644891
M8499	South Korea	Gyeongsangnam-do(Geongnam), Hadong			NA	NA	NA	NA	NA	NA	NA	NA	NA	NA	NA	NA	Sang Hyun Lee		2011	PRJNA644891
M8510	South Korea	Jeollabuk-do(Jeonbuk), Sunchang			NA	NA	NA	NA	NA	NA	NA	NA	NA	NA	NA	NA	Sang Hyun Lee		2011	PRJNA644891
M8566	South Korea	Chungcheongbuk-do(Chungbuk), Chungju			NA	NA	NA	NA	NA	NA	NA	NA	NA	NA	NA	NA	Sang Hyun Lee		2011	PRJNA644891
M8568	South Korea	Gyeonggi-do, Yeoju			NA	NA	NA	NA	NA	NA	NA	NA	NA	NA	NA	NA	Sang Hyun Lee		2011	PRJNA644891
M9077	Azerbaijan	Oghuz, Khachmaz			EU-51	MAT-1	NA	NA	NA	NA	NA	NA	NA	NA	NA	NA	Dilzara Aghayeva		2016	PRJNA644891
MD-1	USA	Finzel, Allegany County, Maryland			EU-25	MAT-2	NA	NA	NA	NA	NA	NA	NA	NA	NA	NA	Milgroom and Lipari 1995		1991	PRJNA644891
NH-4	USA	Concord, Merrimack County, New Hampshire			EU-30	MAT-2	NA	NA	NA	NA	NA	NA	NA	NA	NA	NA	Milgroom and Lipari 1995		1993	PRJNA644891
OB5-15	Japan	Obuse			NA	NA	NA	NA	NA	NA	NA	NA	NA	NA	NA	NA	Liu et al. 2003		1998	PRJNA644891
OB5-35	Japan	Obuse			NA	NA	NA	NA	NA	NA	NA	NA	NA	NA	NA	NA	Liu et al. 2003		1998	PRJNA644891
OK-17	Japan	Okoba			NA	NA	NA	NA	NA	NA	NA	NA	NA	NA	NA	NA	Liu et al. 2003		1998	PRJNA644891
OK-26	Japan	Okoba			NA	NA	NA	NA	NA	NA	NA	NA	NA	NA	NA	NA	Liu et al. 2003		1998	PRJNA644891
S31	China	Shucheng, Anhui			NA	NA	NA	NA	NA	NA	NA	NA	NA	NA	NA	NA	Milgroom et al. 1996		1992	PRJNA644891
S35	China	Shucheng, Anhui			NA	NA	NA	NA	NA	NA	NA	NA	NA	NA	NA	NA	Milgroom et al. 1996		1992	PRJNA644891
TA51	China	Taian-A, Shandong			NA	NA	NA	NA	NA	NA	NA	NA	NA	NA	NA	NA	Milgroom et al. 1996		1992	PRJNA644891
TA59	China	Taian-A, Shandong			NA	NA	NA	NA	NA	NA	NA	NA	NA	NA	NA	NA	Milgroom et al. 1996		1992	PRJNA644891
WB-3	Japan	Wanabe			NA	NA	NA	NA	NA	NA	NA	NA	NA	NA	NA	NA	Liu et al. 2003		1998	PRJNA644891
WB-9	Japan	Wanabe			NA	NA	NA	NA	NA	NA	NA	NA	NA	NA	NA	NA	Liu et al. 2003		1998	PRJNA644891
XA10	China	Xiuning-A, Anhui			NA	NA	NA	NA	NA	NA	NA	NA	NA	NA	NA	NA	Milgroom et al. 1996		1992	PRJNA644891
XA19	China	Xiuning-A, Anhui			NA	NA	NA	NA	NA	NA	NA	NA	NA	NA	NA	NA	Milgroom et al. 1996		1992	PRJNA644891
ZW-22	Switzerland	Adligenswil (LU)			EU-10	NA	NA	NA	NA	NA	NA	NA	NA	NA	NA	NA	Francesca Dennert		2018	PRJNA644891
