# Supplementary material for: Emergence and diversification of a highly invasive chestnut pathogen lineage across southeastern Europe
Source: eLife. 2021 Mar 5;10:e56279. doi: 10.7554/eLife.56279 (PMC7935491; doi:10.7554/eLife.56279)
Supplement: Supplementary file 2. — Cluster names correspond to clusters as shown in Figure 1A. [file elife-56279-supp2.xlsx]

## Sheet: Table1
Cluster	Model	Initial parameters	Best-fit parameters	Theta	Likelihood	AIC
CL3+CL4	Constant	-	-	1688.9	-1827	3656
CL3+CL4	Constant	-	-	1688.9	-1827	3656
CL3+CL4	Constant	-	-	1688.9	-1827	3656
CL3+CL4	Constant	-	-	1688.9	-1827	3656
CL3+CL4	Constant	-	-	1688.9	-1827	3656
CL3+CL4	Constant	-	-	1688.9	-1827	3656
CL3+CL4	Constant	-	-	1688.9	-1827	3656
CL3+CL4	Constant	-	-	1688.9	-1827	3656
CL3+CL4	Constant	-	-	1688.9	-1827	3656
CL3+CL4	Constant	-	-	1688.9	-1827	3656
CL3+CL4	Constant	-	-	1688.9	-1827	3656
CL3+CL4	Constant	-	-	1688.9	-1827	3656
CL3+CL4	Constant	-	-	1688.9	-1827	3656
CL3+CL4	Constant	-	-	1688.9	-1827	3656
CL3+CL4	Constant	-	-	1688.9	-1827	3656
CL3+CL4	Constant	-	-	1688.9	-1827	3656
CL3+CL4	Constant	-	-	1688.9	-1827	3656
CL3+CL4	Constant	-	-	1688.9	-1827	3656
CL3+CL4	Constant	-	-	1688.9	-1827	3656
CL3+CL4	Constant	-	-	1688.9	-1827	3656
CL3+CL4	Constant	-	-	1688.9	-1827	3656
CL3+CL4	Constant	-	-	1688.9	-1827	3656
CL3+CL4	Constant	-	-	1688.9	-1827	3656
CL3+CL4	Constant	-	-	1688.9	-1827	3656
CL3+CL4	Constant	-	-	1688.9	-1827	3656
CL3+CL4	Constant	-	-	1688.9	-1827	3656
CL3+CL4	Constant	-	-	1688.9	-1827	3656
CL3+CL4	Constant	-	-	1688.9	-1827	3656
CL3+CL4	Constant	-	-	1688.9	-1827	3656
CL3+CL4	Constant	-	-	1688.9	-1827	3656
CL3+CL4	Constant	-	-	1688.9	-1827	3656
CL3+CL4	Constant	-	-	1688.9	-1827	3656
CL3+CL4	Constant	-	-	1688.9	-1827	3656
CL3+CL4	Constant	-	-	1688.9	-1827	3656
CL3+CL4	Constant	-	-	1688.9	-1827	3656
CL3+CL4	Constant	-	-	1688.9	-1827	3656
CL3+CL4	Constant	-	-	1688.9	-1827	3656
CL3+CL4	Constant	-	-	1688.9	-1827	3656
CL3+CL4	Constant	-	-	1688.9	-1827	3656
CL3+CL4	Constant	-	-	1688.9	-1827	3656
CL3+CL4	Constant	-	-	1688.9	-1827	3656
CL3+CL4	Constant	-	-	1688.9	-1827	3656
CL3+CL4	Constant	-	-	1688.9	-1827	3656
CL3+CL4	Constant	-	-	1688.9	-1827	3656
CL3+CL4	Constant	-	-	1688.9	-1827	3656
CL3+CL4	Constant	-	-	1688.9	-1827	3656
CL3+CL4	Constant	-	-	1688.9	-1827	3656
CL3+CL4	Constant	-	-	1688.9	-1827	3656
CL3+CL4	Constant	-	-	1688.9	-1827	3656
CL3+CL4	Constant	-	-	1688.9	-1827	3656
CL3+CL4	Expansion	112.31649320849877;1861.022454597396	911.6053053594339;236.96344322602292	5.31337	-281.914	569.827
CL3+CL4	Expansion	155.14278471632616;1604.0853623963344	986.9776857822793;256.73745423932036	4.90621	-282.097	570.195
CL3+CL4	Expansion	571.7175901924358;598.2967420256724	24.636714403876603;1.2514812066784315	493.262	-32.2027	70.4053
CL3+CL4	Expansion	989.380829807013;1645.1801332952627	989.3808298070126;1645.180133295263	2.01246	-1482.09	2970.19
CL3+CL4	Expansion	103.29388129620123;1407.8814468246048	758.0964530379109;197.03564372204218	6.38712	-281.432	568.865
CL3+CL4	Expansion	44.50368219129593;1489.508353911553	44.50368219129594;1489.5083539115535	37.9497	-1827	3660
CL3+CL4	Expansion	932.4692766624582;1173.0319840754908	932.4692766624584;1173.031984075491	2.34432	-1284.53	2575.05
CL3+CL4	Expansion	116.4577018980152;799.6278443836034	24.63768745294149;1.2513713718549444	493.285	-32.2027	70.4053
CL3+CL4	Expansion	474.93760485805467;785.9506890292407	24.637687193751365;1.2513713547305432	493.285	-32.2027	70.4053
CL3+CL4	Expansion	254.60498692978095;450.61469512250807	24.637488434050983;1.2514905877109608	493.258	-32.2027	70.4053
CL3+CL4	Expansion	152.01251143414453;1142.0984475141827	822.2638070951605;213.79148631893784	5.88849	-281.654	569.307
CL3+CL4	Expansion	354.6702039546355;203.49738839115727	24.63965082233243;1.251323418085379	493.292	-32.2027	70.4053
CL3+CL4	Expansion	128.76003547550607;315.55703156672797	24.63743250393176;1.2513986279804374	493.28	-32.2027	70.4053
CL3+CL4	Expansion	88.52508948487623;510.4421779675188	24.63906696298559;1.2513416554121977	493.289	-32.2027	70.4053
CL3+CL4	Expansion	302.8274574959221;286.080298271868	24.640774547000095;1.2512513630667166	493.306	-32.2027	70.4053
CL3+CL4	Expansion	898.3756689330597;1370.9098452846447	898.3756689330595;1370.9098452846451	2.2759	-1425.92	2857.84
CL3+CL4	Expansion	249.24898656580376;772.194328627666	24.638511119117762;1.2513504333922325	493.288	-32.2027	70.4053
CL3+CL4	Expansion	100.15152544429186;419.5132965765278	24.63830594110801;1.251625203334425	493.223	-32.2026	70.4053
CL3+CL4	Expansion	705.5654244420423;887.9319022622241	705.5654244420425;887.9319022622237	3.09747	-1285.04	2576.08
CL3+CL4	Expansion	942.9495109455723;1028.944847350061	942.949510945572;1028.944847350061	2.44928	-1169.41	2344.82
CL3+CL4	Expansion	252.40962611590953;120.1463943876293	24.637687433597698;1.251371367484075	493.285	-32.2027	70.4053
CL3+CL4	Expansion	489.6321732306827;1508.8357569148134	489.63217323068284;1508.8357569148134	3.5811	-1749.3	3504.61
CL3+CL4	Expansion	960.335929889247;297.27114073200346	24.63768743881355;1.2513713699607194	493.285	-32.2027	70.4053
CL3+CL4	Expansion	569.6992637531579;1277.8714942860747	569.6992637531581;1277.8714942860752	3.2399	-1641.99	3289.98
CL3+CL4	Expansion	535.8185160604573;929.4465957954279	535.8185160604571;929.4465957954276	3.67005	-1508.42	3022.83
CL3+CL4	Expansion	392.4084370282166;1324.7425686121978	392.4084370282167;1324.7425686121974	4.42526	-1769.45	3544.9
CL3+CL4	Expansion	909.7026095416189;82.31114818309648	24.640107926091908;1.2516449094509954	493.214	-32.2026	70.4053
CL3+CL4	Expansion	841.5480690621745;715.4601044738012	841.5480690621742;715.4601044738014	3.05233	-954.195	1914.39
CL3+CL4	Expansion	349.41000685949797;1997.9503394747028	349.41000685949797;1997.9503394747037	4.84641	-1821.53	3649.05
CL3+CL4	Expansion	427.60399978817406;1186.5515501003374	427.60399978817395;1186.5515501003372	4.15738	-1720.64	3447.27
CL3+CL4	Expansion	482.1939836994151;1773.6820640701603	482.1939836994152;1773.6820640701608	3.57504	-1784.61	3575.22
CL3+CL4	Expansion	21.690153352793285;382.14209123452656	24.637687448739396;1.2513713714258337	493.285	-32.2027	70.4053
CL3+CL4	Expansion	313.01590300038487;1949.7876730079279	313.01590300038475;1949.7876730079286	5.40416	-1823.72	3653.43
CL3+CL4	Expansion	646.5379341820969;621.3918839041994	24.645284988321883;1.2512772095444045	493.288	-32.2026	70.4053
CL3+CL4	Expansion	266.94494299084397;1436.8739986996188	266.9449429908439;1436.8739986996186	6.35024	-1819.35	3644.71
CL3+CL4	Expansion	277.1637857999542;1731.093091579703	277.1637857999541;1731.0930915797035	6.10304	-1823.77	3653.54
CL3+CL4	Expansion	439.8474721849334;1697.7115743463792	439.84747218493357;1697.7115743463798	3.90583	-1791.71	3589.42
CL3+CL4	Expansion	515.3087400735992;711.1811839382456	24.640621333917906;1.2519496893570612	493.14	-32.2026	70.4053
CL3+CL4	Expansion	827.7977165330129;1666.3933739620754	827.7977165330129;1666.3933739620747	2.28464	-1590.82	3187.63
CL3+CL4	Expansion	480.10071412166286;1464.9926279708604	480.1007141216627;1464.9926279708611	3.65645	-1746.88	3499.75
CL3+CL4	Expansion	716.277353115687;1586.7244110241663	716.2773531156871;1586.7244110241663	2.58374	-1636.42	3278.83
CL3+CL4	Expansion	533.925424475834;1131.7905686313304	533.9254244758342;1131.79056863133	3.49951	-1616.29	3238.59
CL3+CL4	Expansion	212.30530752725141;590.771688032189	24.637647584813777;1.2513889588452929	493.281	-32.2027	70.4053
CL3+CL4	Expansion	782.1051509942655;799.1345628373914	782.1051509942657;799.1345628373912	3.03316	-1114.06	2234.11
CL3+CL4	Expansion	589.6223253530183;451.3343388105289	24.637862769430882;1.2513801074044877	493.283	-32.2027	70.4053
CL3+CL4	Expansion	711.4230126856697;879.3336167412708	711.4230126856695;879.333616741271	3.09263	-1270.93	2547.86
CL3+CL4	Expansion	796.2137217414686;673.081727442975	24.637535363420227;1.2513838559871016	493.283	-32.2027	70.4053
CL3+CL4	Expansion	164.10090286524482;1692.069706355709	164.10090286524482;1692.0697063557086	10.2921	-1826.94	3659.89
CL3+CL4	Expansion	959.6887811146502;182.59568035143636	24.63555341588189;1.251657252744575	493.223	-32.2027	70.4053
CL3+CL4	Expansion	437.97807826390397;1482.029280977222	437.97807826390385;1482.0292809772222	3.96398	-1769.89	3545.78
CL3+CL4	Bottleneck	0.197384896454119;1780.9032322856397	0.19738489645411897;1780.9032322856403	8556.38	-1827	3660
CL3+CL4	Bottleneck	0.47442818255989033;537.3529169275904	0.47442818255989033;537.3529169275906	3559.87	-1827	3660
CL3+CL4	Bottleneck	0.12778600995859946;503.40520568652767	0.12778600995859943;503.40520568652755	13216.6	-1827	3660
CL3+CL4	Bottleneck	0.21797492264278331;62.73288138042887	0.21797492264278331;62.732881380428886	7748.14	-1827	3660
CL3+CL4	Bottleneck	0.1078721878055713;41.05934208225182	0.1078721878055713;41.05934208225181	15656.5	-1827	3660
CL3+CL4	Bottleneck	0.7974930654206456;1290.7202161590326	0.7974930654206456;1290.7202161590328	2117.76	-1827	3660
CL3+CL4	Bottleneck	0.90965865022439;1099.766203507061	0.90965865022439;1099.7662035070614	1856.63	-1827	3660
CL3+CL4	Bottleneck	0.7507969293372403;25.30211987590203	0.7507969293372403;25.302119875902026	2249.48	-1827	3660
CL3+CL4	Bottleneck	0.6490715910101215;1006.4773921299773	0.6490715910101215;1006.4773921299775	2602.02	-1827	3660
CL3+CL4	Bottleneck	0.4949449097412203;849.3301413950329	0.4949449097412203;849.3301413950326	3412.3	-1827	3660
CL3+CL4	Bottleneck	0.2164568112991452;1251.3791249636968	0.2164568112991452;1251.379124963697	7802.48	-1827	3660
CL3+CL4	Bottleneck	0.5758741607363757;1103.9476311851174	0.5758741607363757;1103.9476311851176	2932.76	-1827	3660
CL3+CL4	Bottleneck	0.9825999759775363;802.4499554477518	0.9825999759775363;802.4499554477521	1718.81	-1827	3660
CL3+CL4	Bottleneck	0.168516792202618;1388.701917463155	0.168516792202618;1388.701917463155	10022.1	-1827	3660
CL3+CL4	Bottleneck	0.9707007145224457;1518.9664981350293	0.9707007145224457;1518.966498135029	1739.88	-1827	3660
CL3+CL4	Bottleneck	0.7289800540188759;1055.800986951347	0.7289800540188759;1055.8009869513469	2316.8	-1827	3660
CL3+CL4	Bottleneck	0.6823700145796621;1288.3377698116979	0.6823700145796621;1288.3377698116974	2475.05	-1827	3660
CL3+CL4	Bottleneck	0.5964412689311752;477.8504276445299	0.5964412689311752;477.8504276445298	2831.63	-1827	3660
CL3+CL4	Bottleneck	0.5178597571523798;1277.2569002506248	0.5178597571523798;1277.2569002506248	3261.31	-1827	3660
CL3+CL4	Bottleneck	0.022328661737170675;1646.2213944290045	0.022328661737170675;1646.221394429005	75638.2	-1827	3660
CL3+CL4	Bottleneck	0.3587264153041122;1185.5412907981136	0.35872641530411226;1185.5412907981133	4708.05	-1827	3660
CL3+CL4	Bottleneck	0.30253247992410026;1069.9877996181058	0.30253247992410026;1069.987799618106	5582.54	-1827	3660
CL3+CL4	Bottleneck	0.14039375176523433;1721.3735312929766	0.14039375176523433;1721.373531292976	12029.7	-1827	3660
CL3+CL4	Bottleneck	0.7605868911678676;1475.560207007619	0.7605868911678676;1475.5602070076193	2220.52	-1827	3660
CL3+CL4	Bottleneck	0.020344518733397838;1100.7763281627488	0.020344518733397838;1100.7763281627488	83015	-1827	3660
CL3+CL4	Bottleneck	0.36925922945867956;1054.748286299614	0.36925922945867956;1054.7482862996142	4573.75	-1827	3660
CL3+CL4	Bottleneck	0.5216612574896242;1822.139488721026	0.5216612574896242;1822.1394887210265	3237.54	-1827	3660
CL3+CL4	Bottleneck	0.04086407118318043;1806.9600151852867	0.04086407118318044;1806.960015185287	41329.7	-1827	3660
CL3+CL4	Bottleneck	0.2746222531843155;1097.0483366644364	0.2746222531843155;1097.048336664436	6149.9	-1827	3660
CL3+CL4	Bottleneck	0.8856836187725488;32.30744645960826	0.8856836187725488;32.30744645960826	1906.89	-1827	3660
CL3+CL4	Bottleneck	0.9678327691292623;1951.1382105779896	0.9678327691292623;1951.1382105779903	1745.03	-1827	3660
CL3+CL4	Bottleneck	0.5091345800163025;718.4668402141061	0.5091345800163025;718.4668402141058	3317.2	-1827	3660
CL3+CL4	Bottleneck	0.4090192421341284;1117.4874609847452	0.4090192421341284;1117.4874609847457	4129.15	-1827	3660
CL3+CL4	Bottleneck	0.9097387000990627;396.25789027048074	0.9097387000990627;396.25789027048074	1856.47	-1827	3660
CL3+CL4	Bottleneck	0.18860072855525503;339.15393571108086	0.18860072855525503;339.153935711081	8954.9	-1827	3660
CL3+CL4	Bottleneck	0.6681440318321742;647.1381556596197	0.6681440318321742;647.1381556596197	2527.75	-1827	3660
CL3+CL4	Bottleneck	0.25204115659272075;861.0044018955211	0.25204115659272075;861.0044018955209	6700.89	-1827	3660
CL3+CL4	Bottleneck	0.8873480726434747;334.1754791118372	0.8873480726434747;334.17547911183726	1903.31	-1827	3660
CL3+CL4	Bottleneck	0.28806196207725643;1976.5442454654374	0.2880619620772564;1976.5442454654378	5862.98	-1827	3660
CL3+CL4	Bottleneck	0.856758593191478;338.4132193311762	0.856758593191478;338.41321933117615	1971.27	-1827	3660
CL3+CL4	Bottleneck	0.6259474744833029;875.9964545669503	0.6259474744833029;875.9964545669504	2698.15	-1827	3660
CL3+CL4	Bottleneck	0.5671232275363872;949.738808066975	0.5671232275363872;949.7388080669754	2978.01	-1827	3660
CL3+CL4	Bottleneck	0.8087810579847031;58.55049068684237	0.8087810579847031;58.55049068684236	2088.2	-1827	3660
CL3+CL4	Bottleneck	0.21797092093041306;1213.7205556068177	0.21797092093041304;1213.7205556068177	7748.28	-1827	3660
CL3+CL4	Bottleneck	0.11491291983541485;215.75237261434467	0.11491291983541484;215.7523726143446	14697.2	-1827	3660
CL3+CL4	Bottleneck	0.37401054204234596;1553.6148675186348	0.37401054204234596;1553.6148675186346	4515.65	-1827	3660
CL3+CL4	Bottleneck	0.8658041269346505;987.4959709565713	0.8658041269346505;987.4959709565711	1950.67	-1827	3660
CL3+CL4	Bottleneck	0.5957661857792066;1236.5945092637805	0.5957661857792066;1236.59450926378	2834.84	-1827	3660
CL3+CL4	Bottleneck	0.25874544999485094;950.2590813165064	0.25874544999485094;950.2590813165062	6527.27	-1827	3660
CL3+CL4	Bottleneck	0.9603052390833615;1237.5136137698119	0.9603052390833615;1237.513613769812	1758.71	-1827	3660
CL3+CL4	Bottleneck_expansion	0.8021949487152125;1107.9826664230497;90.17266369026419;357.19661600915475	0.8021472185862825;1225.7993735699938;90.17266369026422;322.7810890702226	3.92308	-282.909	575.817
CL3+CL4	Bottleneck_expansion	0.646731413008123;1865.221086818392;69.58751406835145;314.8396806318669	0.8845798989464417;1115.1216617894293;69.58751406835144;370.78864345299735	3.74625	-318.585	647.17
CL3+CL4	Bottleneck_expansion	0.7238330277163917;108.64426379205683;1.4835743579379224;465.18436965676057	0.7414486373938151;438.6520331940864;1.4789341065220927;117.56981777511781	10.8216	-281.33	572.66
CL3+CL4	Bottleneck_expansion	0.6073300464570839;1565.7611726970194;9.28330572945738;109.42520657651367	0.8551554088013631;214.47070232696203;9.28317924258534;51.611863332525445	23.5668	-275.991	561.983
CL3+CL4	Bottleneck_expansion	0.33948851276424574;1601.367085042435;20.396989755682316;215.79061384091852	0.34088530866648437;1147.5601616890583;20.396989755682316;300.03627868199465	4.21189	-283.664	577.329
CL3+CL4	Bottleneck_expansion	0.1827901049188659;946.4318706724886;50.37041334293071;409.62485824971765	0.24635751638081663;763.1997047816228;50.37041334293071;199.65747902134083	6.3305	-283.605	577.21
CL3+CL4	Bottleneck_expansion	0.6964003866263734;291.5952428438312;25.345235455538507;145.04122230976947	0.6952623682247717;402.31130614552785;25.345235455538504;105.2717440800252	11.9761	-280.672	571.345
CL3+CL4	Bottleneck_expansion	0.5441506274694206;1274.748870878256;92.39650715342347;68.90824834956338	0.0131940072890237;10.610769745361498;92.3965071534235;2.8474030522274623	447.459	-282.29	574.58
CL3+CL4	Bottleneck_expansion	0.6761769924511254;1166.3602207629683;72.81072254034771;129.34616337107428	0.7037223828929599;560.6427389669561;72.81072254034774;258.95527285543017	6.19395	-471.672	953.345
CL3+CL4	Bottleneck_expansion	0.5524565311624249;1829.1830918511425;91.46689234894204;42.51735361776421	0.14312562529899023;83.76107238201585;91.46689234877245;21.562699869067373	58.1099	-280.587	571.173
CL3+CL4	Bottleneck_expansion	0.6783109471934179;588.9736364228747;46.43941054352487;315.1047023751763	0.67777050838349;834.3507599167177;46.43941054352487;222.5684885748426	5.71592	-282.845	575.689
CL3+CL4	Bottleneck_expansion	0.8755265294966241;1439.1116511599841;0.8886375380879774;318.66434794726416	0.876281235418392;1326.0407423580002;0.888562730550405;345.30053865665946	3.65149	-282.783	575.565
CL3+CL4	Bottleneck_expansion	0.15729455597173922;1390.940702563224;27.7144698576287;128.32167138573723	0.9977594468891783;273.1380943874239;27.714469867004276;85.92657494581586	15.7315	-304.425	618.85
CL3+CL4	Bottleneck_expansion	0.45672706877895985;783.1312537719951;42.46138488217698;257.0945668598236	0.45669719759763777;861.4877944482279;42.46138488217697;233.62364132991257	5.48272	-283.911	577.822
CL3+CL4	Bottleneck_expansion	0.05252960845276729;1588.9067917720497;28.18523343463786;233.3694402533606	0.07102290077148052;1.6645525889512789;28.185233442785986;0.4265730799098756	2721.29	-262.393	534.785
CL3+CL4	Bottleneck_expansion	0.6685507297479316;249.33174272371247;8.610846191975563;476.2901670053542	0.8371982821383334;569.0662017553019;8.610806941935508;150.0845598779154	8.42957	-281.321	572.642
CL3+CL4	Bottleneck_expansion	0.24341589800689248;1190.4430251469244;39.49558960578534;148.79356360664235	0.21545939781163848;281.2509083479506;39.495589608130054;69.07638626069624	17.856	-285.064	580.128
CL3+CL4	Bottleneck_expansion	0.5052336599367044;502.99549822407147;77.98047644989906;195.08878779723915	0.5126958175062692;581.0171208122827;77.98047644989904;160.10921764883977	8.04467	-284.298	578.596
CL3+CL4	Bottleneck_expansion	0.9784300027308998;639.0026029542341;73.8697717569425;69.67559882961683	0.2985522099003187;429.9079074107726;73.8697717558962;111.99987093309718	11.2596	-282.799	575.598
CL3+CL4	Bottleneck_expansion	0.544744470503162;833.2736763737779;31.90879344877513;495.23189982506767	0.9222585763040175;642.2571777931414;31.908793448775135;159.79477143978377	7.74575	-282.154	574.308
CL3+CL4	Bottleneck_expansion	0.684271446874506;1343.2082260821035;3.551830066988948;61.49287244844876	0.20334236997912214;172.42457660475912;4.04383333540314;44.19588256854567	28.3336	-281.849	573.699
CL3+CL4	Bottleneck_expansion	0.44366076281602507;119.83011350043148;68.20073886015075;73.72418959559162	0.44164784388858735;245.29558457217328;68.20073886015074;36.17562631498694	28.7344	-458.535	927.07
CL3+CL4	Bottleneck_expansion	0.8750089142818683;382.0201698385194;40.7281785166005;450.3167544285074	0.8737839301609288;781.2766682085357;40.72817851660051;220.7553625675769	5.88933	-286.187	582.373
CL3+CL4	Bottleneck_expansion	0.4049625186147319;1647.4319803275391;90.8142245972666;373.7418149390382	0.40515905919630824;1530.1883906057783;90.81422459726657;402.12361983554416	3.14888	-283.715	577.43
CL3+CL4	Bottleneck_expansion	0.4378604806530276;1581.6595636410075;79.51832180128078;150.52203551200734	0.7733069290815996;597.7191885660934;79.5183218012808;227.9518346535522	6.45548	-369.522	749.044
CL3+CL4	Bottleneck_expansion	0.3971076670328772;813.9433996222656;89.99130213880804;181.991848433715	0.3974868191920442;755.422861599665;89.99130213880801;195.8770329884883	6.42868	-283.223	576.446
CL3+CL4	Bottleneck_expansion	0.29881869992389215;1987.6237191126506;70.65381893060369;5.948773072346036	0.666748540359075;1128.9094571168707;70.65381893060368;4.695510181263463	145.719	-1544.85	3099.71
CL3+CL4	Bottleneck_expansion	0.9396215840897018;1458.441465246739;93.98755485432233;433.16144155078234	0.939738641183653;1553.0362086241223;93.98755485432235;406.60840608406363	3.10778	-282.994	575.988
CL3+CL4	Bottleneck_expansion	0.3526449771355805;460.51637544197047;19.391584344073067;340.2862904370794	0.881749854390596;583.8076289060645;19.391584344073063;117.47496091359793	9.76792	-319.705	649.409
CL3+CL4	Bottleneck_expansion	0.8038015948449898;824.4057825823838;14.272845256552314;27.3438379168241	0.8038015948449898;824.405782582384;14.272845256552316;27.343837916824096	28.7156	-1529.26	3068.52
CL3+CL4	Bottleneck_expansion	0.5573332757495232;25.100728110126227;23.041688188322528;395.9753407165855	0.554313050409323;1133.8157908311423;23.041688188322524;9.318779403834212	76.9482	-2026	4061.99
CL3+CL4	Bottleneck_expansion	0.01840611463474387;809.5099655041887;99.75952923261839;80.54099207854154	0.038072267366004;0.8727185353453849;99.75952874746059;0.19076962901456102	5664.4	-218.035	446.071
CL3+CL4	Bottleneck_expansion	0.5338782414834881;997.8361632766046;29.632943982787864;205.11241560455352	0.5347459882320266;892.0813448234611;29.632943982787868;229.04832190959002	5.47659	-283.236	576.471
CL3+CL4	Bottleneck_expansion	0.8492413574828805;686.9967015607197;8.038037692090006;462.5829671931112	0.8480757015424455;1404.2049934578197;8.038039162119176;226.64147605548206	4.72831	-435.871	881.742
CL3+CL4	Bottleneck_expansion	0.5118118417016744;445.91265372781413;70.7677482742751;362.8776629445725	0.8304830374903169;703.6025316407736;70.76774827427509;144.50475402950124	8.00254	-316.42	642.84
CL3+CL4	Bottleneck_expansion	0.4880410924682728;1691.2034319351117;95.47823726699563;481.4354368373733	0.5672759561016977;1562.9195354986373;95.47823726699563;389.1791980842017	3.18801	-285.328	580.656
CL3+CL4	Bottleneck_expansion	0.3751135613527188;326.9482731060477;28.246162181540203;247.7092488203937	0.37469348905517347;668.2680807826403;28.246162181540203;121.36335765761284	9.16182	-371.115	752.231
CL3+CL4	Bottleneck_expansion	0.9262397334315273;1666.963675769049;96.84719138827104;390.54921044418126	0.9271025526301667;1575.6597902813683;96.847191388271;412.72762637045435	3.06235	-283.03	576.06
CL3+CL4	Bottleneck_expansion	0.7306705475686249;1424.9952304741394;77.70176610180357;440.5842403281748	0.7306892119385386;1545.2511022860172;77.70176610180357;406.1626816800719	3.1166	-283.277	576.554
CL3+CL4	Bottleneck_expansion	0.4626339589888284;1934.0587798119477;32.72989529084105;353.5688097393659	0.4632310565043439;1616.82239962631;32.72989529084105;422.4221684899448	2.99085	-283.691	577.383
CL3+CL4	Bottleneck_expansion	0.10024446256025733;323.05525607125196;5.821751800426666;360.73460902889207	0.0533075846443545;1.1460946269376766;5.842534456759162;0.24245314238715293	4368.34	-210.466	430.933
CL3+CL4	Bottleneck_expansion	0.3991337654400871;697.868364447809;52.852462068636264;307.38012114433195	0.39900414839005555;889.9415310715732;52.85246206863626;241.04730062099017	5.31216	-283.994	577.987
CL3+CL4	Bottleneck_expansion	0.2999572254264963;928.2419874158941;80.14161004210021;75.68366557332695	0.8823616644099935;281.5605894899644;80.14161004210021;85.3083228073327	15.617	-295.879	601.759
CL3+CL4	Bottleneck_expansion	0.44331817092246084;1405.744645785961;30.731394167740444;132.35681722769615	0.7764205362705797;529.8403440965969;30.73139416774044;199.44226731054326	7.33482	-364.005	738.009
CL3+CL4	Bottleneck_expansion	0.38485387446722746;1087.2517138720257;72.00838813837177;86.22964400027466	0.750857359500344;396.14378232016514;72.00838813827326;121.40153449080148	11.0467	-298.403	606.806
CL3+CL4	Bottleneck_expansion	0.2830691248024945;662.7405911442232;52.11434970573556;341.2326922901864	0.31711744333219566;393.167334269763;52.11434970577327;103.69239752711982	12.2159	-282.614	575.227
CL3+CL4	Bottleneck_expansion	0.11966001982759679;474.4753458925435;98.03999445007528;111.2481809640662	0.11970627964639216;450.0394473908784;98.03999445007531;117.22518113272632	10.7657	-283.758	577.516
CL3+CL4	Bottleneck_expansion	0.41494625664837625;604.4353827902254;26.469225765302383;351.7310327710234	0.7241653550995182;453.02279201568115;26.46922576530238;112.94700993751613	10.9635	-281.596	573.193
CL3+CL4	Bottleneck_expansion	0.03216348070990437;677.7470866617444;21.955408646039043;353.0135660408338	0.10460366661026914;3.80095831328113;21.955408646039043;0.9739216632989574	1224.43	-256.026	522.051
CL3+CL4	Bottleneck_expansion	0.9486445327310329;199.23180004302478;52.864080616202024;149.88628947231098	0.9442043118749013;407.68127918733444;52.86408061620202;73.52004976505896	15.0203	-348.999	707.999
CL2	Constant	-	-	1138.26	-667.743	1337.49
CL2	Constant	-	-	1138.26	-667.743	1337.49
CL2	Constant	-	-	1138.26	-667.743	1337.49
CL2	Constant	-	-	1138.26	-667.743	1337.49
CL2	Constant	-	-	1138.26	-667.743	1337.49
CL2	Constant	-	-	1138.26	-667.743	1337.49
CL2	Constant	-	-	1138.26	-667.743	1337.49
CL2	Constant	-	-	1138.26	-667.743	1337.49
CL2	Constant	-	-	1138.26	-667.743	1337.49
CL2	Constant	-	-	1138.26	-667.743	1337.49
CL2	Constant	-	-	1138.26	-667.743	1337.49
CL2	Constant	-	-	1138.26	-667.743	1337.49
CL2	Constant	-	-	1138.26	-667.743	1337.49
CL2	Constant	-	-	1138.26	-667.743	1337.49
CL2	Constant	-	-	1138.26	-667.743	1337.49
CL2	Constant	-	-	1138.26	-667.743	1337.49
CL2	Constant	-	-	1138.26	-667.743	1337.49
CL2	Constant	-	-	1138.26	-667.743	1337.49
CL2	Constant	-	-	1138.26	-667.743	1337.49
CL2	Constant	-	-	1138.26	-667.743	1337.49
CL2	Constant	-	-	1138.26	-667.743	1337.49
CL2	Constant	-	-	1138.26	-667.743	1337.49
CL2	Constant	-	-	1138.26	-667.743	1337.49
CL2	Constant	-	-	1138.26	-667.743	1337.49
CL2	Constant	-	-	1138.26	-667.743	1337.49
CL2	Constant	-	-	1138.26	-667.743	1337.49
CL2	Constant	-	-	1138.26	-667.743	1337.49
CL2	Constant	-	-	1138.26	-667.743	1337.49
CL2	Constant	-	-	1138.26	-667.743	1337.49
CL2	Constant	-	-	1138.26	-667.743	1337.49
CL2	Constant	-	-	1138.26	-667.743	1337.49
CL2	Constant	-	-	1138.26	-667.743	1337.49
CL2	Constant	-	-	1138.26	-667.743	1337.49
CL2	Constant	-	-	1138.26	-667.743	1337.49
CL2	Constant	-	-	1138.26	-667.743	1337.49
CL2	Constant	-	-	1138.26	-667.743	1337.49
CL2	Constant	-	-	1138.26	-667.743	1337.49
CL2	Constant	-	-	1138.26	-667.743	1337.49
CL2	Constant	-	-	1138.26	-667.743	1337.49
CL2	Constant	-	-	1138.26	-667.743	1337.49
CL2	Constant	-	-	1138.26	-667.743	1337.49
CL2	Constant	-	-	1138.26	-667.743	1337.49
CL2	Constant	-	-	1138.26	-667.743	1337.49
CL2	Constant	-	-	1138.26	-667.743	1337.49
CL2	Constant	-	-	1138.26	-667.743	1337.49
CL2	Constant	-	-	1138.26	-667.743	1337.49
CL2	Constant	-	-	1138.26	-667.743	1337.49
CL2	Constant	-	-	1138.26	-667.743	1337.49
CL2	Constant	-	-	1138.26	-667.743	1337.49
CL2	Constant	-	-	1138.26	-667.743	1337.49
CL2	Expansion	188.5536679868781;465.37647308226025	18.29740576094054;0.41099164393622956	614.351	-57.7807	121.561
CL2	Expansion	264.6117668186991;1340.4782278766745	18.277550477208848;0.4111050833449174	614.319	-57.7807	121.561
CL2	Expansion	775.4289175457358;355.77141717550506	18.289274145613007;0.41106581174963186	614.321	-57.7807	121.561
CL2	Expansion	259.6957303822287;540.5854805059429	18.273801596257826;0.4111266915814158	614.313	-57.7807	121.561
CL2	Expansion	280.1539639503402;729.6240970026482	18.299772696652752;0.4109827991404931	614.352	-57.7807	121.561
CL2	Expansion	320.7228280019961;775.5556625280216	18.303315006636016;0.4109736628129252	614.351	-57.7807	121.561
CL2	Expansion	950.018342955022;1186.4729529182648	950.0183429550223;1186.472952918265	1.55499	-424.454	854.907
CL2	Expansion	831.2325504183577;803.3512952551487	18.27380159017652;0.41112669313670963	614.313	-57.7807	121.561
CL2	Expansion	470.67337913206035;799.7613685335702	18.287540160041228;0.4108044598380885	614.491	-57.7806	121.561
CL2	Expansion	499.35069919752857;808.2808495390763	18.3006371789595;0.4109909381994326	614.345	-57.7807	121.561
CL2	Expansion	990.2719994526884;535.1037142184116	18.27399911650556;0.4111192708228418	614.318	-57.7807	121.561
CL2	Expansion	286.72906455108335;1488.8385316159377	18.300696721815196;0.4108788980165292	614.416	-57.7806	121.561
CL2	Expansion	272.1658942344543;1080.933902659842	18.273801529907253;0.41112669114144035	614.313	-57.7807	121.561
CL2	Expansion	343.2542520837239;1705.0071445182298	343.2542520837238;1705.0071445182296	3.33476	-662.309	1330.62
CL2	Expansion	537.5425126725797;1239.4179132831343	537.5425126725798;1239.4179132831343	2.30124	-587.665	1181.33
CL2	Expansion	645.3186858888309;241.50421201741557	18.30143632317983;0.41098347196194507	614.348	-57.7807	121.561
CL2	Expansion	954.6727155254324;899.7729633413403	954.6727155254329;899.7729633413404	1.73312	-332.877	671.754
CL2	Expansion	392.595311133875;271.4414300424248	18.273810406070773;0.41112639568986714	614.313	-57.7807	121.561
CL2	Expansion	563.160895282403;235.86706941794677	18.279808653829512;0.41091629350506137	614.435	-57.7807	121.561
CL2	Expansion	67.94979301528205;1160.6454642242682	18.27462436588191;0.41112052012289646	614.315	-57.7807	121.561
CL2	Expansion	999.1318910193245;1636.0784775494276	999.1318910193243;1636.078477549427	1.34928	-506.663	1019.33
CL2	Expansion	224.63142661132724;570.2622046840247	18.29996977519726;0.4109473602939858	614.374	-57.7807	121.561
CL2	Expansion	246.57599318180587;421.3409392236052	18.28428047412114;0.4109744466311403	614.389	-57.7807	121.561
CL2	Expansion	966.0595472865864;150.4970461150168	18.30318837014623;0.4109650378823558	614.356	-57.7807	121.561
CL2	Expansion	266.9366790683522;1049.5174694522823	18.288251977521334;0.411054766109167	614.33	-57.7807	121.561
CL2	Expansion	971.3149060924079;1450.7495259967209	971.3149060924081;1450.7495259967202	1.42861	-480.139	966.279
CL2	Expansion	631.0971391934211;1733.5174885313122	631.0971391934213;1733.5174885313127	1.90138	-616.808	1239.62
CL2	Expansion	287.448665182312;350.85539734836277	18.280202748195492;0.41110405878601186	614.315	-57.7807	121.561
CL2	Expansion	895.3614857596472;717.4257451686512	18.273801513779294;0.41112669175692035	614.313	-57.7807	121.561
CL2	Expansion	814.5936620486015;554.4019871257009	18.293628833507682;0.41101870544219843	614.342	-57.7807	121.561
CL2	Expansion	143.54540141360107;11.454983589756607	18.28401962340948;0.4110801964044375	614.322	-57.7807	121.561
CL2	Expansion	681.5291798999511;262.8090836450927	18.282586903041047;0.4110831351394946	614.323	-57.7807	121.561
CL2	Expansion	861.0685749229939;203.66587736774667	18.272905951665688;0.41110333250596104	614.33	-57.7807	121.561
CL2	Expansion	243.25149986392336;1707.2988806633766	937.0877485383684;446.35363566941214	2.45725	-198.252	402.505
CL2	Expansion	362.9293533207387;766.2327162423763	18.2985105396898;0.41080411479366097	614.469	-57.7806	121.561
CL2	Expansion	46.25977297135945;326.7598309732498	18.295817923271116;0.41074503896575454	614.512	-57.7806	121.561
CL2	Expansion	482.4387561563154;430.22309790931314	18.299856536286967;0.4107210474550031	614.519	-57.7806	121.561
CL2	Expansion	533.0119280539056;1326.90249093264	533.0119280539058;1326.9024909326401	2.28754	-601.47	1208.94
CL2	Expansion	22.791425954227954;1501.7720230901973	22.79142595422795;1501.772023090198	49.9426	-667.743	1341.49
CL2	Expansion	988.4506095002482;584.881220025327	988.450609500248;584.8812200253273	2.08203	-215.318	436.635
CL2	Expansion	276.60695031120537;799.2459623939077	18.27380185397829;0.41112669031647253	614.313	-57.7807	121.561
CL2	Expansion	481.46320237946094;1980.3021245249538	481.46320237946094;1980.302124524954	2.39566	-654.945	1315.89
CL2	Expansion	474.8783431527769;1904.1053583156151	474.87834315277684;1904.1053583156145	2.4324	-653.545	1313.09
CL2	Expansion	763.3751738295524;1451.5641192156231	763.3751738295526;1451.5641192156236	1.69358	-545.773	1097.55
CL2	Expansion	39.128862036093736;528.2715952908299	211.92157901028557;99.92284961313771	10.8835	-197.816	401.632
CL2	Expansion	801.6449562223878;1267.0606136825315	801.6449562223881;1267.0606136825315	1.69993	-496.707	999.415
CL2	Expansion	398.3082583123689;154.93311810194731	18.273803453018672;0.4111265897196272	614.313	-57.7807	121.561
CL2	Expansion	4.385373507358736;478.4187319112205	4.385373507358736;478.41873191122056	259.559	-667.743	1341.49
CL2	Expansion	377.17771849988395;1826.9751114712235	377.17771849988384;1826.975111471224	3.03708	-661.594	1329.19
CL2	Expansion	556.457890758491;593.2992747743256	18.273878453660622;0.4111252485526194	614.314	-57.7807	121.561
CL2	Bottleneck	0.6328063575113366;1008.2654772596635	0.6328063575113366;1008.2654772596634	1798.75	-667.743	1341.49
CL2	Bottleneck	0.9922361920426472;1667.8768101458163	0.9922361920426472;1667.8768101458163	1147.17	-667.743	1341.49
CL2	Bottleneck	0.44622082755374964;503.91974422111383	0.44622082755374964;503.91974422111383	2550.89	-667.743	1341.49
CL2	Bottleneck	0.5595276037328215;1757.3721188850714	0.5595276037328215;1757.3721188850718	2034.33	-667.743	1341.49
CL2	Bottleneck	0.8307245859925663;1141.3311989886124	0.8307245859925663;1141.3311989886122	1370.2	-667.743	1341.49
CL2	Bottleneck	0.06311741298483027;1461.4685423824299	0.06311741298483028;1461.4685423824303	18034	-667.743	1341.49
CL2	Bottleneck	0.5463700944550012;1618.5322984958145	0.5463700944550012;1618.532298495815	2083.32	-667.743	1341.49
CL2	Bottleneck	0.3819856249191887;1557.319228746604	0.3819856249191887;1557.3192287466043	2979.86	-667.743	1341.49
CL2	Bottleneck	0.49897466828082204;13.424707811297454	0.49897466828082204;13.424707811297452	2281.2	-667.743	1341.49
CL2	Bottleneck	0.5700267492265471;231.9521723710829	0.5700267492265471;231.95217237108298	1996.86	-667.743	1341.49
CL2	Bottleneck	0.8948928294051791;906.7930404087996	0.8948928294051791;906.7930404087994	1271.95	-667.743	1341.49
CL2	Bottleneck	0.662988142102237;48.60941212239278	0.662988142102237;48.60941212239278	1716.87	-667.743	1341.49
CL2	Bottleneck	0.2617542271723017;387.88873865221274	0.26175422717230173;387.88873865221274	4348.59	-667.743	1341.49
CL2	Bottleneck	0.5341955736827452;544.9178836448239	0.5341955736827452;544.9178836448241	2130.8	-667.743	1341.49
CL2	Bottleneck	0.17169808113731835;1880.7327542232254	0.17169808113731835;1880.7327542232251	6629.44	-667.743	1341.49
CL2	Bottleneck	0.9078828933008117;300.6997734569319	0.9078828933008117;300.69977345693195	1253.75	-667.743	1341.49
CL2	Bottleneck	0.13392556309004378;1861.3265979580767	0.13392556309004378;1861.3265979580774	8499.21	-667.743	1341.49
CL2	Bottleneck	0.7210905103542327;1230.0983798177372	0.7210905103542327;1230.0983798177372	1578.53	-667.743	1341.49
CL2	Bottleneck	0.9783154089792385;1342.6588958004404	0.9783154089792385;1342.6588958004404	1163.49	-667.743	1341.49
CL2	Bottleneck	0.9601128185930768;1907.4565170093501	0.9601128185930768;1907.45651700935	1185.55	-667.743	1341.49
CL2	Bottleneck	0.8476229701019551;197.54203705249185	0.8476229701019551;197.5420370524918	1342.89	-667.743	1341.49
CL2	Bottleneck	0.6247207762631124;108.4438373103147	0.6247207762631124;108.44383731031475	1822.03	-667.743	1341.49
CL2	Bottleneck	0.9654106938052507;568.2428501013395	0.9654106938052507;568.2428501013397	1179.04	-667.743	1341.49
CL2	Bottleneck	0.7097999839382633;1530.5206819016298	0.7097999839382633;1530.5206819016296	1603.64	-667.743	1341.49
CL2	Bottleneck	0.5688087853627456;1931.7439022228596	0.5688087853627456;1931.7439022228598	2001.13	-667.743	1341.49
CL2	Bottleneck	0.1304919448630272;1891.4204079328135	0.1304919448630272;1891.420407932813	8722.85	-667.743	1341.49
CL2	Bottleneck	0.47726113211340326;154.88102617802912	0.47726113211340326;154.88102617802912	2384.99	-667.743	1341.49
CL2	Bottleneck	0.6165506619385787;596.7076675204132	0.6165506619385787;596.7076675204131	1846.18	-667.743	1341.49
CL2	Bottleneck	0.9227861376871528;1881.7286392212118	0.9227861376871528;1881.7286392212125	1233.51	-667.743	1341.49
CL2	Bottleneck	0.7031882108288462;386.0318219504004	0.7031882108288462;386.0318219504004	1618.72	-667.743	1341.49
CL2	Bottleneck	0.5743593366085824;1145.5982330354843	0.5743593366085824;1145.5982330354843	1981.79	-667.743	1341.49
CL2	Bottleneck	0.9786836707797324;798.5260321243073	0.9786836707797324;798.5260321243076	1163.05	-667.743	1341.49
CL2	Bottleneck	0.7393593045441124;610.2375070649972	0.7393593045441124;610.2375070649973	1539.52	-667.743	1341.49
CL2	Bottleneck	0.20683284720741302;1308.3825389010467	0.206832847207413;1308.3825389010465	5503.29	-667.743	1341.49
CL2	Bottleneck	0.9898339082822004;1360.3086016079537	0.9898339082822004;1360.3086016079542	1149.95	-667.743	1341.49
CL2	Bottleneck	0.5103014359066539;465.80008557693753	0.5103014359066539;465.8000855769375	2230.57	-667.743	1341.49
CL2	Bottleneck	0.5385123261841901;165.72692029578917	0.5385123261841901;165.7269202957892	2113.72	-667.743	1341.49
CL2	Bottleneck	0.9998242251903291;882.3425984116388	0.9998242251903291;882.3425984116388	1138.46	-667.743	1341.49
CL2	Bottleneck	0.7178961558945469;956.4868274657146	0.7178961558945469;956.4868274657148	1585.55	-667.743	1341.49
CL2	Bottleneck	0.025853806573277446;281.5563218094859	0.025853806573277446;281.5563218094859	44026.9	-667.743	1341.49
CL2	Bottleneck	0.3111420995208299;139.8136272739081	0.3111420995208299;139.81362727390805	3658.33	-667.743	1341.49
CL2	Bottleneck	0.9829694259623946;954.7258193233428	0.9829694259623946;954.7258193233428	1157.98	-667.743	1341.49
CL2	Bottleneck	0.09348097748043567;107.2886692262649	0.09348097748043567;107.28866922626486	12176.4	-667.743	1341.49
CL2	Bottleneck	0.6781608784367037;1490.243107045203	0.6781608784367037;1490.2431070452024	1678.45	-667.743	1341.49
CL2	Bottleneck	0.28719433951591056;1378.9215731569366	0.2871943395159105;1378.9215731569368	3963.39	-667.743	1341.49
CL2	Bottleneck	0.9186013536299237;121.25289911148074	0.9186013536299237;121.2528991114807	1239.13	-667.743	1341.49
CL2	Bottleneck	0.9250937261647426;643.0003911390098	0.9250937261647426;643.00039113901	1230.43	-667.743	1341.49
CL2	Bottleneck	0.5161704071921287;1106.190464936981	0.5161704071921287;1106.1904649369812	2205.21	-667.743	1341.49
CL2	Bottleneck	0.9900137229379944;823.5308579888539	0.9900137229379944;823.5308579888541	1149.74	-667.743	1341.49
CL2	Bottleneck	0.7125568156520535;870.2850017892907	0.7125568156520535;870.285001789291	1597.43	-667.743	1341.49
CL2	Bottleneck_expansion	0.5923513879533903;1673.9308066376063;36.08960794236948;399.5915053814688	0.2754427296433591;1.373889276184379;36.08960793624563;0.24670115073005744	1977.22	-146.708	303.417
CL2	Bottleneck_expansion	0.5982252688813484;430.70543414044295;3.392692344471382;281.213096044046	0.6603584463663039;343.3508590628242;3.3872533524580493;160.97739097612182	6.75729	-198.225	406.45
CL2	Bottleneck_expansion	0.4365029444572315;124.75011937552256;42.49470300803654;311.7914256485304	0.5095614036712979;90.53655876303593;42.494703008036545;41.8626065274714	25.7168	-197.797	405.594
CL2	Bottleneck_expansion	0.7794921304380446;710.7492929990316;94.83856371151744;141.80542544232395	0.7889885079328217;345.9698730496082;94.83856371151744;287.92288247566285	5.0493	-295.052	600.105
CL2	Bottleneck_expansion	0.41321656186734573;1360.1834948820695;41.48419480798856;97.98345940966918	0.03143952562594686;882.9117799732234;41.484194807988565;421.845410417362	2.6065	-198.374	406.747
CL2	Bottleneck_expansion	0.11441175036499665;118.2155324326717;1.1722590561654367;306.3626859949115	0.08147252504661964;1.2246246362825168;1.17694421414227;0.5352879389375627	1834.86	-194.106	398.213
CL2	Bottleneck_expansion	0.10426410845261652;521.9952132959519;52.44846163093333;250.5010345675777	0.10426521335440109;522.6120131695875;52.448461630933316;249.99935685943635	4.39991	-198.355	406.709
CL2	Bottleneck_expansion	0.5537209288767164;1651.4368761413941;57.05562290138448;24.49179228521564	0.7944276764323572;1160.1364884486622;57.05562290138451;24.321734571721144	20.9301	-2633.27	5276.53
CL2	Bottleneck_expansion	0.12829397037175735;19.64716248593129;14.62718152494743;420.45477653374905	0.12829397037175733;19.647162485931286;14.62718152494743;420.45477653374917	57.9352	-667.743	1345.49
CL2	Bottleneck_expansion	0.8471149018295677;1980.7150611095255;28.054932689634438;66.38476804146754	0.8471149018295677;1980.715061109526;28.05493268963444;66.38476804146754	8.03746	-2794.21	5598.42
CL2	Bottleneck_expansion	0.5401746817372471;920.5881349891437;96.12539602663314;269.12203434152786	0.9981735078736912;299.8923269770337;96.12539602663315;135.63175628605572	7.87551	-198.789	407.578
CL2	Bottleneck_expansion	0.5792777209891227;716.1074202924203;20.714589000979423;258.51638471084345	0.8891605326924389;230.99243233569206;20.71458900097942;108.65462962949812	10.0066	-197.929	405.857
CL2	Bottleneck_expansion	0.3202122115277029;670.0092406312123;41.008348474597426;167.8087837403712	0.8019964637832666;239.8312112436725;41.008348474597426;113.94435122036846	9.59185	-197.989	405.978
CL2	Bottleneck_expansion	0.8690106485103102;1715.9764412758896;42.4516667724922;18.903919715699878	0.8690106485103102;1715.9764412758893;42.4516667724922;18.903919715699878	25.93	-2731.59	5473.17
CL2	Bottleneck_expansion	0.4171068574965674;1439.2734111929742;13.397032156787269;399.5751229020302	0.07268164736242792;1.3780356477140454;13.397032286066475;0.6233142193600523	1627.07	-195.417	400.833
CL2	Bottleneck_expansion	0.8439863816765015;543.8624686372684;45.92330869109858;18.757733224876006	0.8439863816765015;543.8624686372682;45.923308691098576;18.757733224876002	28.1322	-2055.45	4120.89
CL2	Bottleneck_expansion	0.03807745570644994;844.6232995352258;30.542376658357295;374.4863652608498	0.03828935436094574;585.5015533017871;30.542376658357295;280.1751264280772	3.92716	-198.37	406.74
CL2	Bottleneck_expansion	0.7864193679565729;887.3670959839633;42.95357686912817;462.99473481398184	0.9495164254953417;443.91041998422276;42.95357686912816;206.4722733079839	5.24771	-198.301	406.602
CL2	Bottleneck_expansion	0.6771613392941108;383.46708461439715;69.59000231488857;9.42867581310508	0.6771613392941108;383.46708461439727;69.59000231488855;9.42867581310508	53.7107	-1957	3924.01
CL2	Bottleneck_expansion	0.09195020672008086;834.4087697715798;81.35539362703689;337.1788600405553	0.095905578485016;382.1506665846267;81.35539362703688;183.83350380175318	5.99888	-198.366	406.732
CL2	Bottleneck_expansion	0.30819047738650485;1080.3954802046821;44.892011747765395;427.47823585259755	0.07429533351692304;1.8407851297335718;44.892011754740764;0.841336554935946	1227.32	-195.392	400.784
CL2	Bottleneck_expansion	0.618419674944203;341.3038154464751;15.388158234774341;443.3095361902077	0.7551752624981541;221.27560364844547;15.388158224660728;104.53970865722835	10.4265	-197.974	405.949
CL2	Bottleneck_expansion	0.7004741090067856;1618.3491818353339;79.37474333023056;485.9131661524069	0.7005297788215876;1576.2736245217131;79.37474333023057;498.79010403144116	1.84001	-275.349	560.698
CL2	Bottleneck_expansion	0.4146398845263937;273.3128132572075;36.24390286272845;395.984357532199	0.9993807104450995;40.67783048979373;36.2439028268584;19.47515764632486	55.1331	-197.442	404.885
CL2	Bottleneck_expansion	0.16270395196262616;104.43429211572892;18.353605279510475;459.5571169411023	0.18276250383993553;288.51871143000494;18.353605279510475;136.97757504346208	7.99849	-198.315	406.629
CL2	Bottleneck_expansion	0.8804907385523927;1624.350053316288;30.522602010034248;362.57857193584806	0.554932001456146;1417.3384484217106;30.52260201666357;492.7529208892296	1.93678	-243.054	496.108
CL2	Bottleneck_expansion	0.13377768847674523;369.4505564842975;25.958100782631767;98.94378992801833	0.08542998499224262;1.4070654071733166;25.958100791779515;0.621608402618477	1598.53	-194.372	398.745
CL2	Bottleneck_expansion	0.8429150906796629;207.4919948919555;99.21012731230174;241.44562156363318	0.8302698067756538;233.82313071765876;99.21012731230174;109.64404476127723	9.90496	-197.984	405.969
CL2	Bottleneck_expansion	0.02074966817509325;1145.2735154079107;6.609585796620021;477.110616084656	0.02078721316847908;761.255286477967;6.609585796620021;363.26133379158097	3.0251	-198.376	406.752
CL2	Bottleneck_expansion	0.12187140923668453;1260.9342684579697;99.0552039417362;160.79739724446156	0.1346476411907908;1.4681489945625046;99.055203726792;0.5951644825231521	1543.03	-190.879	391.757
CL2	Bottleneck_expansion	0.21522250498037965;1049.8761911536108;78.78760671591955;366.55723343222974	0.49585763875226363;10.25883266057016;78.78760671591952;4.597663753098954	220.545	-194.546	399.093
CL2	Bottleneck_expansion	0.6433867610394289;1089.4748676291383;16.10691938646346;354.98936775646706	0.992932022872147;177.58083349529934;16.106919348200197;82.56564606815142	13.0733	-197.748	405.496
CL2	Bottleneck_expansion	0.13865160657956263;1188.7971427157051;25.209545683688795;112.38350149119447	0.010131721813546369;675.6462944215767;25.209545683688795;320.2326658848279	3.42081	-198.408	406.815
CL2	Bottleneck_expansion	0.19980164458831515;860.6241976502488;22.315667077521706;244.31416307329445	0.07810398595847602;1.2304481926189623;22.31566707752171;0.5426596809395979	1824.23	-194.493	398.986
CL2	Bottleneck_expansion	0.7523187693988165;1488.0696861916983;4.39200722970522;417.5542067428882	0.8812337419653483;24.81650005791676;4.39826543521554;11.624660412061981	90.372	-196.628	403.255
CL2	Bottleneck_expansion	0.6426482437022714;1657.0639150701331;55.18575576529169;27.486038879123043	0.6426482437022714;1657.0639150701327;55.1857557652917;27.486038879123043	18.3391	-3033.54	6077.08
CL2	Bottleneck_expansion	0.8745805926021445;530.5212391271968;14.403321179176487;444.07986599611945	0.9992352165605503;414.80108410113644;14.40332062533164;190.37947709712085	5.6546	-198.538	407.076
CL2	Bottleneck_expansion	0.6542199416173164;575.0217050045691;87.78206316158351;439.049628321306	0.8163655777580328;367.30381741782304;87.78206316158354;174.0916759231028	6.27816	-198.118	406.236
CL2	Bottleneck_expansion	0.6963846949751266;363.2497620145287;62.91499756016352;74.29275947214303	0.7108358198284785;176.11478244866967;62.91499756016352;150.2017248323756	9.80155	-302.971	615.943
CL2	Bottleneck_expansion	0.15105569235992275;48.120052279132416;13.741224704637546;108.4942421129248	0.15615674296733398;1.7639654826446727;13.741224546273456;0.7068815914276443	1295.59	-189.585	389.169
CL2	Bottleneck_expansion	0.36989475748159534;1067.221328742868;48.52559965852523;6.53498622345966	0.36989475748159534;1067.221328742868;48.52559965852524;6.534986223459659	73.415	-2791.18	5592.36
CL2	Bottleneck_expansion	0.8167350813602031;1458.3924247642353;74.32946184477235;462.63337183576584	0.9944932023865185;172.14655573711346;74.32946184477234;83.07115219727152	13.2209	-197.975	405.949
CL2	Bottleneck_expansion	0.18533122205991232;466.1498208285795;95.61235067731553;272.63490936887763	0.06649515748089103;1.193659412219628;95.61235060617597;0.5354099427923178	1880.3	-195.056	400.112
CL2	Bottleneck_expansion	0.7563105643230036;330.0021772643945;70.17325158523033;231.58602842037828	0.8665635038486695;267.4141555161094;70.1732515852303;123.97501333736486	8.71638	-198.162	406.324
CL2	Bottleneck_expansion	0.7797099336576336;330.54229279270265;55.331165618172626;70.21542322459796	0.798038636221736;160.04566507584238;55.33116561817264;141.7534007603107	10.6016	-314.796	639.592
CL2	Bottleneck_expansion	0.5095502343624383;1527.5377591173922;88.18411425772986;19.373213096007092	0.5095502343624383;1527.537759117392;88.18411425772985;19.373213096007095	25.6577	-3113.26	6236.52
CL2	Bottleneck_expansion	0.8460743326342122;1530.0842495901197;89.11523361802817;139.63722181731902	0.26452186183287335;1132.7982313424318;89.11523361802814;499.07272513883987	2.1219	-201.071	412.142
CL2	Bottleneck_expansion	0.7370777378737319;1843.1799779382745;51.15989023130795;322.8521492495777	0.5859131592322844;1329.5752366431434;51.15989023130794;490.27350833843934	1.99584	-227.439	464.877
CL2	Bottleneck_expansion	0.2757417440719543;644.8203746945894;77.88713599099657;413.24211269748616	0.08427615896376402;1.3334331938400736;77.88713598653058;0.5818586416387992	1692.39	-193.686	397.372
CL2	Bottleneck_expansion	0.48315439351587997;583.2403338191709;1.2626470123427547;267.1948831680238	0.4832332815836664;568.7840982647182;1.2626050584716;273.8065764448461	4.02626	-198.305	406.61
CL1	Constant	-	-	188.093	-208.332	418.663
CL1	Constant	-	-	188.093	-208.332	418.663
CL1	Constant	-	-	188.093	-208.332	418.663
CL1	Constant	-	-	188.093	-208.332	418.663
CL1	Constant	-	-	188.093	-208.332	418.663
CL1	Constant	-	-	188.093	-208.332	418.663
CL1	Constant	-	-	188.093	-208.332	418.663
CL1	Constant	-	-	188.093	-208.332	418.663
CL1	Constant	-	-	188.093	-208.332	418.663
CL1	Constant	-	-	188.093	-208.332	418.663
CL1	Constant	-	-	188.093	-208.332	418.663
CL1	Constant	-	-	188.093	-208.332	418.663
CL1	Constant	-	-	188.093	-208.332	418.663
CL1	Constant	-	-	188.093	-208.332	418.663
CL1	Constant	-	-	188.093	-208.332	418.663
CL1	Constant	-	-	188.093	-208.332	418.663
CL1	Constant	-	-	188.093	-208.332	418.663
CL1	Constant	-	-	188.093	-208.332	418.663
CL1	Constant	-	-	188.093	-208.332	418.663
CL1	Constant	-	-	188.093	-208.332	418.663
CL1	Constant	-	-	188.093	-208.332	418.663
CL1	Constant	-	-	188.093	-208.332	418.663
CL1	Constant	-	-	188.093	-208.332	418.663
CL1	Constant	-	-	188.093	-208.332	418.663
CL1	Constant	-	-	188.093	-208.332	418.663
CL1	Constant	-	-	188.093	-208.332	418.663
CL1	Constant	-	-	188.093	-208.332	418.663
CL1	Constant	-	-	188.093	-208.332	418.663
CL1	Constant	-	-	188.093	-208.332	418.663
CL1	Constant	-	-	188.093	-208.332	418.663
CL1	Constant	-	-	188.093	-208.332	418.663
CL1	Constant	-	-	188.093	-208.332	418.663
CL1	Constant	-	-	188.093	-208.332	418.663
CL1	Constant	-	-	188.093	-208.332	418.663
CL1	Constant	-	-	188.093	-208.332	418.663
CL1	Constant	-	-	188.093	-208.332	418.663
CL1	Constant	-	-	188.093	-208.332	418.663
CL1	Constant	-	-	188.093	-208.332	418.663
CL1	Constant	-	-	188.093	-208.332	418.663
CL1	Constant	-	-	188.093	-208.332	418.663
CL1	Constant	-	-	188.093	-208.332	418.663
CL1	Constant	-	-	188.093	-208.332	418.663
CL1	Constant	-	-	188.093	-208.332	418.663
CL1	Constant	-	-	188.093	-208.332	418.663
CL1	Constant	-	-	188.093	-208.332	418.663
CL1	Constant	-	-	188.093	-208.332	418.663
CL1	Constant	-	-	188.093	-208.332	418.663
CL1	Constant	-	-	188.093	-208.332	418.663
CL1	Constant	-	-	188.093	-208.332	418.663
CL1	Constant	-	-	188.093	-208.332	418.663
CL1	Expansion	435.15901478936905;86.96876161120004	644.9212680514137;629.6504062325251	0.373277	-280.014	566.027
CL1	Expansion	161.17913685001548;194.56146000698027	39.96621302815523;779.3722144745653	4.70631	-208.332	422.663
CL1	Expansion	381.5474360632557;210.848372300519	118.50654870644205;1997.1221732081813	1.5872	-208.332	422.663
CL1	Expansion	991.8697878531782;1593.0994991747007	838.8462162688728;1940.1011157030869	0.237901	-217.522	441.045
CL1	Expansion	80.06952813014153;1481.9331591561804	78.97145008629553;1502.1570115691104	2.38179	-208.332	422.663
CL1	Expansion	154.3379587380454;632.6720446385525	71.60284179601638;1352.6125182569012	2.6269	-208.332	422.663
CL1	Expansion	70.87701114805087;1591.8903654981586	70.87701114805088;1591.8903654981582	2.6538	-208.332	422.663
CL1	Expansion	104.54862252995183;1715.8233436169767	97.56737320826858;1836.6203801642373	1.92783	-208.332	422.663
CL1	Expansion	578.0464088989796;1120.8639696807684	309.0257226573811;1986.851934602528	0.60924	-208.451	422.901
CL1	Expansion	288.4851378866213;599.8343518942613	91.13297949666826;1719.3654146395477	2.06394	-208.332	422.663
CL1	Expansion	479.26035276725;792.3109838841882	180.29206570206466;1994.146058780538	1.04328	-208.333	422.666
CL1	Expansion	525.9001263548734;1861.3662052883244	489.7923282194616;1996.700261109673	0.387857	-209.624	425.249
CL1	Expansion	359.69070450128555;1890.3681027904559	342.08482438762;1986.106053839396	0.550812	-208.554	423.108
CL1	Expansion	800.0871969487888;561.3312110049828	215.52219049054256;1996.2296142379719	0.872782	-208.339	422.677
CL1	Expansion	405.6264335753222;1256.5504259439751	259.8483081640987;1946.1562813182015	0.724095	-208.373	422.746
CL1	Expansion	575.3210747095193;1930.0059032991742	563.3702053846539;1970.8011422817951	0.339852	-210.711	427.421
CL1	Expansion	967.2497630150189;1031.238019065098	508.3047998141825;1993.1447392912055	0.374359	-209.852	425.704
CL1	Expansion	32.333279284307444;1778.1036455728479	32.333279284307444;1778.1036455728474	5.81733	-208.332	422.663
CL1	Expansion	530.393898961304;162.6667343023276	707.5878453641022;1969.5643493861103	0.275728	-213.577	433.154
CL1	Expansion	162.08051444971483;828.8423210744751	79.19223450728768;1689.461020487898	2.37515	-208.332	422.663
CL1	Expansion	739.0918608283486;1308.013879220063	489.47009443072795;1984.3182326932322	0.388201	-209.655	425.31
CL1	Expansion	450.3337166104458;879.9523440816066	195.53643464263956;1987.639536832725	0.961957	-208.335	422.669
CL1	Expansion	532.4481027237011;1093.9829256798398	292.6088272483984;1986.2707360755307	0.643239	-208.415	422.829
CL1	Expansion	989.8883349087438;621.9770639516753	266.2825778478205;1995.8460711790349	0.706597	-208.373	422.745
CL1	Expansion	416.9974147696001;1428.043997730167	297.22226179364196;1981.6276912581743	0.633308	-208.425	422.851
CL1	Expansion	280.62655635488755;401.0594680999069	72.52654303014275;1388.5357795551272	2.59344	-208.332	422.663
CL1	Expansion	817.8136883875419;1760.9986412986843	718.7452848069187;1993.2804216651307	0.271551	-213.639	433.278
CL1	Expansion	853.1534362278975;883.9883179123997	339.6785750615432;1994.9189749706977	0.554651	-208.539	423.079
CL1	Expansion	693.9358220916855;1634.966570663522	565.933324929266;1991.2454383795755	0.338191	-210.659	427.319
CL1	Expansion	195.7802857322823;1921.3271997168679	188.6151528495003;1993.600702717061	0.997249	-208.334	422.667
CL1	Expansion	378.0953625983497;388.1398379405998	87.72901875336754;1667.5758673808655	2.14403	-208.332	422.663
CL1	Expansion	57.875104891068865;1336.333571345657	57.875104891068865;1336.3335713456574	3.24999	-208.332	422.663
CL1	Expansion	860.4228141394576;427.38460181706796	282.15405171659376;1983.0872508401906	0.666979	-208.397	422.794
CL1	Expansion	772.3717766435217;1750.5205478907758	679.7281760174682;1988.1114063803168	0.285628	-212.797	431.593
CL1	Expansion	597.9419596906512;193.84437472211613	771.3218879516826;1939.117661180887	0.255888	-215.525	437.049
CL1	Expansion	365.4413620583292;1362.5642122707932	249.83536010256478;1987.1707271635175	0.753024	-208.358	422.715
CL1	Expansion	578.516902421683;1673.8034067003496	485.7633186862065;1992.514122523967	0.390977	-209.591	425.182
CL1	Expansion	15.372950335424092;908.3349092275879	15.372950335424093;908.3349092275878	12.2353	-208.332	422.663
CL1	Expansion	863.172745139961;1385.6607447751398	603.5823853894327;1979.0633709723033	0.318607	-211.347	428.694
CL1	Expansion	91.4554780719966;163.10371462865314	27.026586440972086;513.1134646311393	6.95957	-208.332	422.663
CL1	Expansion	879.3089675709629;1959.5098079773927	879.308967570963;1959.509807977392	0.228176	-218.547	443.093
CL1	Expansion	555.1193822562645;1713.4897421702733	478.330404702298;1986.210254505052	0.396863	-209.527	425.053
CL1	Expansion	499.9142521967714;466.2136560244965	97.05665629805816;1893.3468197159077	1.93798	-208.332	422.663
CL1	Expansion	186.07509027382267;1131.6421139839379	105.46650745237066;1982.5896397302984	1.78344	-208.332	422.663
CL1	Expansion	318.6002165112589;106.58979850034301	567.4320527843776;1829.500041415943	0.339331	-211.532	429.065
CL1	Expansion	493.31873112953696;1270.9167491619053	308.63808142714737;1992.1200892299494	0.609991	-208.448	422.895
CL1	Expansion	276.12604515432497;1235.6746556880291	167.16219159944671;1996.7385872448988	1.12522	-208.332	422.664
CL1	Expansion	342.70956688216324;1887.0029168587594	326.7281728801125;1979.2815252338892	0.576475	-208.504	423.008
CL1	Expansion	752.6459073194602;33.49929097488502	7.216130074206435;241.70399843042347	26.0657	-208.332	422.663
CL1	Expansion	946.6706786940302;259.55828133071026	792.5452238990399;1896.0272018975556	0.250633	-216.665	439.329
CL1	Bottleneck	0.3210815461599726;1815.856950134226	0.32108154615997264;1815.8569501342254	585.812	-208.332	422.663
CL1	Bottleneck	0.9432190280978537;932.4108746150304	0.9432190280978537;932.4108746150304	199.416	-208.332	422.663
CL1	Bottleneck	0.24089383312810234;525.1347905341461	0.24089383312810234;525.1347905341463	780.814	-208.332	422.663
CL1	Bottleneck	0.4536936229621515;679.1707388641474	0.4536936229621515;679.1707388641476	414.582	-208.332	422.663
CL1	Bottleneck	0.7918519660714565;1236.5037917117975	0.7918519660714565;1236.5037917117975	237.536	-208.332	422.663
CL1	Bottleneck	0.1799097027167638;1191.888278822401	0.17990970271676376;1191.8882788224007	1045.49	-208.332	422.663
CL1	Bottleneck	0.08926855260152478;1168.9504775538376	0.08926855260152479;1168.950477553838	2107.05	-208.332	422.663
CL1	Bottleneck	0.15506892155788776;590.9218662804949	0.15506892155788776;590.9218662804947	1212.97	-208.332	422.663
CL1	Bottleneck	0.6115360892959139;1626.6519223068249	0.6115360892959139;1626.651922306825	307.575	-208.332	422.663
CL1	Bottleneck	0.01997352476632679;1966.3134027462809	0.01997352476632679;1966.3134027462804	9417.13	-208.332	422.663
CL1	Bottleneck	0.1042247436606036;1229.608445363085	0.10422474366060361;1229.6084453630851	1804.69	-208.332	422.663
CL1	Bottleneck	0.34518095646242314;856.8690015533901	0.34518095646242314;856.86900155339	544.912	-208.332	422.663
CL1	Bottleneck	0.8453387054591949;1337.6477892726716	0.8453387054591949;1337.6477892726718	222.507	-208.332	422.663
CL1	Bottleneck	0.872521758553316;910.388213750001	0.872521758553316;910.3882137500013	215.574	-208.332	422.663
CL1	Bottleneck	0.018971843725133743;1858.5769519379885	0.018971843725133743;1858.5769519379883	9914.34	-208.332	422.663
CL1	Bottleneck	0.91614652798879;1447.520514636296	0.91614652798879;1447.5205146362962	205.309	-208.332	422.663
CL1	Bottleneck	0.0027613072977120193;917.4241823584126	0.0027613072977120184;917.4241823584131	68117.5	-208.332	422.663
CL1	Bottleneck	0.05904164496733322;1537.9330940383272	0.05904164496733322;1537.9330940383265	3185.77	-208.332	422.663
CL1	Bottleneck	0.0218296927729655;1391.1868252184508	0.021829692772965502;1391.1868252184506	8616.4	-208.332	422.663
CL1	Bottleneck	0.8735295387369868;1445.7656295650092	0.8735295387369868;1445.7656295650095	215.326	-208.332	422.663
CL1	Bottleneck	0.7036022547038404;1381.540241793578	0.7036022547038404;1381.5402417935773	267.329	-208.332	422.663
CL1	Bottleneck	0.8560443734543681;185.83972015904004	0.8560443734543681;185.83972015904013	219.724	-208.332	422.663
CL1	Bottleneck	0.6396492745289442;13.294000610790002	0.6396492745289442;13.294000610790002	294.057	-208.332	422.663
CL1	Bottleneck	0.042965833920394284;5.674100282570871	0.04296583392039429;5.674100282570871	4377.74	-208.332	422.663
CL1	Bottleneck	0.9388564443944705;833.5296044114158	0.9388564443944705;833.529604411416	200.343	-208.332	422.663
CL1	Bottleneck	0.09683115262172191;1541.858483872188	0.09683115262172191;1541.8584838721874	1942.49	-208.332	422.663
CL1	Bottleneck	0.25776557582068216;772.4686013032085	0.25776557582068216;772.4686013032083	729.707	-208.332	422.663
CL1	Bottleneck	0.2701646700170357;1525.250929808847	0.2701646700170357;1525.2509298088464	696.218	-208.332	422.663
CL1	Bottleneck	0.4560994584844759;473.20018104002816	0.4560994584844759;473.200181040028	412.396	-208.332	422.663
CL1	Bottleneck	0.41163612649166503;1611.6488505301443	0.41163612649166503;1611.6488505301438	456.941	-208.332	422.663
CL1	Bottleneck	0.8607097053778934;1172.652058855535	0.8607097053778934;1172.6520588555352	218.533	-208.332	422.663
CL1	Bottleneck	0.608661371344081;75.93660188224005	0.608661371344081;75.93660188224003	309.028	-208.332	422.663
CL1	Bottleneck	0.49100662353944463;84.97151502459643	0.49100662353944463;84.97151502459647	383.077	-208.332	422.663
CL1	Bottleneck	0.40478690410831797;1233.3118067325124	0.40478690410831797;1233.3118067325127	464.673	-208.332	422.663
CL1	Bottleneck	0.3650803077975797;1912.3406416392536	0.3650803077975797;1912.3406416392531	515.211	-208.332	422.663
CL1	Bottleneck	0.8838622334731012;731.9819875381968	0.8838622334731012;731.9819875381968	212.808	-208.332	422.663
CL1	Bottleneck	0.47669578122043266;517.7916748527616	0.47669578122043266;517.7916748527614	394.577	-208.332	422.663
CL1	Bottleneck	0.9854348551374631;845.7520286780232	0.9854348551374631;845.752028678023	190.873	-208.332	422.663
CL1	Bottleneck	0.24810685935334986;1137.623942623694	0.24810685935334986;1137.623942623694	758.114	-208.332	422.663
CL1	Bottleneck	0.23927644048269414;65.07725418484367	0.2392764404826941;65.07725418484364	786.092	-208.332	422.663
CL1	Bottleneck	0.12114484741505763;887.1788679157199	0.12114484741505761;887.1788679157199	1552.63	-208.332	422.663
CL1	Bottleneck	0.6572930891766162;1370.185024507246	0.6572930891766162;1370.1850245072465	286.164	-208.332	422.663
CL1	Bottleneck	0.9283966657104075;1898.972131808519	0.9283966657104075;1898.9721318085187	202.6	-208.332	422.663
CL1	Bottleneck	0.19327916524368002;868.0409159331273	0.19327916524368002;868.0409159331275	973.169	-208.332	422.663
CL1	Bottleneck	0.9845362611783813;786.1999148310443	0.9845362611783813;786.1999148310443	191.048	-208.332	422.663
CL1	Bottleneck	0.5095726608619408;256.17937099838394	0.5095726608619408;256.1793709983839	369.12	-208.332	422.663
CL1	Bottleneck	0.2213140519155531;1987.3396945375157	0.22131405191555306;1987.339694537516	849.894	-208.332	422.663
CL1	Bottleneck	0.39110188484707986;239.10431602822047	0.39110188484707986;239.10431602822052	480.932	-208.332	422.663
CL1	Bottleneck	0.9013922742399061;1.227549640097081	0.2462493062406457;0.5356789560760953	635.456	-197.974	401.947
CL1	Bottleneck	0.707340532748015;1890.6032497777007	0.707340532748015;1890.6032497777005	265.916	-208.332	422.663
CL1	Bottleneck_expansion	0.41622705328591736;1577.2799637713745;0.6020398781070635;449.96573186686874	0.4163141615833128;1442.4188705029042;0.6019872834417856;491.93213142618487	0.232404	-640.027	1290.05
CL1	Bottleneck_expansion	0.6453975136030677;1918.2458449223516;20.028715436194588;493.40580831460005	0.6453975136030677;1918.2458449223518;20.028715436194588;493.40580831459994	0.193692	-846.296	1702.59
CL1	Bottleneck_expansion	0.38648076588848795;1673.187870178822;84.72434187720978;389.24277520376273	0.3866751975799834;1399.3452682934553;84.72434187720975;465.24798199339614	0.241741	-656.471	1322.94
CL1	Bottleneck_expansion	0.5323546961215201;1514.2630235569802;5.190308999666415;391.05200265113666	0.5326550776304444;1266.345754120209;5.190307334234207;467.3786700391098	0.257515	-592.954	1195.91
CL1	Bottleneck_expansion	0.7436183063134169;155.17073483947252;15.51369493133813;157.91372841006913	0.6170687047615605;53.69048811999006;15.513695059481787;498.18492676651005	3.50348	-208.339	426.677
CL1	Bottleneck_expansion	0.2383297454099106;538.8877459563411;20.907210397296716;346.5800952810939	0.23185356220504874;336.5908249429579;20.907210397296712;497.4897083722788	0.64403	-237.554	485.109
CL1	Bottleneck_expansion	0.11787211414801424;1239.2289981901358;37.438700548489464;395.00709250094576	0.09509921347186308;1.000001513135968;37.438700548489464;6.804302801696012	188.204	-208.406	426.812
CL1	Bottleneck_expansion	0.23136050319817883;1904.5503262046695;30.51129943694175;377.90438816137953	0.15014624539229393;1587.2378812146042;30.51129943694175;498.56925262656875	0.217521	-694.853	1399.71
CL1	Bottleneck_expansion	0.831619030488246;1223.0434995663124;69.79600093586531;346.1924616018112	0.8330488577222023;855.0587748948769;69.79600093586534;494.3489829336955	0.328903	-397.084	804.167
CL1	Bottleneck_expansion	0.5351327941227533;535.6159910857499;85.89186104319727;315.33860866098684	0.4742025396381356;318.9421539985389;85.89186104319728;499.26514947104073	0.671042	-233.81	477.62
CL1	Bottleneck_expansion	0.8401440446000596;1836.3102865587823;1.6520211803340956;225.7045960913564	0.868707991280036;883.2479012029415;1.6479098521230586;452.331643995654	0.330906	-439.147	888.294
CL1	Bottleneck_expansion	0.05169073507651582;1053.6028984120583;11.444993475910149;318.79764010525554	0.02851155056826595;8.290725051824744;11.444993475910147;156.1738577713753	22.6872	-208.332	426.663
CL1	Bottleneck_expansion	0.8272193693234585;576.3168811703937;59.45534002919458;128.66795094187285	0.40504010661816153;361.3533051903319;59.455340030524795;369.5558180356091	0.657849	-273.634	557.268
CL1	Bottleneck_expansion	0.6402323782373458;615.9555520738523;50.021804531060354;187.73314915688889	0.36862150751699185;297.97480070480464;50.02180453106035;477.64190354384294	0.714655	-232.406	474.812
CL1	Bottleneck_expansion	0.5428535289635334;267.9820638644949;45.20831357003705;180.41134838153704	0.45625191310782753;105.54496839892953;45.208313570037056;496.9110385884773	1.79152	-209.005	428.011
CL1	Bottleneck_expansion	0.37317295796780114;770.6820443995966;0.2696253122160486;482.73533331116613	0.37317295796780114;770.6820443995964;0.2696253122160486;482.735333311166	0.355941	-372.907	755.814
CL1	Bottleneck_expansion	0.20858250841232379;1839.9495960982529;87.1388951139003;8.197753380434825	0.20858250841232379;1839.9495960982522;87.13889511390026;8.197753380434825	2.98802	-3226.45	6462.9
CL1	Bottleneck_expansion	0.7825387313284314;1774.3382024034936;11.99541583130872;323.5004496357506	0.7858238773464503;1239.2811556479828;11.995415773770617;461.4862909297649	0.262289	-587.44	1184.88
CL1	Bottleneck_expansion	0.4645866084654189;1176.6247889503961;35.80249523473697;487.6215167943313	0.4645866084654189;1176.6247889503961;35.80249523473697;487.62151679433134	0.266413	-531.528	1073.06
CL1	Bottleneck_expansion	0.8195333243609993;69.42266702224303;36.9077369933871;59.318606265897024	0.1728158091698631;31.07120124609874;36.9077369933871;497.8143611486623	6.05362	-208.332	426.663
CL1	Bottleneck_expansion	0.6867129603997305;1368.2414521914582;32.17280545751762;223.68455462308344	0.6963474905477531;665.7358134779562;32.17280545751762;453.9614345685986	0.401449	-349.988	709.977
CL1	Bottleneck_expansion	0.7716044638020904;387.252012158953;88.0458808056073;245.15012237483168	0.6769043575959418;227.1321684125653;88.04588080560731;497.1996957640708	0.885609	-219.045	448.09
CL1	Bottleneck_expansion	0.35183773358923925;1375.5087701279701;52.238773355824144;25.75780135654393	0.35183773358923925;1375.5087701279704;52.23877335582414;25.757801356543926	1.16756	-3043.72	6097.44
CL1	Bottleneck_expansion	0.5973536918787997;591.5966310810581;64.05933707586637;11.962877980358888	0.5973536918787997;591.5966310810584;64.05933707586637;11.962877980358888	2.54943	-2436.16	4882.32
CL1	Bottleneck_expansion	0.6630720812554481;1224.3799828578328;55.1963063127764;229.12733869344643	0.6692215717631682;597.0070928630931;55.19630631277642;466.0482914010017	0.429916	-318.991	647.983
CL1	Bottleneck_expansion	0.7506839105403927;1782.2996608901844;90.13470396912567;78.39811890983967	0.7506839105403927;1782.2996608901842;90.13470396912567;78.39811890983968	0.495912	-2616.33	5242.65
CL1	Bottleneck_expansion	0.19481363968124704;215.84514924326254;58.16974254157464;270.2504736136765	0.18901430866404817;74.96200317640104;58.16974254157462;498.60859410309945	2.51108	-208.427	426.854
CL1	Bottleneck_expansion	0.4197407008543478;667.4182033670367;86.78250216132301;78.13619247398285	0.05765447241359974;682.7393205811035;86.78250216088867;496.35132241115247	0.384115	-334.861	679.722
CL1	Bottleneck_expansion	0.22853870444047897;1768.5407130509598;53.11397174102218;220.36939063053885	0.23157461365978432;861.1963257692125;53.1139717410222;447.6041251138769	0.337908	-434.269	878.538
CL1	Bottleneck_expansion	0.06401959259785334;298.4195973622201;65.51127469078877;4.982112158564977	0.9433907854233847;28.671879400358705;65.51127469115924;3.551250563180812	16.6774	-922.581	1855.16
CL1	Bottleneck_expansion	0.6030126232818238;561.978298381456;79.52387465873771;286.18449760589243	0.49008585046042963;292.429378128804;79.52387465873768;498.3471654799004	0.719037	-229.042	468.084
CL1	Bottleneck_expansion	0.9032931987290819;48.82691635865624;72.84625490321326;492.2234118430973	0.9033104843778793;48.32730308742972;72.84625490321325;497.256423370312	3.89215	-208.334	426.668
CL1	Bottleneck_expansion	0.5984513486694858;754.0931652671982;65.8418238642638;213.82282262135226	0.4679462407790158;363.5788181122742;65.84182386426382;481.9804892480783	0.611502	-245.789	501.579
CL1	Bottleneck_expansion	0.6944809032885588;1111.0299567105997;0.4047845208707157;212.60146174144822	0.697896318949505;540.8355100396434;0.40415748813357116;431.72211089303414	0.471389	-314.337	638.675
CL1	Bottleneck_expansion	0.037268920377640714;1527.660631506467;87.9084620905109;3.181372233539148	0.8715689837639246;197.5591546289721;87.90846209051091;1.0536794122687225	21.3242	-1329.14	2668.29
CL1	Bottleneck_expansion	0.8000048006265688;28.54018209532315;93.68924968426387;266.54533160836405	0.8008204038842912;19.97192394216534;93.68924968426386;379.1612348171113	9.41789	-208.332	426.663
CL1	Bottleneck_expansion	0.6248069431381361;23.38713239983052;39.49094309363069;166.99920731046646	0.6259080224501741;14.399269172361041;39.49094309363069;269.78209746567944	13.0627	-208.332	426.663
CL1	Bottleneck_expansion	0.8801032155977138;1305.6579863869008;79.10819089833656;71.47920629913857	0.8801032155977138;1305.6579863869008;79.10819089833655;71.47920629913858	0.59197	-2353.84	4717.68
CL1	Bottleneck_expansion	0.5097432314002833;844.3366695199929;50.240183811492386;249.81635231280475	0.5104451899100299;589.4886630642296;50.24018381149238;356.2384027234117	0.470549	-383.427	776.853
CL1	Bottleneck_expansion	0.5520250298807252;1665.4027726301335;28.474796452933994;220.77184672089118	0.5649303345432064;807.0729440034034;28.474796452933994;446.102652962537	0.35348	-412.081	834.163
CL1	Bottleneck_expansion	0.11616166242839115;1042.0481576503064;77.37814838017265;26.51431608096577	0.10324128617036747;56.65245531893217;77.37814838031076;494.50492056565656	3.32044	-208.344	426.687
CL1	Bottleneck_expansion	0.671905887011025;407.72285211460877;21.163452650166935;46.0536235834646	0.06462266447596979;353.41604553740416;21.163452649633424;469.58401008474254	0.628865	-245.667	501.334
CL1	Bottleneck_expansion	0.23624226106212723;839.2327927355391;28.69555338646993;368.0902273285075	0.051515988257052926;19.9224165098328;28.695553386469925;388.4123059317665	9.44129	-208.332	426.663
CL1	Bottleneck_expansion	0.40068406316186794;1241.9903109855857;58.95409369296919;41.42690298173485	0.812556936207152;31.271806731605153;58.9540936929692;498.6383513390231	6.01479	-208.332	426.663
CL1	Bottleneck_expansion	0.4726550670502243;196.26101888655248;85.31121760363129;429.10246526298357	0.4727251418779896;171.57106833617357;85.31121760363129;490.55556437312674	1.13402	-213.135	436.269
CL1	Bottleneck_expansion	0.09520947166328342;239.50377086153242;7.948455600556292;194.95338490977355	0.09346967157279014;89.39370875476907;7.948455600556292;499.15677133352136	2.10873	-208.61	427.22
CL1	Bottleneck_expansion	0.29364133388676966;1915.7045382413612;93.19119963681348;92.33810485432315	0.26614092773979925;470.7782398579643;93.19119963682954;495.8626455129106	0.501001	-269.866	549.732
CL1	Bottleneck_expansion	0.8840211014621878;895.964128083132;2.785399916149711;220.98447367713507	0.8901355787696106;437.19118168369647;2.7850023414295575;449.8297192826419	0.542709	-272.709	555.419
CL1	Bottleneck_expansion	0.2782794841189607;1641.5211484920358;52.523455392502406;253.66077358953254	0.2791565695451608;1147.206571174757;52.523455392499194;362.08131288985373	0.300401	-691	1392
CL1	Bottleneck_expansion	0.7656121053490115;204.85278804007817;71.9060135443781;82.2423639479572	0.12548107451624052;161.39117130352912;71.9060135443781;473.7082895019023	1.2026	-212.749	435.497
CL3+CL4	Bottlegrowth	67.83034917844805;898.7115075927044;55.545000240844246	27.69918349243146;972.0738040513304;154.02076412130464	10.2334	-127.299	262.598
CL3+CL4	Bottlegrowth	10.594697489673631;277.1068617721612;197.6951547385205	11.395872139911104;983.6463004416785;109.64417404293505	14.1285	-71.3316	150.663
CL3+CL4	Bottlegrowth	27.21360137670188;384.0331460002076;141.40173247324063	26.12984724850884;976.3731679990136;88.31869721190309	14.729	-72.7846	153.569
CL3+CL4	Bottlegrowth	84.04505460525486;267.6752537294093;363.6925773101931	1.7313121948343706;77.79377538995217;1.7895029127062025	434.53	-30.2967	68.5934
CL3+CL4	Bottlegrowth	93.90133453880274;229.77376357817923;171.8566966574336	28.512036101789555;998.443169918188;184.69132607935813	9.07181	-155.874	319.747
CL3+CL4	Bottlegrowth	22.246539919851575;941.5699544717197;154.0456857541238	22.114798401319312;985.7588769092075;147.56688306922385	10.774	-114.428	236.855
CL3+CL4	Bottlegrowth	47.76420116762494;725.5906373109755;280.1530757161126	37.52421150162371;986.4412901173056;114.6506586362264	11.8394	-91.254	190.508
CL3+CL4	Bottlegrowth	37.24781682941982;379.643996873542;460.61875414471905	0.013332691021979983;16.81840344281107;1.2743210870146322	1441.26	-49.2348	106.47
CL3+CL4	Bottlegrowth	97.18997500583073;192.68570469458285;108.69308548378432	13.46078346721411;998.5062168564804;153.04762212560493	11.1926	-107.595	223.191
CL3+CL4	Bottlegrowth	93.31115046927842;299.1027585085487;28.41518410910804	21.876819179215914;989.941444658945;83.31246226706648	15.6036	-67.4572	142.914
CL3+CL4	Bottlegrowth	54.62081974313085;409.4120671763765;60.80208078181837	13.687031976772072;987.4661537863383;69.0844573969569	18.7542	-58.6498	125.3
CL3+CL4	Bottlegrowth	65.12153044303624;61.344202632686084;21.84055503565474	2.5999419687961542;67.47161818445286;1.5968786840296387	451.694	-30.1986	68.3972
CL3+CL4	Bottlegrowth	1.893354900138058;66.4685301743296;449.95954750957964	1.1292306812012034;699.8354285915334;71.7228901836186	26.3471	-49.6121	107.224
CL3+CL4	Bottlegrowth	8.659062295095994;681.9338936072;499.4314430332558	7.026795195540574;998.9827437140967;89.98670583650843	16.9917	-54.0132	116.026
CL3+CL4	Bottlegrowth	96.52962111747836;480.0608706152328;378.3496251375206	88.8705515827727;765.855157635149;256.62222998235984	7.02193	-363.896	735.793
CL3+CL4	Bottlegrowth	24.575690386114704;474.44354277353654;139.95292145149074	17.76792338641636;998.5688441441085;73.45798002140711	17.3955	-63.5158	135.032
CL3+CL4	Bottlegrowth	92.67507850553338;549.5065229025083;377.5744627013988	87.22976521158573;807.5571585123936;273.8521539835771	6.67937	-367.732	743.463
CL3+CL4	Bottlegrowth	71.4471206709982;335.30699344110286;450.95989726995913	2.6640892124404565;66.7765722744476;1.5875177474453361	452.614	-30.1977	68.3955
CL3+CL4	Bottlegrowth	42.64205368606016;55.28258108081059;446.2144276447331	4.547588500488501;998.8063412554715;240.95732683213546	9.7462	-143.552	295.104
CL3+CL4	Bottlegrowth	22.496990698570457;148.5165602953692;93.89241265816366	28.696847786537347;856.8771619443032;131.55971729196017	11.5943	-124.296	256.591
CL3+CL4	Bottlegrowth	4.915457767790481;598.9543925340442;494.5675260322093	4.888454770596994;998.4949713478891;395.1557854651639	7.34956	-245.243	498.485
CL3+CL4	Bottlegrowth	73.32496588133814;82.10422875871913;357.0668890048711	16.719768500766452;990.4232958016174;129.26187242005201	12.1084	-91.8086	191.617
CL3+CL4	Bottlegrowth	12.662072716298036;268.2691381211887;21.763732942654933	11.64470896666546;942.7070746895064;68.2992177212007	19.4452	-55.9263	119.853
CL3+CL4	Bottlegrowth	19.620869608409617;955.7849448494009;37.80606996985486	4.154852556874591;838.0426348391287;75.02128020420562	21.2166	-51.2579	110.516
CL3+CL4	Bottlegrowth	81.20892719086596;589.5934523847433;295.3516512614736	99.86736191728545;827.3206259658045;183.3159197760555	8.18889	-212.845	433.689
CL3+CL4	Bottlegrowth	3.998050880794308;638.8971034246579;116.36367306974581	3.7024577597585355;982.5068441188921;76.0579608762553	20.5937	-47.676	103.352
CL3+CL4	Bottlegrowth	70.95891111773422;464.59848445354174;137.20505138067085	71.11074695770519;936.922865055632;66.33880742991377	16.1789	-208.477	424.954
CL3+CL4	Bottlegrowth	64.87029307488197;163.99503937737398;174.04812556961218	26.747644371302485;991.5619303397691;90.31214556030473	14.4238	-73.0997	154.199
CL3+CL4	Bottlegrowth	89.76550782698757;341.50446119655084;293.1355696977304	2.0443298332693347;73.88204186135476;1.7013369543396346	441.939	-30.2445	68.4889
CL3+CL4	Bottlegrowth	5.445837530456776;525.2175020854868;113.4772680998512	7.812419577211943;952.7139980680439;76.23906909904906	18.9083	-51.9568	111.914
CL3+CL4	Bottlegrowth	95.05614602363875;959.2125288808262;381.1567002963973	95.05614602363873;959.2125288808263;381.15670029639733	5.23468	-432.16	872.321
CL3+CL4	Bottlegrowth	79.17195472798352;702.1920255433851;139.96618493806218	64.24130888444829;960.0344420387556;129.4484764781093	10.324	-115.386	238.772
CL3+CL4	Bottlegrowth	49.95248196755995;366.6414175991596;4.675208467930347	1.5785799532266809;338.982111987337;23.253973501976557	63.0631	-47.408	102.816
CL3+CL4	Bottlegrowth	44.21517220532348;780.8751093681175;136.84184562388367	44.51933762750071;949.0591196608049;115.84732457648364	11.6212	-99.1421	206.284
CL3+CL4	Bottlegrowth	80.28281527509294;986.8253799980473;494.72260674696383	80.28281527509293;986.8253799980474;494.72260674696395	4.66566	-517.924	1043.85
CL3+CL4	Bottlegrowth	38.05764082938141;967.0758336677604;294.75158100522486	38.05764082938142;967.0758336677605;294.751581005225	6.7687	-292.153	592.307
CL3+CL4	Bottlegrowth	49.828660878587044;906.3241491375852;302.12551739690855	49.48964529827923;998.5792845144111;278.7298892151867	6.66344	-275.502	559.003
CL3+CL4	Bottlegrowth	56.5001266500066;458.8156766903028;238.9379313771749	0.05422643477763747;996.4215424386563;184.7310855578516	16.5729	-55.4466	118.893
CL3+CL4	Bottlegrowth	67.03848542270089;546.1617242913752;8.972821329124415	1.0794757392282635;173.80435801358158;10.757092756105095	126.719	-46.3195	100.639
CL3+CL4	Bottlegrowth	94.57208155878341;573.8807925234236;155.5791257153823	72.93115200483996;977.465668597341;118.84711599657919	10.7108	-113.72	235.441
CL3+CL4	Bottlegrowth	97.81940717547978;246.46087173773338;8.9712367732675	1.8287526822133744;300.082618683775;21.27190395032246	67.3758	-47.944	103.888
CL3+CL4	Bottlegrowth	9.35247837590726;393.68896491939967;218.6433788939765	4.532727737683531;818.6636115156076;90.13783612365735	18.7413	-61.2521	130.504
CL3+CL4	Bottlegrowth	93.22911261090242;327.64472478465217;41.27671156831858	33.90631844545633;539.4141695160596;57.49130466463754	21.5514	-104.273	216.546
CL3+CL4	Bottlegrowth	77.92813580865096;370.7010945568465;275.49999355302776	63.38214530299523;977.2216367078066;144.60408976867447	9.59254	-125.347	258.695
CL3+CL4	Bottlegrowth	22.24122552949584;518.6998765609742;397.5618757233358	17.42829469214002;998.8139406742183;126.82932350916828	12.1646	-89.2227	186.445
CL3+CL4	Bottlegrowth	71.43727990045312;773.7172474770151;283.51113621953834	99.85486162574918;788.581688625146;165.10175592081464	8.83655	-197.244	402.488
CL3+CL4	Bottlegrowth	12.4373308480495;190.13021335932243;164.30715366225817	0.7192015340112967;81.89585506082452;2.1999663651381476	428.582	-30.3758	68.7517
CL3+CL4	Bottlegrowth	86.90097008957723;726.4526617691369;101.16921780331079	61.01406330384394;998.0102464092153;106.02125058388981	11.7437	-104.763	217.527
CL3+CL4	Bottlegrowth	60.112686492275934;654.0911792873013;361.63117167774004	56.67395797431365;968.6445672538994;264.6914540910144	6.79799	-274.114	556.228
CL3+CL4	Bottlegrowth	52.95629081667965;829.442450754784;408.89525509761876	57.48699171363275;995.357428353031;115.78129436228271	11.1591	-102.236	212.473
CL2	Bottlegrowth	19.430595548928224;465.7213247882002;206.52720261885932	12.203851622982807;584.5161772449002;177.798685938766	8.22843	-115.227	238.453
CL2	Bottlegrowth	3.750768274507946;391.2112049560989;437.6237756535573	6.194539788574725;549.5581468120654;188.83182572730902	8.86133	-114.851	237.702
CL2	Bottlegrowth	94.03996681952576;247.99365690846824;421.1554687374439	29.849274955481857;996.458954440841;294.8091408224577	4.66838	-116.349	240.699
CL2	Bottlegrowth	76.54164454177891;576.279250419617;76.91607892151403	18.461447988864975;889.1980700729717;267.74849636006013	5.4426	-115.243	238.486
CL2	Bottlegrowth	32.58729587218368;602.9451237352715;162.9558926454631	14.671462755367225;917.6449703134076;294.4944904828401	5.27257	-114.945	237.889
CL2	Bottlegrowth	77.11457736114804;913.3599521487828;275.29789674237713	67.91749859503948;995.7034963650127;279.46580340927903	4.30304	-124.06	256.121
CL2	Bottlegrowth	74.18384336990708;478.69403308618587;166.85401541387844	61.95066262794485;990.0463287193181;269.26908513003235	4.45451	-123.179	254.357
CL2	Bottlegrowth	94.12429391859783;554.1784959000869;467.709701333354	90.79125984211345;654.4378403691398;411.0441345780122	3.96038	-195.635	399.27
CL2	Bottlegrowth	6.783717966232038;423.4669553422214;407.90225208860375	0.24575334993837378;11.613826841138804;3.5830465804962253	407.416	-113.587	235.175
CL2	Bottlegrowth	61.58358973380034;508.0022532638696;437.4897975188876	99.70151088021545;667.9246230339656;269.10968119484005	4.75949	-147.158	302.316
CL2	Bottlegrowth	32.419579112296965;374.5239134153916;64.41331635353559	10.650357456829532;854.7962268364317;290.55037441689683	5.66185	-114.863	237.726
CL2	Bottlegrowth	9.863881980076275;983.1059666486362;26.037352640960243	10.551310980799295;310.04810287505586;87.32873176672852	15.1322	-116.868	241.735
CL2	Bottlegrowth	51.0530271113616;903.7695768890623;243.9969401445145	41.443712417139885;998.9705752058293;291.9459029795042	4.48464	-118.4	244.8
CL2	Bottlegrowth	71.00695290867999;511.46285452037733;252.2593759047173	3.0730565307934326;193.26422224125136;59.979814904010475	25.5006	-114.963	237.925
CL2	Bottlegrowth	59.837807876955125;505.07727439014025;28.4876817237244	85.94035549307534;473.5597767596999;131.61042557969546	8.021	-149.871	307.743
CL2	Bottlegrowth	32.50652335375232;663.4643697756306;420.38726509344883	0.5317079318023695;154.6120283185547;66.93987595037932	31.5576	-114.844	237.689
CL2	Bottlegrowth	11.670394355535452;89.54148673183818;403.76385995262007	5.230085562415315;446.21923557098637;154.72364351657447	10.8109	-114.86	237.721
CL2	Bottlegrowth	10.939690338570134;222.85682236728846;90.05449578603297	2.2670411220349123;500.5246742927366;220.66192896030307	9.40531	-115.024	238.048
CL2	Bottlegrowth	54.648354346247466;207.78354480039118;344.00047433509525	21.556250117986213;978.6677913953174;289.90061572251466	4.9499	-115.372	238.745
CL2	Bottlegrowth	98.7136059667671;319.2998569852261;10.644193326696028	0.018431019363027403;26.055060631632415;14.612368854953392	185.989	-114.842	237.683
CL2	Bottlegrowth	68.97560760743048;629.5171651174107;385.10397300003416	37.481794207765226;994.6192831183794;306.8630360147548	4.43298	-118.017	244.033
CL2	Bottlegrowth	13.875164627768752;510.97066708039887;34.03276875646555	10.138855871772495;283.3326281997108;74.01207042123193	17.1346	-117.741	243.483
CL2	Bottlegrowth	67.70256206214032;387.8112577790765;477.3662922900218	15.938129294771562;759.3290605783743;229.93500161005704	6.34503	-115.246	238.492
CL2	Bottlegrowth	37.179044720227715;459.824883851738;492.3328724836606	6.703793107191994;995.6500711314396;385.1254413269899	4.86593	-114.844	237.687
CL2	Bottlegrowth	93.23074119184558;248.6168917237142;171.60835017250957	16.562760986722076;990.0548004191979;316.3649542884669	4.87018	-114.979	237.957
CL2	Bottlegrowth	20.713548290194726;693.2011814812184;445.8055836340838	51.70581141862399;988.2343753649984;334.1719245739182	4.0639	-122.934	253.868
CL2	Bottlegrowth	69.97059180742853;276.6623631207165;306.63650989877067	13.34104661872147;996.825788726024;354.5645551428238	4.69976	-115.106	238.211
CL2	Bottlegrowth	50.172598849819536;880.4682638744333;206.3131805286187	35.11743472843842;995.8531648933513;265.2527255499336	4.83759	-117.735	243.469
CL2	Bottlegrowth	68.41967986814699;722.3961289995651;182.8245274043784	46.39397420394262;998.9302307620567;275.18213929076984	4.56167	-119.529	247.059
CL2	Bottlegrowth	6.306452157600556;87.92703813677096;357.2311647312814	5.5943027205720135;316.94823180918814;100.78313014799745	15.1471	-115.002	238.003
CL2	Bottlegrowth	75.89894591260143;617.053736574712;488.53467043424865	10.367512780547646;885.3410697977248;297.99027334306055	5.53602	-114.867	237.735
CL2	Bottlegrowth	94.45241720032509;417.30873384698566;316.49440728447695	35.625110360892926;995.5405045058887;262.235073901883	4.85932	-117.977	243.954
CL2	Bottlegrowth	24.393645480495778;367.31784668513495;385.9431462835057	5.976216643847723;949.2398035616425;394.3141128773552	4.95031	-115.046	238.091
CL2	Bottlegrowth	94.89421678030557;896.1326868730032;390.733313060066	93.06689646426851;984.4108579228733;359.9504557337445	3.6122	-134.033	276.065
CL2	Bottlegrowth	12.531899198941623;521.9881625265527;165.08853448994898	12.177361798678767;556.2002761917232;166.3481293377044	8.67089	-115.315	238.629
CL2	Bottlegrowth	47.92977421071793;532.0724601199216;392.646572333907	4.949985669582773;402.84684409125674;135.88536217601123	12.0828	-114.858	237.715
CL2	Bottlegrowth	22.390974949084622;102.09558816527505;128.0040990119896	7.331865116643664;494.3922018404397;159.08538053424354	9.86523	-114.911	237.821
CL2	Bottlegrowth	62.58835764114275;843.5336851213923;473.3400806834604	0.7004252219586139;552.0536165293371;282.81772742079863	8.80837	-114.839	237.678
CL2	Bottlegrowth	3.1025484636079215;97.17036569731023;275.6619867169381	19.63332586282295;976.2826053954791;339.004088746113	4.61761	-116.008	240.015
CL2	Bottlegrowth	19.162370165877615;969.8284198084563;111.44018516007137	9.306163732466961;863.2320276854739;394.3804360098432	4.89295	-118.519	245.038
CL2	Bottlegrowth	88.99833252425304;409.94182117150064;291.9628605384071	0.02154556213704604;3.2890337668995913;0.26627741941564875	3054.84	-68.5083	145.017
CL2	Bottlegrowth	34.26583946604104;911.3715382004054;182.16761588983877	28.082212179236414;996.4592832602914;279.82665229636024	4.8411	-116.21	240.421
CL2	Bottlegrowth	43.723419008188664;318.702648831767;361.2182809481551	5.695727469794983;599.0040513470639;211.96866715825405	8.16344	-114.851	237.701
CL2	Bottlegrowth	79.00104494076776;873.2495311206627;233.9322755125816	62.345948894688355;991.8574983694841;287.7892624320953	4.28746	-122.771	253.542
CL2	Bottlegrowth	22.136811105125847;813.6246739806116;435.9893706204561	21.16864658479115;998.8035218792537;372.9944710346801	4.31798	-117.576	243.153
CL2	Bottlegrowth	0.253160248384364;333.1021148564348;213.6256547317776	0.24887931302342506;361.0091005295882;198.28954334447693	13.5981	-114.859	237.717
CL2	Bottlegrowth	42.3059441960982;516.3293805442643;366.60261868237774	0.9000644228435977;193.7094404133029;86.80157075440574	24.0364	-115.175	238.35
CL2	Bottlegrowth	79.36653294942286;900.9779796519907;393.65291713439916	68.5888494557158;995.9850551437534;390.2127308640419	3.59846	-132.834	273.667
CL2	Bottlegrowth	54.48617440895397;985.9335252850176;89.5194765261491	20.75706787965332;984.8675225582597;226.14171427695746	5.69219	-120.17	248.339
CL2	Bottlegrowth	13.618378727242453;558.0242213262795;47.00949175743169	6.413035920875701;315.73105743516754;96.20160612391318	15.2728	-115.15	238.299
CL1	Bottlegrowth	80.24240092515515;67.3438406466349;255.95801567499794	99.37984792110889;48.04982637723554;289.23639436529845	3.61945	-202.601	413.202
CL1	Bottlegrowth	64.49437468932139;534.8530818716268;146.4395111878427	98.1156625319544;145.6225151517955;229.5630406096699	1.53789	-238.465	484.929
CL1	Bottlegrowth	28.002681826004615;506.0297954550255;166.30319208246652	0.2644037540198852;0.013800871161291235;0.27408436709367817	11210.3	-198.783	405.566
CL1	Bottlegrowth	16.591361180536037;353.28178870198514;167.24015791057522	0.198087946525272;0.013120438415570425;0.24471497248023216	11843.9	-198.779	405.557
CL1	Bottlegrowth	69.41104232714699;364.32209272558356;261.1863610089204	91.3905033252539;219.94621533559138;325.9001303817547	1.09374	-251.088	510.176
CL1	Bottlegrowth	68.98573846512548;958.4049106284274;415.49321098908723	70.22290198445634;788.7770650732367;487.43189966647935	0.457518	-378.326	764.651
CL1	Bottlegrowth	66.04094160901367;819.6013340260114;412.35472050988403	0.2695885766066986;0.014194556450407004;0.2796919156934171	10886.2	-198.785	405.57
CL1	Bottlegrowth	87.78857960337297;993.4442453992225;382.2326617424025	88.64161448497455;825.0070111096755;453.39093485822025	0.444855	-389.626	787.251
CL1	Bottlegrowth	75.91173322122914;948.4324633838379;230.1652123274035	98.89834439062652;111.67989021493864;174.228973183938	1.94387	-235.124	478.248
CL1	Bottlegrowth	39.495216887219854;571.5420665622952;371.1984896585651	0.041284813037682305;0.016530349266182635;0.14032551248357822	9348.41	-198.548	405.096
CL1	Bottlegrowth	9.453687092186208;478.0592655184747;449.30405451489327	9.635463426467558;433.33314565758724;485.2634765003366	0.794685	-356.613	721.226
CL1	Bottlegrowth	95.02909361267906;455.16810483457346;380.3332647853876	98.2783326334245;375.1688447214554;445.8565651868701	0.711376	-276.911	561.822
CL1	Bottlegrowth	15.121000660105802;526.0253735977518;414.77742892862494	99.63786011696709;411.7028731543994;489.07613840056956	0.65433	-279.023	566.046
CL1	Bottlegrowth	62.47451071024366;807.3904664937982;314.9735568215719	93.52924971760858;433.63122836515623;375.8106997620262	0.682499	-311.224	630.448
CL1	Bottlegrowth	23.91298144099001;209.40712946353221;121.52492735882619	99.70591533415887;42.21688616165454;108.6036118498358	4.16596	-207.063	422.127
CL1	Bottlegrowth	50.75967431659612;967.890575009725;154.98557105682605	0.46630993607492605;0.014616278223885143;0.3342423376488039	10567.7	-198.796	405.592
CL1	Bottlegrowth	74.55312915241626;445.8087602235238;304.5224406409133	98.63365790299015;270.8826256795481;382.64433275955594	0.911442	-256.904	521.808
CL1	Bottlegrowth	73.36841413705316;25.572994416351364;64.77684828766728	97.92803334285024;10.798679994518062;111.42609659061239	14.2975	-199.184	406.368
CL1	Bottlegrowth	23.95622861017423;273.93276313835196;187.3347179157892	98.45816657677315;81.15544652637875;181.93604021570619	2.4081	-215.899	439.799
CL1	Bottlegrowth	61.157046148752244;500.78110604638334;270.31489918308006	98.21291060847801;277.9318672274287;327.05925507366595	0.929201	-270.542	549.083
CL1	Bottlegrowth	84.66756735501278;107.01275943168275;33.653835533576036	94.6060974874327;46.405828312804246;69.32326723127602	4.27723	-232.011	472.022
CL1	Bottlegrowth	85.29099040328408;649.7812010261791;170.29308901233665	95.27780639592213;287.5388592426314;342.7004403848261	0.902251	-270.96	549.921
CL1	Bottlegrowth	7.594672477362614;911.7843552746419;494.9092902651415	7.594672477362614;911.7843552746418;494.9092902651413	0.514553	-482.468	972.935
CL1	Bottlegrowth	99.99984582331393;109.40878848145785;142.02931070293755	99.99984582331398;109.4087884814578;142.02931070293755	2.06074	-247.777	503.555
CL1	Bottlegrowth	94.03963246734946;444.87748554981124;424.31435112091884	97.99987871691066;365.7116323195906;494.86403306275037	0.706647	-267.132	542.264
CL1	Bottlegrowth	99.38113726279303;798.4935791831604;432.9008060533195	99.38113726279308;798.4935791831607;432.90080605331957	0.454236	-388.16	784.32
CL1	Bottlegrowth	18.390713100182314;294.1290557041011;88.68778499510161	0.010258232154725655;0.011470358461168466;0.061239362482256046	14070.6	-198.08	404.161
CL1	Bottlegrowth	41.365129218738026;79.17804116162652;494.84405416056006	41.36512921873802;79.17804116162652;494.84405416056	2.51345	-214.566	437.132
CL1	Bottlegrowth	76.06687903446064;716.4772415212467;436.86756265814074	77.22203183831812;649.747987630655;472.52161099300383	0.512096	-348.196	704.392
CL1	Bottlegrowth	10.024607521089722;48.806266257561404;371.9074654609098	99.38554542717948;13.994217053724457;122.63959072364047	11.0486	-199.259	406.518
CL1	Bottlegrowth	18.75708793128366;579.0399730217465;406.12445141296286	0.01823446117591535;0.012548590687931502;0.08395207391098679	12376.8	-198.266	404.532
CL1	Bottlegrowth	31.381470082197666;68.95214488443891;299.8844686526574	49.06436612371873;30.249825017980342;436.84869455383955	6.08242	-206.339	420.678
CL1	Bottlegrowth	63.22719401783065;969.3481074099686;306.5799810591499	94.7216036742055;538.8797654463987;405.09255900689243	0.585278	-333.067	674.134
CL1	Bottlegrowth	73.14436971117081;285.12189651256114;162.64677193306997	90.44879266956;123.33678425600657;302.43582188575937	1.66979	-220.528	449.055
CL1	Bottlegrowth	98.18844271794985;14.27896093804689;206.30721589949934	98.18844271794981;14.278960938046891;206.3072158994994	11.7921	-200.789	409.578
CL1	Bottlegrowth	24.210876439276625;157.60281347727332;464.77199159146596	95.19605090220035;85.2915542360194;205.69647055341113	2.29236	-214.985	437.971
CL1	Bottlegrowth	90.92201017147762;185.32653221909328;497.20416735801064	90.92201017147764;185.32653221909337;497.2041673580106	1.15506	-225.51	459.019
CL1	Bottlegrowth	4.951778421956623;521.032509924766;39.049886186712904	94.42399741969882;6.645950761261234;88.71999941278956	23.3016	-199.102	406.203
CL1	Bottlegrowth	8.509229168639939;812.1843897751526;491.27303271181205	8.509229168639939;812.1843897751525;491.273032711812	0.546197	-458.429	924.857
CL1	Bottlegrowth	88.20430312580046;446.238058569722;391.96215527887733	91.63190251964977;367.19209402441004;458.06921919880705	0.722742	-274.569	557.138
CL1	Bottlegrowth	51.362763080562296;212.4305412439468;303.9688532554015	96.79817204002921;105.22721420850222;324.32405330649357	1.85589	-213.133	434.265
CL1	Bottlegrowth	26.486795345214137;410.5127271669565;361.7245663995886	83.2135432868239;189.2031123362455;281.87864612197956	1.26128	-249.55	507.1
CL1	Bottlegrowth	33.40590735459417;195.90006633739978;25.68510623980774	97.26326695205096;31.472794097051413;53.87718566566026	5.82383	-221.877	451.753
CL1	Bottlegrowth	74.81118120173954;415.35157231550613;5.640036769474721	76.8464463113583;0.05458040505408885;2.445347293324841	2824.82	-198.855	405.71
CL1	Bottlegrowth	83.74818758204461;25.015651219797185;424.2160158142653	83.74818758204458;25.015651219797185;424.2160158142651	7.14734	-204.113	416.225
CL1	Bottlegrowth	21.517624340148814;805.6662151165398;197.6014328027625	94.28234013406498;67.78089920807972;85.97024328845536	3.18489	-247.32	502.641
CL1	Bottlegrowth	35.1167838398341;450.8379571609915;22.152205635066924	91.3498787904236;14.32903409315218;50.20768617841638	10.4023	-201.446	410.892
CL1	Bottlegrowth	5.192060220989778;712.0813642009633;450.2218528101172	5.192060220989778;712.0813642009632;450.2218528101171	0.630067	-463.251	934.502
CL1	Bottlegrowth	81.66619361860242;91.59344324115277;94.42297906582337	97.39420760927716;40.6474657898582;176.8938325513653	4.16348	-201.876	411.751
CL1	Bottlegrowth	72.90597684618548;149.05291816156333;322.3008061915754	86.21359623549458;96.72353573287272;419.6903576751867	1.98594	-210.642	429.283
