# Supplementary material for: Emergence and diversification of a highly invasive chestnut pathogen lineage across southeastern Europe
Source: eLife. 2021 Mar 5;10:e56279. doi: 10.7554/eLife.56279 (PMC7935491; doi:10.7554/eLife.56279)
Supplement: Supplementary file 3. — Putative functions are shown by (PFAM) Protein families (database) and Gene Ontology (GO) annotations. Single nucleotide polymorphisms (SNPs) and the corresponding composite μ statistic are shown. [file elife-56279-supp3.xlsx]

## Sheet: Tabelle1
Supplementary Table 2: List of the genes in regions with signatures of recent positive selection (based on RAiSD). Putative functions are shown by PFAM and Gene Ontology (GO) annotations. SNPs and the corresponding composite μ statistic are shown.
scaffold	start	stop	geneID	PFAM	GO	top_SNP	mu-statistic
scaffold_1	2098376	2100657	estExt_Genewise1.C_11336	Putative Sin3 binding protein	NA	2099363	4.387e+01
scaffold_1	2102218	2103809	e_gw1.1.2348.1	NA	NA	NA	NA
scaffold_1	2104491	2104968	e_gw1.1.1829.1	NA	NA	NA	NA
scaffold_1	2105295	2106289	fgenesh1_pg.1_#_559	Ribosomal protein L24e	NA	NA	NA
scaffold_1	2106550	2107759	estExt_fgenesh1_kg.C_10224	Protein of unknown function (DUF3602)	NA	NA	NA
scaffold_1	2113719	2115664	estExt_fgenesh1_pm.C_10455	NA	GO:0003676	2113979	2.281e+01
scaffold_1	2116692	2117666	gw1.1.2803.1	NA	NA	NA	NA
scaffold_1	2118340	2120730	gw1.1.3666.1	Inhibitor of growth proteins N-terminal histone-binding	NA	NA	NA
scaffold_1	2121702	2122260	gw1.1.1738.1	NA	NA	NA	NA
scaffold_1	2124949	2128457	estExt_Genewise1Plus.C_11349	NA	GO:0005515	NA	NA
scaffold_1	2128998	2129777	fgenesh1_kg.1_#_226_#_CLS_2622_singleton_cp155-051A06	Dolichol phosphate-mannose biosynthesis regulatory protein (DPM2)	GO:0019348|GO:0030176|GO:0030234	NA	NA
scaffold_1	2130337	2132229	e_gw1.1.421.1	MA3 domain	GO:0003723|GO:0005515	NA	NA
scaffold_1	2134192	2135016	fgenesh1_pg.1_#_566	Glucosamine-6-phosphate isomerases/6-phosphogluconolactonase	GO:0005975|GO:0006098|GO:0017057|GO:0005975	NA	NA
scaffold_1	2137560	2138661	Crypa1.e_gw1.1.3005.1	HAD-hyrolase-like, Haloacid dehalogenase-like hydrolase	NA	NA	NA
scaffold_1	2142345	2144060	e_gw1.1.598.1	SET domain	GO:0005515	NA	NA
scaffold_1	2146239	2150995	estExt_Genewise1.C_11378	ABC transporter, ABC transporter, ABC transporter transmembrane region, ABC transporter transmembrane region	GO:0005524|GO:0016021|GO:0005524|GO:0016021|GO:0042626|GO:0055085|GO:0005524|GO:0016887	NA	NA
scaffold_1	2152912	2153548	estExt_fgenesh1_kg.C_10227	NA	NA	NA	NA
scaffold_1	2154191	2155986	estExt_fgenesh1_kg.C_10228	O-methyltransferase	GO:0008171|GO:0008168	NA	NA
scaffold_1	2157327	2159107	fgenesh1_kg.1_#_229_#_1731_1_CCBH_CCBI_EXTA	FAD binding domain, FAD binding domain	GO:0071949	NA	NA
scaffold_1	2161769	2169113	Crypa1.estExt_Genewise1Plus.C_11141	Beta-ketoacyl synthase, C-terminal domain, Starter unit:ACP transacylase in aflatoxin biosynthesis, Polyketide synthase dehydratase, Ketoacyl-synthetase C-terminal extension, Phosphopantetheine attachment site, Phosphopantetheine attachment site, Beta-ketoacyl synthase, N-terminal domain, Thioesterase domain, Acyl transferase domain	GO:0016740|GO:0031177|GO:0003824|GO:0009058|GO:0016788	NA	NA
scaffold_1	2169219	2170583	estExt_Genewise1Plus.C_11378	Methyltransferase domain	NA	NA	NA
scaffold_1	2171865	2181654	fgenesh1_pm.1_#_474	Tryptophan halogenase, Tryptophan halogenase	NA	NA	NA
scaffold_1	2182991	2184813	gw1.1.2517.1	Major Facilitator Superfamily	GO:0016021|GO:0055085	NA	NA
scaffold_1	2185479	2186644	fgenesh1_pm.1_#_476	NA	GO:0016787	NA	NA
scaffold_1	2187251	2189236	e_gw1.1.525.1	Aminotransferase class I and II	GO:0003870|GO:0030170|GO:0033014|GO:0009058|GO:0030170|GO:0016740|GO:0003824	NA	NA
scaffold_1	2190539	2191202	Crypa1.estExt_fgenesh1_kg.C_10254	NA	NA	NA	NA
scaffold_1	2191410	2197756	estExt_fgenesh1_pg.C_10574	Helicase conserved C-terminal domain, SNF2 family N-terminal domain	GO:0005524	NA	NA
scaffold_1	2198620	2200415	estExt_Genewise1Plus.C_11397	Eukaryotic glutathione synthase, ATP binding domain, Eukaryotic glutathione synthase	GO:0004363|GO:0005524|GO:0006750|GO:0004363|GO:0005524|GO:0004363|GO:0005524|GO:0006750|GO:0016874	NA	NA
scaffold_1	2200438	2201415	estExt_Genewise1Plus.C_11398	Single-strand binding protein family	GO:0003697|GO:0003697|GO:0006260	NA	NA
scaffold_1	2202961	2204067	Crypa1.gw1.1.2685.1	Pheromone A receptor	GO:0004932|GO:0007186|GO:0016021	NA	NA
scaffold_1	2205372	2206202	fgenesh1_pg.1_#_584	NA	NA	NA	NA
scaffold_1	2209324	2213290	Crypa1.estExt_fgenesh1_pm.C_10397	NA	NA	NA	NA
scaffold_1	2213450	2214370	Crypa1.estExt_fgenesh1_kg.C_10257	NA	NA	NA	NA
scaffold_1	2216035	2217201	e_gw1.1.1284.1	Phosphoenolpyruvate phosphomutase	GO:0003824	NA	NA
scaffold_1	2218245	2221478	Crypa1.fgenesh1_pg.C_scaffold_1000583	Protein kinase domain, Domain of unknown function (DUF3543)	GO:0004672|GO:0005524|GO:0006468|GO:0004672|GO:0006468|GO:0005524|GO:0004674	NA	NA
scaffold_1	2227622	2230435	Crypa1.estExt_Genewise1Plus.C_11170	Aminotransferase class-III	GO:0008483|GO:0030170|GO:0003824|GO:0004587	NA	NA
scaffold_1	2231375	2233499	Crypa1.estExt_Genewise1Plus.C_11173	Alg9-like mannosyltransferase family	GO:0000030|GO:0006506|GO:0016757	NA	NA
scaffold_1	2233715	2235558	fgenesh1_pm.1_#_485	Major Facilitator Superfamily	GO:0016021|GO:0055085	NA	NA
scaffold_1	2240368	2241106	gw1.1.3239.1	RhoGAP domain	GO:0007165	NA	NA
scaffold_1	2250392	2250855	Crypa1.fgenesh1_pg.C_scaffold_1000589	Transmembrane proteins 14C	GO:0016020	NA	NA
scaffold_1	2269754	2271664	estExt_fgenesh1_kg.C_10234	Cyclin	GO:0000079|GO:0019901	NA	NA
scaffold_1	2273033	2274613	estExt_Genewise1Plus.C_11429	2OG-Fe(II) oxygenase superfamily	GO:0016491|GO:0055114|GO:0005506|GO:0016705|GO:0031418|GO:0055114	NA	NA
scaffold_1	2275338	2276112	fgenesh1_kg.1_#_235_#_3836_0_CCBI2148.g1_CCBH_CCBI_EXTA	NA	NA	NA	NA
scaffold_1	2278079	2280321	estExt_fgenesh1_kg.C_10238	NA	NA	NA	NA
scaffold_1	2285005	2286141	fgenesh1_pg.1_#_599	NA	NA	NA	NA
scaffold_1	2286228	2287588	fgenesh1_kg.1_#_240_#_2451_1_CCBH_CCBI_EXTA	Transcriptional regulation of mitochondrial recombination	NA	NA	NA
scaffold_1	2288011	2291275	estExt_Genewise1Plus.C_11438	C-terminal, D2-small domain, of ClpB protein, ATPase family associated with various cellular activities (AAA), Clp amino terminal domain, pathogenicity island component, AAA domain (Cdc48 subfamily)	GO:0005524|GO:0019538	NA	NA
scaffold_1	2291933	2293289	fgenesh1_pg.1_#_602	Domain of unknown function (DUF3328)	GO:0043386	NA	NA
scaffold_1	2294048	2296270	estExt_fgenesh1_pm.C_10492	Zinc-binding dehydrogenase, Alcohol dehydrogenase GroES-like domain	GO:0055114|GO:0008270|GO:0016491|GO:0055114	NA	NA
scaffold_1	2297360	2300241	gw1.1.219.1	ATPase family associated with various cellular activities (AAA)	GO:0005524	NA	NA
scaffold_1	2301703	2303398	gw1.1.3837.1	NA	NA	NA	NA
scaffold_1	2305064	2306133	estExt_Genewise1Plus.C_11452	Protein of unknown function (DUF2985)	NA	NA	NA
scaffold_1	2306903	2307342	fgenesh1_pg.1_#_607	NA	NA	NA	NA
scaffold_1	2307889	2309694	estExt_Genewise1.C_11468	Nucleotide-sugar transporter	GO:0016021|GO:0000139|GO:0015165|GO:0016021|GO:0090481	NA	NA
scaffold_1	2309856	2311322	estExt_fgenesh1_kg.C_10245	Yippee zinc-binding/DNA-binding /Mis18, centromere assembly	NA	NA	NA
scaffold_1	2312048	2313229	e_gw1.1.4149.1	Calcineurin-like phosphoesterase	GO:0016787	NA	NA
scaffold_1	2315147	2316676	gw1.1.2322.1	Arylsulfotransferase (ASST)	NA	NA	NA
scaffold_1	2318589	2319705	fgenesh1_pg.1_#_612	NA	NA	NA	NA
scaffold_1	2321741	2323740	Crypa1.fgenesh1_pg.C_scaffold_1000607	NA	NA	NA	NA
scaffold_1	2323789	2324551	gw1.1.1001.1	SNF2 family N-terminal domain	GO:0005524	NA	NA
scaffold_1	2326631	2327304	Crypa1.fgenesh1_pg.C_scaffold_1000608	NA	NA	NA	NA
scaffold_1	2327639	2330159	fgenesh1_pm.1_#_502	Adaptor complexes medium subunit family, Clathrin adaptor complex small chain	GO:0006890|GO:0030126	NA	NA
scaffold_1	2330158	2332692	fgenesh1_pg.1_#_615	Protein of unknown function (DUF2420)	NA	NA	NA
scaffold_1	2332869	2333624	Crypa1.estExt_fgenesh1_kg.C_10271	NA	NA	NA	NA
scaffold_1	2336578	2339020	estExt_Genewise1.C_11485	Magnesium transporter NIPA	GO:0015095|GO:0015693|GO:0016021	NA	NA
scaffold_1	2339829	2340230	Crypa1.gw1.1.3135.1	Domain of unknown function (DUF4112)	NA	NA	NA
scaffold_1	2340965	2342509	Crypa1.estExt_Genewise1Plus.C_11233	Ribosomal protein S3, C-terminal domain, KH domain	GO:0003735|GO:0005840|GO:0006412|GO:0003723|GO:0003735|GO:0006412|GO:0015935	NA	NA
scaffold_1	2342843	2345202	estExt_Genewise1.C_11491	Myotubularin-like phosphatase domain	GO:0004725|GO:0016311	NA	NA
scaffold_1	2346949	2349598	fgenesh1_pm.1_#_506	Anaphase-promoting complex subunit 4 WD40 domain, Anaphase-promoting complex, cyclosome, subunit 4	GO:0005680|GO:0030071|GO:0031145|GO:0005515	NA	NA
scaffold_1	2349973	2351249	Crypa1.fgenesh1_pg.C_scaffold_1000616	NA	NA	NA	NA
scaffold_1	2355047	2356338	estExt_fgenesh1_kg.C_10249	NA	NA	NA	NA
scaffold_1	2356945	2357772	estExt_fgenesh1_kg.C_10250	NA	NA	NA	NA
scaffold_1	2358393	2359356	fgenesh1_pg.1_#_624	NA	NA	NA	NA
scaffold_1	2362936	2363888	e_gw1.1.4651.1	ATPase family associated with various cellular activities (AAA)	GO:0005524	NA	NA
scaffold_1	2363945	2364706	fgenesh1_kg.1_#_251_#_3962_0_CCBI3409.g1_CCBH_CCBI_EXTA	NA	NA	NA	NA
scaffold_1	2366173	2366781	Crypa1.fgenesh1_kg.C_scaffold_1000278	NA	NA	NA	NA
scaffold_1	2366837	2368634	estExt_Genewise1Plus.C_11491	Macrophage migration inhibitory factor (MIF)	NA	NA	NA
scaffold_1	2369178	2370954	fgenesh1_pg.1_#_627	NA	NA	NA	NA
scaffold_1	2373804	2375332	estExt_Genewise1Plus.C_11494	Gtr1/RagA G protein conserved region	GO:0005525	NA	NA
scaffold_1	2375638	2378142	fgenesh1_pm.1_#_512	NA	NA	NA	NA
scaffold_1	2379959	2381170	fgenesh1_kg.1_#_253_#_1676_1_CCBH_CCBI_EXTA	Glutathione S-transferase, C-terminal domain, Glutathione S-transferase, N-terminal domain	GO:0005515	NA	NA
scaffold_1	2381821	2382524	estExt_fgenesh1_kg.C_10254	NA	NA	NA	NA
scaffold_1	2382640	2383490	gw1.1.3209.1	Sin3 associated polypeptide p18 (SAP18)	NA	NA	NA
scaffold_1	2384480	2385170	fgenesh1_kg.1_#_255_#_3285_0_CCBH2331.b1_CCBH_CCBI_EXTA	Prp18 domain	GO:0005681|GO:0008380|GO:0008380	NA	NA
scaffold_1	2385156	2387087	Crypa1.estExt_fgenesh1_pg.C_10622	26S proteasome subunit RPN7, PCI domain	GO:0000338|GO:0008180	NA	NA
scaffold_1	2392117	2395883	estExt_Genewise1Plus.C_11517	Fungal Zn(2)-Cys(6) binuclear cluster domain, Fungal specific transcription factor domain	GO:0003677|GO:0005634|GO:0006351|GO:0008270|GO:0000981|GO:0005634|GO:0006355|GO:0008270	NA	NA
scaffold_1	2397521	2399495	estExt_fgenesh1_kg.C_10258	RNA recognition motif. (a.k.a. RRM, RBD, or RNP domain), RNA recognition motif. (a.k.a. RRM, RBD, or RNP domain)	GO:0003676	NA	NA
scaffold_1	2402232	2407224	estExt_Genewise1.C_11535	Protein kinase domain	GO:0004672|GO:0006468|GO:0004672|GO:0005524|GO:0006468|GO:0005524	NA	NA
scaffold_1	2410816	2414607	estExt_fgenesh1_pg.C_10629	NA	NA	NA	NA
scaffold_1	2415066	2416238	estExt_fgenesh1_kg.C_10259	Methyltransferase domain	GO:0008168	NA	NA
scaffold_1	2416226	2419400	estExt_fgenesh1_pm.C_10519	HEAT repeats	NA	NA	NA
scaffold_1	2420010	2422997	estExt_Genewise1Plus.C_11532	B3/4 domain, tRNA synthetase B5 domain	GO:0000287|GO:0003723|GO:0005524|GO:0006432|GO:0003723|GO:0004826|GO:0000166|GO:0004826|GO:0005524|GO:0005737|GO:0006432	NA	NA
scaffold_1	2423659	2427402	Crypa1.fgenesh1_pg.C_scaffold_1000633	NA	NA	NA	NA
scaffold_1	2428474	2430065	fgenesh1_pg.1_#_641	Cdc37 C terminal domain, Cdc37 N terminal kinase binding, Cdc37 Hsp90 binding domain	GO:0019901	NA	NA
scaffold_1	2430535	2436750	estExt_Genewise1Plus.C_11537	Domain of unknown function (DUF3535), Helicase conserved C-terminal domain, SNF2 family N-terminal domain	GO:0005524	NA	NA
scaffold_1	2443884	2445209	estExt_fgenesh1_kg.C_10263	NA	NA	NA	NA
scaffold_1	2445981	2449333	estExt_fgenesh1_pm.C_10525	SAPK-interacting protein 1 (Sin1), Pleckstrin-homology, SAPK-interacting protein 1 (Sin1), middle CRIM domain	NA	NA	NA
scaffold_1	2449613	2450854	Crypa1.fgenesh1_pm.C_scaffold_1000445	Mitotic checkpoint regulator, MAD2B-interacting	NA	NA	NA
scaffold_1	2451768	2454053	fgenesh1_pg.1_#_647	NA	NA	NA	NA
scaffold_1	2456634	2465258	Crypa1.estExt_Genewise1Plus.C_11292	Ubiquitin carboxyl-terminal hydrolase, Domain of unknown function (DUF3517)	GO:0016579|GO:0036459|GO:0006511|GO:0036459	NA	NA
scaffold_1	2468171	2469008	Crypa1.e_gw1.1.3172.1	RNase P subunit Pop3	GO:0006364|GO:0008033	NA	NA
scaffold_1	2470038	2471330	Crypa1.fgenesh1_pg.C_scaffold_1000642	NA	NA	NA	NA
scaffold_1	2471978	2473069	fgenesh1_pg.1_#_651	Histidine biosynthesis protein	GO:0003824|GO:0000105|GO:0003949|GO:0000105	NA	NA
scaffold_1	2473529	2474723	e_gw1.1.1346.1	NA	NA	NA	NA
scaffold_1	2476132	2480720	Crypa1.estExt_Genewise1Plus.C_11299	STE like transcription factor, Zinc finger, C2H2 type, Zinc finger, C2H2 type	GO:0003700|GO:0005634|GO:0006355|GO:0003676	NA	NA
scaffold_1	2493372	2495567	estExt_Genewise1.C_11573	CBF/Mak21 family, Nucleolar complex-associated protein	NA	NA	NA
scaffold_1	2495955	2501448	fgenesh1_pg.1_#_655	BP28CT (NUC211) domain, U3 small nucleolar RNA-associated protein 10	NA	NA	NA
scaffold_1	2501603	2503403	Crypa1.estExt_fgenesh1_pg.C_10645	Phage lysozyme	GO:0003796|GO:0009253|GO:0016998	NA	NA
scaffold_1	2504145	2506270	fgenesh1_pg.1_#_657	Pyridine nucleotide-disulphide oxidoreductase	GO:0016491|GO:0055114	NA	NA
scaffold_1	2506410	2507061	estExt_fgenesh1_kg.C_10269	NA	NA	NA	NA
scaffold_1	2507125	2511708	e_gw1.1.1937.1	Cell division protein anillin, PH domain	NA	NA	NA
scaffold_1	2514248	2517648	Crypa1.fgenesh1_pg.C_scaffold_1000651	Cation transporter/ATPase, N-terminus, haloacid dehalogenase-like hydrolase, E1-E2 ATPase	GO:0000166|GO:0016021|GO:0008553|GO:0016021|GO:0120029	NA	NA
scaffold_1	2521667	2523836	estExt_Genewise1.C_11591	Helicase conserved C-terminal domain, DEAD/DEAH box helicase	GO:0003676|GO:0005524	NA	NA
scaffold_1	2525592	2526482	Crypa1.gw1.1.963.1	NA	GO:0006629|GO:0008081	NA	NA
scaffold_1	2526891	2527904	fgenesh1_pg.1_#_662	Glutathione S-transferase, C-terminal domain, Glutathione S-transferase, N-terminal domain	GO:0005515	NA	NA
scaffold_1	2529466	2530147	e_gw1.1.1723.1	NA	NA	NA	NA
scaffold_1	2530336	2530602	gw1.1.1835.1	NA	NA	NA	NA
scaffold_1	2532165	2533825	estExt_Genewise1.C_11606	Paf1	GO:0006368|GO:0016570|GO:0016593	NA	NA
scaffold_1	2534298	2535540	estExt_fgenesh1_kg.C_10273	Rer1 family	GO:0016021	NA	NA
scaffold_1	2536113	2537088	e_gw1.1.3079.1	Enoyl-CoA hydratase/isomerase	GO:0003824	NA	NA
scaffold_1	2538159	2540777	e_gw1.1.2156.1	NA	GO:0005515	NA	NA
scaffold_1	2542095	2544319	gw1.1.3593.1	tRNA pseudouridine synthase D (TruD)	GO:0001522|GO:0003723|GO:0009451|GO:0009982	NA	NA
scaffold_1	2545391	2548399	estExt_fgenesh1_kg.C_10274	Protein kinase domain	GO:0004672|GO:0005524|GO:0006468|GO:0005524|GO:0004672|GO:0006468	NA	NA
scaffold_1	2550216	2552019	estExt_Genewise1Plus.C_11613	DEAD/DEAH box helicase, Helicase conserved C-terminal domain	GO:0003676|GO:0005524	NA	NA
scaffold_1	2558043	2559886	fgenesh1_pg.1_#_671	NA	NA	NA	NA
scaffold_1	2561007	2561722	estExt_fgenesh1_kg.C_10276	NA	NA	NA	NA
scaffold_1	2561974	2562557	fgenesh1_kg.1_#_281_#_CEST_01_G_02	NA	NA	NA	NA
scaffold_1	2566415	2567175	estExt_fgenesh1_kg.C_10282	NA	NA	NA	NA
scaffold_1	2568026	2569099	fgenesh1_pm.1_#_556	RNase H	GO:0003676|GO:0004523|GO:0003676	NA	NA
scaffold_1	2569374	2571209	Crypa1.fgenesh1_pm.C_scaffold_1000469	Major Facilitator Superfamily	GO:0016021|GO:0055085	NA	NA
scaffold_1	2571308	2571470	Crypa1.fgenesh1_kg.C_scaffold_1000314	NA	NA	NA	NA
scaffold_1	2572384	2572863	gw1.1.4787.1	Ankyrin repeats (many copies), Ankyrin repeats (3 copies)	GO:0005515	NA	NA
scaffold_1	2573038	2573644	e_gw1.1.1728.1	Ankyrin repeats (3 copies), Ankyrin repeats (3 copies)	GO:0005515	NA	NA
scaffold_1	2575876	2576681	fgenesh1_pg.1_#_675	NA	NA	NA	NA
scaffold_1	2578075	2578788	gw1.1.1280.1	NA	GO:0007249	NA	NA
scaffold_1	2579502	2581429	Crypa1.estExt_Genewise1Plus.C_11349	Glycosyl transferase family 90	NA	NA	NA
scaffold_1	2582276	2583537	estExt_fgenesh1_kg.C_10285	Ribosomal protein S8	GO:0003735|GO:0005840|GO:0006412	NA	NA
scaffold_1	2583783	2584839	estExt_fgenesh1_kg.C_10289	Ribosomal protein L7Ae/L30e/S12e/Gadd45 family	GO:0003735|GO:0005622|GO:0005840|GO:0006412	NA	NA
scaffold_1	2584961	2585510	Crypa1.e_gw1.1.1550.1	PPIC-type PPIASE domain	GO:0003755	NA	NA
scaffold_1	2589100	2589894	estExt_fgenesh1_kg.C_10300	NA	NA	NA	NA
scaffold_1	2590965	2592332	Crypa1.estExt_fgenesh1_pg.C_10668	NA	NA	NA	NA
scaffold_1	2593228	2594690	e_gw1.1.4462.1	NA	NA	NA	NA
scaffold_1	2595759	2596690	e_gw1.1.3342.1	pinin/SDK/memA/ protein conserved region	NA	NA	NA
scaffold_1	2597834	2598552	estExt_fgenesh1_kg.C_10303	PHF5-like protein	NA	NA	NA
scaffold_1	2598679	2600164	Crypa1.fgenesh1_pm.C_scaffold_1000475	NA	NA	NA	NA
scaffold_1	2602362	2603676	Crypa1.e_gw1.1.1021.1	39S mitochondrial ribosomal protein L46	GO:0016787|GO:0003735	NA	NA
scaffold_1	2604850	2606923	e_gw1.1.3782.1	PHD-finger, Ring finger domain	NA	NA	NA
scaffold_1	2608752	2610015	estExt_fgenesh1_kg.C_10304	Ribosomal L37ae protein family	GO:0006412|GO:0003735|GO:0005622|GO:0005840|GO:0006412	NA	NA
scaffold_1	2610646	2612204	e_gw1.1.2672.1	Saccharopine dehydrogenase NADP binding domain	GO:0016491|GO:0055114	NA	NA
scaffold_1	2613804	2615430	e_gw1.1.2475.1	Uncharacterised ACR, YagE family COG1723	NA	NA	NA
scaffold_1	2616140	2617204	e_gw1.1.4518.1	NA	NA	NA	NA
scaffold_1	2617945	2619878	estExt_Genewise1Plus.C_11667	TCP-1/cpn60 chaperonin family	GO:0005524|GO:0005524|GO:0006457|GO:0051082	NA	NA
scaffold_1	2625914	2627304	fgenesh1_pg.1_#_692	NA	NA	NA	NA
scaffold_1	2629675	2633040	fgenesh1_pg.1_#_693	Pleckstrin homology domain, von Willebrand factor type A domain	NA	NA	NA
scaffold_1	2635603	2640667	Crypa1.estExt_Genewise1Plus.C_11386	Phospholipid-translocating P-type ATPase C-terminal, E1-E2 ATPase, Cation transport ATPase (P-type), haloacid dehalogenase-like hydrolase, Phospholipid-translocating ATPase N-terminal	GO:0000166|GO:0016021|GO:0000287|GO:0004012|GO:0005524|GO:0015914|GO:0016021	NA	NA
scaffold_1	2640963	2642285	fgenesh1_pm.1_#_573	NA	NA	NA	NA
scaffold_1	2646546	2647643	e_gw1.1.3132.1	NA	NA	NA	NA
scaffold_1	2655375	2656342	fgenesh1_pg.1_#_697	NA	NA	NA	NA
scaffold_1	2659360	2660538	estExt_Genewise1Plus.C_11678	Bucentaur or craniofacial development	NA	NA	NA
scaffold_1	2660619	2661850	estExt_fgenesh1_kg.C_10309	DSBA-like thioredoxin domain	GO:0015035	NA	NA
scaffold_1	2662234	2663596	Crypa1.fgenesh1_pm.C_scaffold_1000486	short chain dehydrogenase, short chain dehydrogenase	GO:0016491	NA	NA
scaffold_1	2664934	2666069	gw1.1.2765.1	Magnesium transporter NIPA	GO:0015095|GO:0015693|GO:0016021	NA	NA
scaffold_1	2669205	2669610	fgenesh1_kg.1_#_310_#_4217_0_CCBI582.g1_CCBH_CCBI_EXTA	NA	NA	NA	NA
scaffold_1	2669698	2671155	estExt_fgenesh1_kg.C_10311	short chain dehydrogenase	NA	NA	NA
scaffold_1	2673993	2676506	Crypa1.e_gw1.1.1929.1	Vps51/Vps67	GO:0006891|GO:0017119	NA	NA
scaffold_1	2676466	2677837	estExt_Genewise1Plus.C_11700	Enoyl-CoA hydratase/isomerase	GO:0003824	NA	NA
scaffold_1	2679680	2681217	fgenesh1_pg.1_#_706	Major Facilitator Superfamily	GO:0016021|GO:0055085	NA	NA
scaffold_1	2682347	2683671	Crypa1.fgenesh1_pm.C_scaffold_1000493	PQ loop repeat, PQ loop repeat	NA	NA	NA
scaffold_1	2685320	2686656	e_gw1.1.2696.1	NADH pyrophosphatase-like rudimentary NUDIX domain, NUDIX domain	GO:0016787	NA	NA
scaffold_1	2687946	2689019	estExt_fgenesh1_kg.C_10315	Ribosomal protein L1p/L10e family	GO:0003723|GO:0003735|GO:0006412|GO:0015934	NA	NA
scaffold_1	2690145	2691516	gw1.1.616.1	Beta-lactamase	NA	NA	NA
scaffold_1	2694886	2696053	gw1.1.2989.1	NA	NA	NA	NA
scaffold_1	2700456	2702059	gw1.1.4558.1	NA	NA	NA	NA
scaffold_1	2702829	2704456	estExt_fgenesh1_kg.C_10319	50S ribosome-binding GTPase	GO:0005525	NA	NA
scaffold_1	2705069	2705540	Crypa1.fgenesh1_kg.C_scaffold_1000349	NA	NA	NA	NA
scaffold_1	2705606	2706302	fgenesh1_kg.1_#_320_#_0_0_CCBI1204.b1_CCBH_CCBI_EXTA	NA	NA	NA	NA
scaffold_1	2707600	2709318	estExt_fgenesh1_kg.C_10321	Hsp70 protein	NA	NA	NA
scaffold_1	2709585	2710411	estExt_fgenesh1_kg.C_10323	NA	NA	NA	NA
scaffold_1	2711518	2712329	Crypa1.estExt_fgenesh1_kg.C_10353	NA	NA	NA	NA
scaffold_1	2712308	2713978	fgenesh1_pm.1_#_593	NA	GO:0003676	NA	NA
scaffold_1	2721212	2722462	fgenesh1_pm.1_#_594	NA	NA	NA	NA
scaffold_1	2726726	2728760	estExt_Genewise1.C_11745	NA	GO:0000981|GO:0005634|GO:0006355|GO:0008270	NA	NA
scaffold_1	2731964	2733844	fgenesh1_pg.1_#_719	NA	NA	NA	NA
scaffold_1	2736003	2737139	Crypa1.fgenesh1_pg.C_scaffold_1000708	NA	NA	NA	NA
scaffold_1	2737829	2739837	Crypa1.estExt_fgenesh1_pm.C_10499	Uncharacterised protein family, YAP/Alf4/glomulin	NA	NA	NA
scaffold_1	2741470	2742688	fgenesh1_pm.1_#_596	Isochorismatase family	GO:0003824	NA	NA
scaffold_1	2748366	2749527	fgenesh1_pg.1_#_722	NA	NA	NA	NA
scaffold_1	2751363	2755097	Crypa1.estExt_Genewise1Plus.C_11435	UDP-glucoronosyl and UDP-glucosyl transferase, Glycosyltransferase family 28 N-terminal domain	GO:0016758|GO:0005975|GO:0016758|GO:0030259	NA	NA
scaffold_1	2757112	2757939	fgenesh1_kg.1_#_326_#_208_0_CCBI1995.b1_CCBH_CCBI_EXTA	NA	NA	NA	NA
scaffold_1	2762776	2764015	estExt_fgenesh1_kg.C_10327	NA	NA	NA	NA
scaffold_1	2764408	2766770	e_gw1.1.2248.1	ABC-2 type transporter, ABC transporter	GO:0005524|GO:0016887|GO:0016020	NA	NA
scaffold_1	2769225	2771629	fgenesh1_pm.1_#_601	Fungal Zn(2)-Cys(6) binuclear cluster domain, Fungal specific transcription factor domain	GO:0000981|GO:0005634|GO:0006355|GO:0008270|GO:0003677|GO:0005634|GO:0006351|GO:0008270	NA	NA
scaffold_1	2780767	2781648	gw1.1.2804.1	C-5 cytosine-specific DNA methylase	GO:0008168	NA	NA
scaffold_1	2786258	2787978	estExt_fgenesh1_kg.C_10330	NADH ubiquinone oxidoreductase subunit NDUFA12	GO:0008137|GO:0009055|GO:0016020	NA	NA
scaffold_1	2788999	2789850	Crypa1.e_gw1.1.3250.1	Calponin homology (CH) domain	GO:0005515	NA	NA
scaffold_1	2792092	2794475	estExt_Genewise1.C_11769	Carboxylesterase family	NA	NA	NA
scaffold_1	2796459	2796862	gw1.1.3271.1	DDE superfamily endonuclease	GO:0003676	NA	NA
scaffold_1	2798860	2802310	Crypa1.estExt_Genewise1Plus.C_11455	NRDE-2, necessary for RNA interference	GO:0005515|GO:0006396	NA	NA
scaffold_1	2804129	2807492	estExt_Genewise1.C_11777	Voltage gated chloride channel	GO:0005247|GO:0006821|GO:0016020|GO:0055085	NA	NA
scaffold_1	2807568	2809598	e_gw1.1.436.1	FAD binding domain of DNA photolyase, DNA photolyase	NA	NA	NA
scaffold_1	2810450	2812508	Crypa1.fgenesh1_pm.C_scaffold_1000513	AMP-binding enzyme C-terminal domain, AMP-binding enzyme	GO:0003824	NA	NA
scaffold_1	2813628	2815297	Crypa1.e_gw1.1.3728.1	Glycosyl hydrolase family 1	GO:0004553|GO:0005975	NA	NA
scaffold_1	2818323	2819242	gw1.1.3179.1	NA	NA	NA	NA
scaffold_1	2819810	2820910	e_gw1.1.1222.1	Alcohol dehydrogenase GroES-like domain, Zinc-binding dehydrogenase	GO:0055114|GO:0016491	NA	NA
scaffold_1	2821890	2824855	gw1.1.192.1	Tetratricopeptide repeat, Tetratricopeptide repeat	GO:0005515|GO:0001004|GO:0006383	NA	NA
scaffold_1	2826014	2828456	estExt_fgenesh1_pm.C_10606	SAM domain (Sterile alpha motif)	GO:0005515|GO:0003729|GO:0043488	NA	NA
scaffold_1	2831783	2832526	fgenesh1_kg.1_#_334_#_CLS_107_contig_CL80Contig1	Ribosomal L29e protein family	GO:0003735|GO:0005622|GO:0005840|GO:0006412	NA	NA
scaffold_1	2833004	2834294	fgenesh1_pg.1_#_741	Mitochondrial carrier protein, Mitochondrial carrier protein, Mitochondrial carrier protein	GO:0022857|GO:0022857|GO:0055085	NA	NA
scaffold_1	2835796	2838668	e_gw1.1.204.1	Calpain family cysteine protease	GO:0004198|GO:0005622|GO:0006508	NA	NA
scaffold_1	2839782	2841547	estExt_fgenesh1_pm.C_10609	Zinc finger, C2H2 type	GO:0003676	NA	NA
scaffold_1	2853017	2854702	estExt_fgenesh1_kg.C_10335	NA	NA	NA	NA
scaffold_1	2855178	2856456	estExt_fgenesh1_pm.C_10611	Ras family	GO:0005525|GO:0003924|GO:0005525	NA	NA
scaffold_1	2861450	2862032	estExt_fgenesh1_kg.C_10337	NA	NA	NA	NA
scaffold_1	2862462	2864747	e_gw1.1.163.1	Fungal specific transcription factor domain, Fungal Zn(2)-Cys(6) binuclear cluster domain	GO:0000981|GO:0005634|GO:0006355|GO:0008270|GO:0003677|GO:0005634|GO:0006351|GO:0008270	NA	NA
scaffold_1	2881600	2882226	e_gw1.1.4845.1	Family of unknown function (DUF5321)	NA	NA	NA
scaffold_1	2882285	2883490	Crypa1.e_gw1.1.942.1	Sir2 family	GO:0070403	NA	NA
scaffold_1	2885338	2886639	fgenesh1_pm.1_#_624	Cation efflux family	GO:0006812|GO:0008324|GO:0016021|GO:0055085	NA	NA
scaffold_1	2887634	2889677	fgenesh1_pg.1_#_750	FGGY family of carbohydrate kinases, C-terminal domain, FGGY family of carbohydrate kinases, N-terminal domain	GO:0005975|GO:0016773	2889656	3.818e+01
scaffold_1	2890463	2892019	e_gw1.1.2711.1	alpha/beta hydrolase fold	GO:0016787	NA	NA
scaffold_1	2894803	2895565	estExt_fgenesh1_kg.C_10338	Histone-like transcription factor (CBF/NF-Y) and archaeal histone	GO:0046982	NA	NA
scaffold_1	2896678	2900705	Crypa1.estExt_Genewise1Plus.C_11511	Phosphatidylinositol 3- and 4-kinase, Yeast phosphatidylinositol-4-OH kinase Pik1	GO:0016301|GO:0016773|GO:0046854|GO:0048015	2897259	3.416e+01
scaffold_1	2901714	2902977	Crypa1.fgenesh1_pg.C_scaffold_1000744	NA	NA	NA	NA
scaffold_1	2903477	2906212	Crypa1.estExt_fgenesh1_pg.C_10740	NA	NA	NA	NA
scaffold_1	2907912	2910670	Crypa1.e_gw1.1.200.1	NA	GO:0000055|GO:0000056|GO:0006913|GO:0017056|GO:0005515	2910440	2.287e+01
scaffold_1	2911099	2911877	fgenesh1_pm.1_#_630	RNA recognition motif. (a.k.a. RRM, RBD, or RNP domain)	GO:0003676|GO:0000339|GO:0005846|GO:0045292	NA	NA
scaffold_1	2911971	2912319	fgenesh1_kg.1_#_339_#_CLS_3419_singleton_CP155-003D03	NA	NA	NA	NA
scaffold_1	2912479	2912883	fgenesh1_pg.1_#_758	Mitochondrial ribosomal protein L31	NA	NA	NA
scaffold_1	2913292	2913916	Crypa1.e_gw1.1.1533.1	Sedlin, N-terminal conserved region	GO:0005622|GO:0006888	NA	NA
scaffold_1	2914198	2915289	estExt_fgenesh1_kg.C_10342	Centromere kinetochore component CENP-T histone fold	GO:0046982|GO:0000786|GO:0003677|GO:0005634|GO:0000786|GO:0003677|GO:0005634|GO:0006334	NA	NA
scaffold_1	2916329	2919057	Crypa1.estExt_Genewise1Plus.C_11530	Poly(A) polymerase predicted RNA binding domain, Poly(A) polymerase central domain, Nucleotidyltransferase domain	GO:0003723|GO:0043631|GO:0004652|GO:0043631|GO:0004652|GO:0005634|GO:0043631|GO:0003723|GO:0016779|GO:0031123|GO:0016779	NA	NA
scaffold_1	2919620	2921890	e_gw1.1.3705.1	Septin	GO:0005525	2921196	2.186e+01
scaffold_1	2922929	2923719	fgenesh1_kg.1_#_346_#_641_2_CCBH_CCBI_EXTA	NA	NA	NA	NA
scaffold_1	2923812	2926280	gw1.1.3653.1	Fungal Zn(2)-Cys(6) binuclear cluster domain, Fungal specific transcription factor domain	GO:0000981|GO:0005634|GO:0006355|GO:0008270|GO:0003677|GO:0005634|GO:0006351|GO:0008270	NA	NA
scaffold_1	2926895	2929079	estExt_fgenesh1_kg.C_10347	FAD dependent oxidoreductase	GO:0016491|GO:0055114	NA	NA
scaffold_1	2936702	2937404	fgenesh1_kg.1_#_348_#_CEST_27_B_04	Homeobox KN domain	GO:0003677|GO:0003677|GO:0006355	NA	NA
scaffold_1	2939549	2940828	fgenesh1_pg.1_#_766	NA	NA	NA	NA
scaffold_1	2956928	2960127	fgenesh1_pm.1_#_638	Rhodanese-like domain	NA	NA	NA
scaffold_1	2962062	2964143	estExt_Genewise1.C_11873	PIG-X / PBN1	GO:0005789|GO:0006506	NA	NA
scaffold_1	2964358	2965857	estExt_Genewise1Plus.C_11861	Oxidoreductase NAD-binding domain, Oxidoreductase FAD-binding domain	GO:0016491|GO:0055114	NA	NA
scaffold_1	2966163	2966862	e_gw1.1.4709.1	Protein of unknown function (DUF3605)	NA	NA	NA
scaffold_1	2966948	2967656	estExt_Genewise1Plus.C_11867	Protein of unknown function (DUF788)	NA	NA	NA
scaffold_1	2968976	2971531	fgenesh1_pm.1_#_643	Tetratricopeptide repeat, Tetratricopeptide repeat, Anaphase-promoting complex, cyclosome, subunit 3, Tetratricopeptide repeat	GO:0005515	NA	NA
scaffold_1	2972207	2972956	fgenesh1_pg.1_#_772	AhpC/TSA antioxidant enzyme	NA	NA	NA
scaffold_1	2973561	2975296	Crypa1.e_gw1.1.687.1	Tubulin domain, Misato Segment II tubulin-like domain	NA	2973937	2.828e+01
scaffold_1	2977639	2980829	estExt_fgenesh1_pg.C_10763	FHA domain, Forkhead domain	GO:0003700|GO:0006355|GO:0043565|GO:0005515	NA	NA
scaffold_1	2981476	2985639	fgenesh1_pm.1_#_647	Tetratricopeptide repeat, Translation initiation factor eIF3 subunit 135, Mitochondrial function, CLU-N-term, Clustered mitochondria, Tetratricopeptide repeat, Tetratricopeptide repeat	GO:0005515|GO:0048312	NA	NA
scaffold_1	2987387	2989294	Crypa1.fgenesh1_pg.C_scaffold_1000764	NA	NA	NA	NA
scaffold_1	2994400	2997352	estExt_fgenesh1_pg.C_10766	Ferric reductase NAD binding domain, Ferric reductase like transmembrane component, FAD-binding domain	GO:0016491|GO:0055114	NA	NA
scaffold_1	3003187	3003885	Crypa1.estExt_fgenesh1_kg.C_10384	NA	NA	NA	NA
scaffold_1	3006669	3007432	estExt_Genewise1Plus.C_11890	NA	GO:0005515	NA	NA
scaffold_1	3007782	3010122	Crypa1.e_gw1.1.469.1	Cytochrome P450, Cytochrome P450, Cytochrome P450	GO:0005506|GO:0016705|GO:0020037|GO:0055114|GO:0016705|GO:0055114	NA	NA
scaffold_1	3011936	3012458	fgenesh1_pg.1_#_780	NA	NA	NA	NA
scaffold_1	3014048	3016111	fgenesh1_pm.1_#_652	CorA-like Mg2+ transporter protein	GO:0016020|GO:0030001|GO:0046873|GO:0055085	NA	NA
scaffold_1	3018179	3019409	e_gw1.1.1206.1	Predicted membrane protein (DUF2306)	NA	NA	NA
scaffold_1	3020407	3021407	Crypa1.fgenesh1_pg.C_scaffold_1000772	NA	NA	NA	NA
scaffold_1	3025804	3027714	fgenesh1_pg.1_#_785	Cytochrome P450	GO:0005506|GO:0016705|GO:0020037|GO:0055114|GO:0016705|GO:0055114	NA	NA
scaffold_1	3029427	3030304	fgenesh1_pm.1_#_655	NA	NA	NA	NA
scaffold_1	3030577	3032605	estExt_fgenesh1_kg.C_10355	Ribosomal protein L30p/L7e, Ribosomal L30 N-terminal domain	NA	NA	NA
scaffold_1	3032827	3034081	estExt_fgenesh1_kg.C_10358	Ribosomal protein S11	GO:0003735|GO:0005840|GO:0006412	NA	NA
scaffold_1	3034284	3037871	fgenesh1_pm.1_#_658	Helicase conserved C-terminal domain, SNF2 family N-terminal domain	GO:0005524	NA	NA
scaffold_1	3039065	3040954	fgenesh1_pm.1_#_659	Prephenate dehydrogenase	GO:0055114|GO:0004665|GO:0006571|GO:0008977|GO:0055114	NA	NA
scaffold_1	3041396	3042818	estExt_Genewise1Plus.C_11920	Regulator of chromosome condensation (RCC1) repeat, Regulator of chromosome condensation (RCC1) repeat, Regulator of chromosome condensation (RCC1) repeat	NA	NA	NA
scaffold_1	3042916	3044609	e_gw1.1.4175.1	Rad9	GO:0000077|GO:0006281|GO:0030896|GO:0000077|GO:0030896	NA	NA
scaffold_1	3045453	3047097	gw1.1.2569.1	NA	NA	NA	NA
scaffold_1	3047750	3048262	fgenesh1_pg.1_#_794	NA	NA	NA	NA
scaffold_1	3049470	3051459	estExt_Genewise1Plus.C_11928	Alkaline phosphatase	GO:0003824|GO:0016791	NA	NA
scaffold_1	3051974	3052970	e_gw1.1.2997.1	short chain dehydrogenase	NA	NA	NA
scaffold_1	3055922	3058360	estExt_fgenesh1_pg.C_10785	PLD-like domain, PLD-like domain	GO:0003824	NA	NA
scaffold_1	3060946	3061853	estExt_fgenesh1_kg.C_10362	Anp1	NA	NA	NA
scaffold_1	3062070	3063533	Crypa1.fgenesh1_pg.C_scaffold_1000788	NA	NA	NA	NA
scaffold_1	3065784	3067166	estExt_fgenesh1_kg.C_10363	Mpv17 / PMP22 family	GO:0016021	NA	NA
scaffold_1	3067671	3070777	estExt_Genewise1.C_11953	DEAD/DEAH box helicase, Helicase conserved C-terminal domain	GO:0003676|GO:0005524	NA	NA
scaffold_1	3071701	3074162	Crypa1.estExt_fgenesh1_pm.C_10558	Domain of unknown function (DUF1939), Alpha amylase, catalytic domain	GO:0003824|GO:0005975|GO:0004553|GO:0005509|GO:0005975|GO:0004553	NA	NA
scaffold_1	3074901	3075740	gw1.1.3105.1	EAP30/Vps36 family	GO:0000814|GO:0071985	NA	NA
scaffold_1	3076304	3077685	estExt_fgenesh1_kg.C_10368	Ribosomal protein S9/S16	GO:0003735|GO:0005840|GO:0006412	NA	NA
scaffold_1	3077976	3079986	Crypa1.estExt_Genewise1Plus.C_11624	AAR2 protein, AAR2 protein	NA	NA	NA
scaffold_1	3085961	3088222	estExt_Genewise1.C_11967	NA	GO:0003676|GO:0006355	NA	NA
scaffold_1	3091203	3092444	fgenesh1_pg.1_#_806	NA	NA	NA	NA
scaffold_1	3109134	3111429	Crypa1.e_gw1.1.577.1	Phosphomethylpyrimidine kinase, TENA/THI-4/PQQC family	GO:0006772|GO:0050334|GO:0008972|GO:0009228	NA	NA
scaffold_1	3112420	3116757	Crypa1.e_gw1.1.59.1	Rapamycin-insensitive companion of mTOR, domain 5, Rapamycin-insensitive companion of mTOR, middle domain, Rapamycin-insensitive companion of mTOR, N-term, Rapamycin-insensitive companion of mTOR RasGEF_N domain, Hr1 repeat	GO:0007165|GO:0031929|GO:0031932	NA	NA
scaffold_1	3118716	3120261	estExt_Genewise1.C_11974	Uricase, Uricase	GO:0004846|GO:0006144|GO:0055114	NA	NA
scaffold_1	3120742	3121410	Crypa1.fgenesh1_pg.C_scaffold_1000799	Ribosomal protein L13	GO:0003735|GO:0005840|GO:0006412	NA	NA
scaffold_1	3122002	3123385	Crypa1.fgenesh1_pm.C_scaffold_1000569	Copper/zinc superoxide dismutase (SODC), Heavy-metal-associated domain	GO:0006801|GO:0046872|GO:0030001|GO:0046872	NA	NA
scaffold_1	3130128	3132078	estExt_fgenesh1_pg.C_10800	Tetratricopeptide repeat, PB1 domain	GO:0005515	NA	NA
scaffold_1	3133504	3135726	estExt_Genewise1Plus.C_11972	Alpha/beta hydrolase family, Dual specificity phosphatase, catalytic domain	GO:0004725|GO:0016311|GO:0008138|GO:0016311|GO:0016311|GO:0016791	NA	NA
scaffold_1	3137219	3138121	estExt_fgenesh1_kg.C_10378	Protein of unknown function (DUF498/DUF598)	NA	NA	NA
scaffold_1	3138606	3139723	fgenesh1_kg.1_#_380_#_CEST_32_A_05	Ribosomal protein L34e	GO:0003735|GO:0005622|GO:0005840|GO:0006412	NA	NA
scaffold_1	3143289	3144070	Crypa1.estExt_fgenesh1_kg.C_10421	NA	NA	NA	NA
scaffold_1	3145100	3146292	fgenesh1_kg.1_#_389_#_3098_1_CCBH_CCBI_EXTA	Hemerythrin HHE cation binding domain	NA	NA	NA
scaffold_1	3146922	3147950	e_gw1.1.2871.1	JAB1/Mov34/MPN/PAD-1 ubiquitin protease	GO:0004222|GO:0008180|GO:0005515	NA	NA
scaffold_1	3149211	3151355	e_gw1.1.694.1	tRNA synthetases class I (E and Q), catalytic domain	GO:0006424|GO:0008270|GO:0004812|GO:0005524|GO:0043039|GO:0000049|GO:0000166|GO:0004818|GO:0005524|GO:0005737|GO:0006424|GO:0000166|GO:0004812|GO:0005524|GO:0005737|GO:0043039	NA	NA
scaffold_1	3153078	3154989	estExt_fgenesh1_kg.C_10389	DnaJ central domain, DnaJ C terminal domain, DnaJ domain	GO:0006457|GO:0051082|GO:0031072|GO:0051082|GO:0005524|GO:0006457|GO:0009408|GO:0051082	NA	NA
scaffold_1	3155496	3156749	estExt_fgenesh1_kg.C_10393	Ribosomal protein L32	GO:0003735|GO:0005622|GO:0005840|GO:0006412	NA	NA
scaffold_1	3157667	3159879	estExt_Genewise1Plus.C_11999	Pyridoxal-phosphate dependent enzyme, CBS domain	GO:0004122|GO:0005737|GO:0019343|GO:0006535	NA	NA
scaffold_1	3159996	3160841	Crypa1.e_gw1.1.2998.1	Signal recognition particle receptor beta subunit	NA	NA	NA
scaffold_1	3163282	3164457	fgenesh1_kg.1_#_397_#_3035_1_CCBH_CCBI_EXTA	DHHC palmitoyltransferase	NA	NA	NA
scaffold_1	3165269	3166470	e_gw1.1.4416.1	CAAX protease self-immunity	GO:0016020|GO:0004222|GO:0030176|GO:0071586	NA	NA
scaffold_1	3167520	3168941	e_gw1.1.4184.1	Maintenance of mitochondrial morphology protein 1	GO:0007005|GO:0032865|GO:0008289	NA	NA
scaffold_1	3169607	3172308	estExt_Genewise1Plus.C_12016	Sec1 family	GO:0006904|GO:0016192	NA	NA
scaffold_1	3172662	3175716	fgenesh1_pm.1_#_693	Glucose inhibited division protein A, GidA associated domain	GO:0008033|GO:0050660|GO:0002098	NA	NA
scaffold_1	3176047	3177203	e_gw1.1.2894.1	CDP-alcohol phosphatidyltransferase	GO:0008444|GO:0008654|GO:0016021|GO:0008654|GO:0016020|GO:0016780	NA	NA
scaffold_1	3184750	3185400	e_gw1.1.1660.1	Gti1/Pac2 family	NA	NA	NA
scaffold_1	3195445	3197559	Crypa1.e_gw1.1.367.1	Tyrosyl-DNA phosphodiesterase	GO:0005634|GO:0006281|GO:0008081	NA	NA
scaffold_1	3198961	3200957	e_gw1.1.3958.1	NAD(P)-binding Rossmann-like domain	NA	NA	NA
scaffold_1	3201239	3203731	Crypa1.estExt_fgenesh1_pg.C_10814	NA	NA	NA	NA
scaffold_1	3204701	3205249	fgenesh1_kg.1_#_400_#_CEST_05_B_12	RING-H2 zinc finger domain	GO:0008270	NA	NA
scaffold_1	3205542	3205996	e_gw1.1.4856.1	Microsomal signal peptidase 12 kDa subunit (SPC12)	GO:0005787|GO:0006465|GO:0008233|GO:0016021	NA	NA
scaffold_1	3206711	3209809	estExt_Genewise1.C_12055	CorA-like Mg2+ transporter protein	GO:0016020|GO:0030001|GO:0046873|GO:0055085	NA	NA
scaffold_1	3223350	3226154	fgenesh1_pg.1_#_836	NA	NA	NA	NA
scaffold_1	3229110	3229649	e_gw1.1.1731.1	Core histone H2A/H2B/H3/H4	GO:0046982|GO:0000786|GO:0003677	NA	NA
scaffold_1	3230903	3231754	e_gw1.1.4611.1	Der1-like family	NA	NA	NA
scaffold_1	3232128	3233153	estExt_fgenesh1_kg.C_10401	ARD/ARD' family	GO:0010309|GO:0055114|GO:0016491|GO:0019509	NA	NA
scaffold_1	3233651	3235888	estExt_Genewise1.C_12066	short chain dehydrogenase	NA	NA	NA
scaffold_1	3236479	3238815	estExt_Genewise1Plus.C_12052	NA	NA	NA	NA
scaffold_1	3239426	3241678	estExt_fgenesh1_pg.C_10830	MBOAT, membrane-bound O-acyltransferase family	NA	NA	NA
scaffold_1	3242569	3243584	fgenesh1_pm.1_#_705	Uracil phosphoribosyltransferase	GO:0009116	NA	NA
scaffold_1	3243956	3246904	Crypa1.e_gw1.1.137.1	ATP dependent DNA ligase C terminal region, BRCT domain, a BRCA1 C-terminus domain, ATP dependent DNA ligase domain, DNA ligase N terminus, DNA ligase IV	GO:0003910|GO:0006281|GO:0006310|GO:0003677|GO:0003910|GO:0005524|GO:0006281|GO:0051103|GO:0003677|GO:0003910|GO:0006281|GO:0006310|GO:0003910|GO:0005524|GO:0006281|GO:0006310|GO:0003909|GO:0051103|GO:0003910|GO:0005524|GO:0006281|GO:0006310|GO:0071897|GO:0003910	NA	NA
scaffold_1	3248754	3249015	fgenesh1_kg.1_#_405_#_CLS_5433_singleton_cp155-065D08	NA	NA	NA	NA
scaffold_1	3249560	3252969	estExt_Genewise1Plus.C_12067	Protein of unknown function (DUF4449)	NA	NA	NA
scaffold_1	3253878	3255544	fgenesh1_pm.1_#_709	Cytochrome P450, Cytochrome P450	GO:0005506|GO:0016705|GO:0020037|GO:0055114|GO:0016705|GO:0055114	NA	NA
scaffold_1	3258822	3260543	gw1.1.2431.1	CrcB-like protein, Camphor Resistance (CrcB), CrcB-like protein, Camphor Resistance (CrcB)	GO:0016021	NA	NA
scaffold_1	3261186	3261584	Crypa1.gw1.1.3267.1	NA	NA	NA	NA
scaffold_1	3266311	3266523	gw1.1.3362.1	hAT family C-terminal dimerisation region	GO:0046983	NA	NA
scaffold_1	3273036	3275451	estExt_fgenesh1_pg.C_10837	F-box domain	GO:0005515	NA	NA
scaffold_1	3276133	3277458	Crypa1.fgenesh1_pg.C_scaffold_1000838	NA	NA	NA	NA
scaffold_1	3279946	3282464	estExt_Genewise1Plus.C_12079	NA	NA	NA	NA
scaffold_1	3284945	3285634	fgenesh1_pm.1_#_711	Glutathione-dependent formaldehyde-activating enzyme	GO:0016846	NA	NA
scaffold_1	3292837	3293393	Crypa1.estExt_fgenesh1_kg.C_10442	NA	NA	NA	NA
scaffold_1	3293934	3294614	fgenesh1_pg.1_#_854	NA	NA	NA	NA
scaffold_1	3295156	3296391	Crypa1.estExt_Genewise1.C_11744	Triosephosphate isomerase	GO:0004807|GO:0003824|GO:0004807|GO:0006096	NA	NA
scaffold_1	3296634	3297174	Crypa1.fgenesh1_pg.C_scaffold_1000844	Mitochondrial ribosomal protein L51 / S25 / CI-B8 domain	GO:0003735|GO:0032543	NA	NA
scaffold_1	3297546	3298343	e_gw1.1.4693.1	U1 small nuclear ribonucleoprotein of 70kDa MW N terminal, RNA recognition motif. (a.k.a. RRM, RBD, or RNP domain)	GO:0003676	NA	NA
scaffold_1	3300016	3301014	e_gw1.1.1510.1	Ribosomal protein L10	GO:0000027|GO:0005622|GO:0042254	NA	NA
scaffold_1	3301703	3304122	fgenesh1_pm.1_#_716	Cullin protein neddylation domain, Cullin family	GO:0006511|GO:0031625	NA	NA
scaffold_1	3304808	3314457	Crypa1.estExt_fgenesh1_pm.C_10603	FATC domain, Telomere-length maintenance and DNA damage repair, Phosphatidylinositol 3- and 4-kinase	GO:0005515|GO:0004674|GO:0016301	3309314	2.282e+01
scaffold_2	1155014	1155746	Crypa1.fgenesh1_pg.C_scaffold_5000021	NA	NA	NA	NA
scaffold_2	1156610	1157060	Crypa1.fgenesh1_kg.C_scaffold_5000009	NA	NA	NA	NA
scaffold_2	1159148	1162168	Crypa1.fgenesh1_pg.C_scaffold_5000022	NA	NA	NA	NA
scaffold_2	1165565	1165798	Crypa1.e_gw1.5.1408.1	HD domain	GO:0002953	NA	NA
scaffold_2	1166716	1167654	Crypa1.fgenesh1_pg.C_scaffold_5000024	NA	NA	1167017	4.287e+01
scaffold_2	1168938	1169486	e_gw1.2.3267.1	NA	NA	NA	NA
scaffold_2	1171176	1171743	Crypa1.estExt_fgenesh1_kg.C_50011	NA	NA	NA	NA
scaffold_2	1173973	1175227	estExt_fgenesh1_kg.C_20037	NA	NA	1175042	4.512e+01
scaffold_2	1178496	1178645	e_gw1.2.902.1	NA	NA	NA	NA
scaffold_2	1186257	1186883	e_gw1.2.743.1	NA	NA	NA	NA
scaffold_2	1198758	1199272	gw1.2.821.1	NA	NA	NA	NA
scaffold_2	1203765	1203998	e_gw1.2.3036.1	Retrotransposon gag protein	NA	NA	NA
scaffold_2	1212824	1213024	e_gw1.2.990.1	NA	NA	NA	NA
scaffold_2	1218277	1218879	Crypa1.fgenesh1_pm.C_scaffold_5000008	NA	NA	NA	NA
scaffold_2	1219751	1221143	fgenesh1_pg.2_#_74	NA	NA	NA	NA
scaffold_2	1221667	1223434	estExt_fgenesh1_pg.C_20075	Protein kinase domain	GO:0004672|GO:0005524|GO:0006468|GO:0004672|GO:0006468	NA	NA
scaffold_2	1247748	1248005	e_gw1.2.2943.1	NA	NA	NA	NA
