# Supplementary material for: Emergence and diversification of a highly invasive chestnut pathogen lineage across southeastern Europe
Source: eLife. 2021 Mar 5;10:e56279. doi: 10.7554/eLife.56279 (PMC7935491; doi:10.7554/eLife.56279)
Supplement: Supplementary file 4. — *Isolates from the S12 MAT-1 lineage. [file elife-56279-supp4.xlsx]

## Sheet: Tabelle1
Supplementary Table 3: Summary of MAT-1 and MAT-2 isolate pairings used for testing sexual recombination in S12 populations. *) Isolates from the S12 MAT-1 lineage.
	MAT-1		MAT-2
Italy
Nebrodi	NE202*	X	NE164
Kosovo
Molliq	Mul63B*	X	Mul59
Bosnia
Konic	M1741*	X	M1779
Vrnograč	M1808	X	M1827
Projsa	M1427*	X	M1430
